# Supplementary material for: Synthesis of novel phthalazine-based derivatives with potent cytotoxicity against HCT-116 cells through apoptosis and VEGFR2 inhibition
Source: PubMed Central journal article supplement — RSC Adv. 2024 Apr 24;14(19):13027–43. doi: 10.1039/d4ra02103g (PMC11040327; doi:10.1039/d4ra02103g), 2024-04-24
Supplement: RA-014-D4RA02103G-s001.pdf [file RA-014-D4RA02103G-s001.pdf]

**Synthesis of novel Phthalazine-based derivatives with potent cytotoxicity against HCT-116 cells through apoptosis and VEGFR2 inhibition.**

**Table of contents**

|                                                                        |    |
|------------------------------------------------------------------------|----|
| <b>Figure S1</b> The <sup>1</sup> H-NMR spectrum of compound 3.....    | 4  |
| <b>Figure S2</b> The <sup>13</sup> C-NMR spectrum of compound 3.....   | 4  |
| <b>Figure S3</b> The IR spectrum of compound 3.....                    | 5  |
| <b>Figure S4</b> The <sup>1</sup> H-NMR spectrum of compound 4.....    | 5  |
| <b>Figure S5</b> The <sup>1</sup> H-NMR spectrum of compound 5.....    | 6  |
| <b>Figure S6</b> The <sup>13</sup> C-NMR spectrum of compound 5.....   | 6  |
| <b>Figure S7</b> The D2O spectrum of compound 5.....                   | 7  |
| <b>Figure S8</b> The IR spectrum of compound 5.....                    | 7  |
| <b>Figure S9</b> The <sup>1</sup> H-NMR spectrum of compound 7a.....   | 8  |
| <b>Figure S10</b> The <sup>13</sup> C-NMR spectrum of compound 7a..... | 8  |
| <b>Figure S11</b> The D2O spectrum of compound 7a.....                 | 9  |
| <b>Figure S12</b> The IR spectrum of compound 7a.....                  | 9  |
| <b>Figure S13</b> The <sup>1</sup> H-NMR spectrum of compound 7b.....  | 10 |
| <b>Figure S14</b> The <sup>13</sup> C-NMR spectrum of compound 7b..... | 10 |
| <b>Figure S15</b> The IR spectrum of compound 7b.....                  | 11 |
| <b>Figure S16</b> The <sup>1</sup> H-NMR spectrum of compound 7c.....  | 11 |
| <b>Figure S17</b> The <sup>13</sup> C-NMR spectrum of compound 7c..... | 12 |
| <b>Figure S18</b> The D2O spectrum of compound 7c.....                 | 12 |
| <b>Figure S19</b> The IR spectrum of compound 7c.....                  | 13 |
| <b>Figure S20</b> The <sup>1</sup> H-NMR spectrum of compound 7d.....  | 13 |
| <b>Figure S21</b> The <sup>13</sup> C-NMR spectrum of compound 7d..... | 14 |
| <b>Figure S22</b> The IR spectrum of compound 7d.....                  | 14 |
| <b>Figure S23</b> The <sup>1</sup> H-NMR spectrum of compound 7e.....  | 15 |
| <b>Figure S24</b> The <sup>13</sup> C-NMR spectrum of compound 7e..... | 15 |
| <b>Figure S25</b> The D2O spectrum of compound 7e.....                 | 16 |
| <b>Figure S26</b> The IR spectrum of compound 7e.....                  | 16 |
| <b>Figure S27</b> The <sup>1</sup> H-NMR spectrum of compound 7f.....  | 17 |
| <b>Figure S28</b> The <sup>13</sup> C-NMR spectrum of compound 7f..... | 17 |
| <b>Figure S29</b> The D2O spectrum of compound 7f.....                 | 18 |
| <b>Figure S30</b> The IR spectrum of compound 7f.....                  | 18 |
| <b>Figure S31</b> The <sup>1</sup> H-NMR spectrum of compound 7g.....  | 19 |
| <b>Figure S32</b> The <sup>13</sup> C-NMR spectrum of compound 7g..... | 19 |
| <b>Figure S33</b> The IR spectrum of compound 7g.....                  | 20 |
| <b>Figure S34</b> The <sup>1</sup> H-NMR spectrum of compound 8a.....  | 20 |
| <b>Figure S35</b> The <sup>13</sup> C-NMR spectrum of compound 8a..... | 21 |
| <b>Figure S36</b> The D2O spectrum of compound 8a.....                 | 21 |
| <b>Figure S37</b> The IR spectrum of compound 8a.....                  | 22 |

|                                                                                  |    |
|----------------------------------------------------------------------------------|----|
| <b>Figure S38</b> The <sup>1</sup> H-NMR spectrum of compound <b>8b</b> .....    | 22 |
| <b>Figure S39</b> The <sup>13</sup> C-NMR spectrum of compound <b>8b</b> .....   | 23 |
| <b>Figure S40</b> The D2O spectrum of compound <b>8b</b> .....                   | 23 |
| <b>Figure S41</b> The IR spectrum of compound <b>8b</b> .....                    | 24 |
| <b>Figure S42</b> The <sup>1</sup> H-NMR spectrum of compound <b>8c</b> .....    | 24 |
| <b>Figure S43</b> The <sup>13</sup> C-NMR spectrum of compound <b>8c</b> .....   | 25 |
| <b>Figure S44</b> The D2O spectrum of compound <b>8c</b> .....                   | 25 |
| <b>Figure S45</b> The IR spectrum of compound <b>8c</b> .....                    | 26 |
| <b>Figure S46</b> The <sup>1</sup> H-NMR spectrum of compound <b>9a</b> .....    | 26 |
| <b>Figure S47</b> The <sup>13</sup> C-NMR spectrum of compound <b>9a</b> .....   | 27 |
| <b>Figure S48</b> The D2O spectrum of compound <b>9a</b> .....                   | 27 |
| <b>Figure S49</b> The IR spectrum of compound <b>9a</b> .....                    | 28 |
| <b>Figure S50</b> The <sup>1</sup> H-NMR spectrum of compound <b>9b</b> .....    | 28 |
| <b>Figure S51</b> The <sup>13</sup> C-NMR spectrum of compound <b>9b</b> .....   | 29 |
| <b>Figure S52</b> The D2O spectrum of compound <b>9b</b> .....                   | 29 |
| <b>Figure S53</b> The IR spectrum of compound <b>9b</b> .....                    | 30 |
| <b>Figure S54</b> The <sup>1</sup> H-NMR spectrum of compound <b>9c</b> .....    | 30 |
| <b>Figure S55</b> The <sup>13</sup> C-NMR spectrum of compound <b>9c</b> .....   | 31 |
| <b>Figure S56</b> The D2O spectrum of compound <b>9c</b> .....                   | 31 |
| <b>Figure S57:</b> The IR spectrum of compound <b>9c</b> .....                   | 32 |
| <b>Figure S58:</b> The <sup>1</sup> H-NMR spectrum of compound <b>11a</b> .....  | 32 |
| <b>Figure S59:</b> The <sup>13</sup> C-NMR spectrum of compound <b>11a</b> ..... | 33 |
| <b>Figure S60:</b> The D2O spectrum of compound <b>11a</b> .....                 | 33 |
| <b>Figure S61:</b> The IR spectrum of compound <b>11a</b> .....                  | 34 |
| <b>Figure 62:</b> The <sup>1</sup> H-NMR spectrum of compound <b>11b</b> .....   | 34 |
| <b>Figure 63:</b> The <sup>13</sup> C-NMR spectrum of compound <b>11b</b> .....  | 35 |
| <b>Figure S64:</b> The D2O spectrum of compound <b>11b</b> .....                 | 35 |
| <b>Figure S65:</b> The IR spectrum of compound <b>11b</b> .....                  | 36 |
| <b>Figure S66:</b> The <sup>1</sup> H-NMR spectrum of compound <b>11c</b> .....  | 37 |
| <b>Figure S67:</b> The <sup>13</sup> C-NMR spectrum of compound <b>11c</b> ..... | 37 |
| <b>Figure S68:</b> The D2O spectrum of compound <b>11c</b> .....                 | 38 |
| <b>Figure S69:</b> The IR spectrum of compound <b>11c</b> .....                  | 38 |
| <b>Figure S70 :</b> The <sup>1</sup> H-NMR spectrum of compound <b>11d</b> ..... | 39 |
| <b>Figure S71:</b> The <sup>13</sup> C-NMR spectrum of compound <b>11d</b> ..... | 39 |
| <b>Figure S72:</b> The D2O spectrum of compound <b>11d</b> .....                 | 40 |
| <b>Figure S73:</b> The IR spectrum of compound <b>11d</b> .....                  | 40 |
| <b>Figure S74:</b> The <sup>1</sup> H-NMR spectrum of compound <b>12a</b> .....  | 41 |
| <b>Figure S75:</b> The <sup>13</sup> C-NMR spectrum of compound <b>12a</b> ..... | 41 |
| <b>Figure S76:</b> The D2O spectrum of compound <b>12a</b> .....                 | 42 |
| <b>Figure S77:</b> The IR spectrum of compound <b>12a</b> .....                  | 42 |
| <b>Figure S78:</b> The <sup>1</sup> H-NMR spectrum of compound <b>12b</b> .....  | 43 |
| <b>Figure S79:</b> The <sup>13</sup> C-NMR spectrum of compound <b>12b</b> ..... | 43 |
| <b>Figure S80:</b> The D2O spectrum of compound <b>12b</b> .....                 | 44 |
| <b>Figure S81:</b> The IR spectrum of compound <b>12b</b> .....                  | 44 |

|                                                                                  |    |
|----------------------------------------------------------------------------------|----|
| <b>Figure S82:</b> The dept135 spectrum of compound <b>12b</b> .....             | 45 |
| <b>Figure S83:</b> The <sup>1</sup> H-NMR spectrum of compound <b>12c</b> .....  | 45 |
| <b>Figure S84:</b> The <sup>13</sup> C-NMR spectrum of compound <b>12c</b> ..... | 46 |
| <b>Figure S85:</b> The D2O spectrum of compound <b>12c</b> .....                 | 46 |
| <b>Figure S86:</b> The IR spectrum of compound <b>12c</b> .....                  | 47 |
| <b>Figure S87:</b> The <sup>1</sup> H-NMR spectrum of compound <b>13a</b> .....  | 47 |
| <b>Figure S88:</b> The D2O spectrum of compound <b>13a</b> .....                 | 48 |
| <b>Figure S89:</b> The IR spectrum of compound <b>13a</b> .....                  | 48 |
| <b>Figure S90:</b> The <sup>1</sup> H-NMR spectrum of compound <b>13b</b> .....  | 49 |
| <b>Figure S91:</b> The D2O spectrum of compound <b>13b</b> .....                 | 49 |
| <b>Figure S92:</b> The IR spectrum of compound <b>13b</b> .....                  | 50 |
| <b>Figure S93:</b> The <sup>1</sup> H-NMR spectrum of compound <b>13c</b> .....  | 50 |
| <b>Figure S94:</b> The D2O spectrum of compound <b>13c</b> .....                 | 51 |
| <b>Figure S95:</b> The <sup>1</sup> H-NMR spectrum of compound <b>13d</b> .....  | 51 |
| <b>Figure S96:</b> The D2O spectrum of compound <b>13d</b> .....                 | 52 |
| <b>Figure S97:</b> The IR spectrum of compound <b>13d</b> .....                  | 52 |

## Electronic supporting information (ESI)

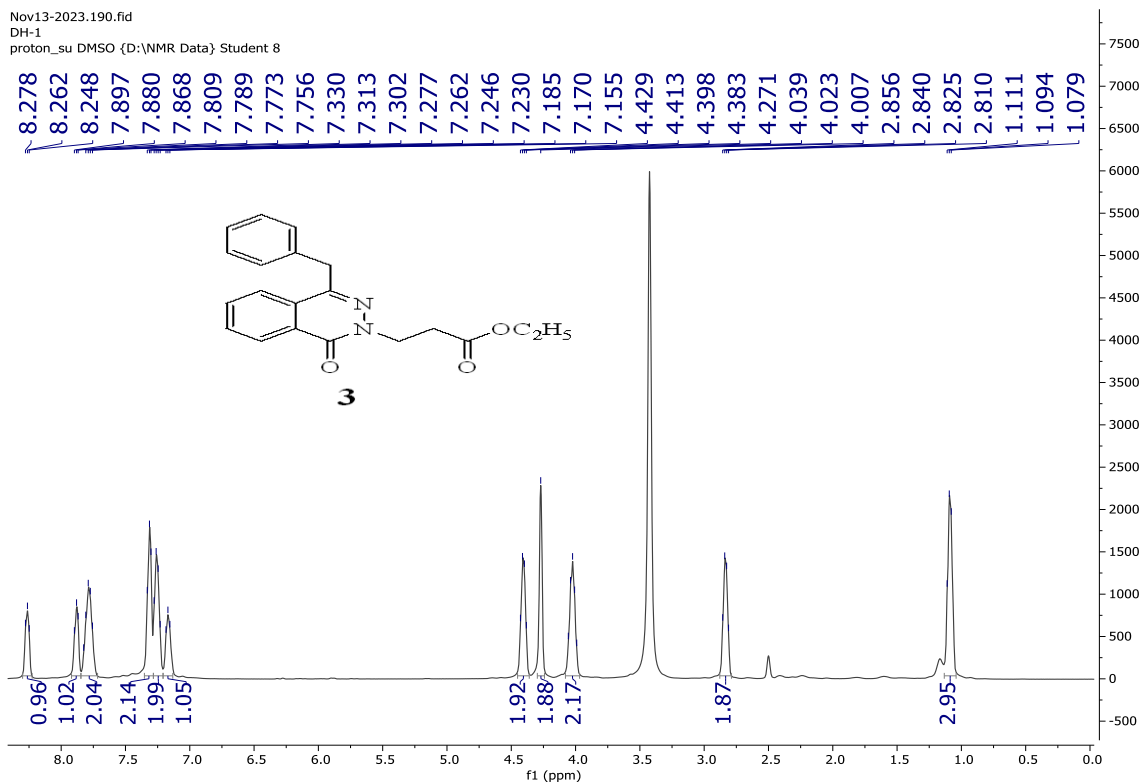

Figure S1 The  $^1\text{H}$ -NMR spectrum of compound **3**.

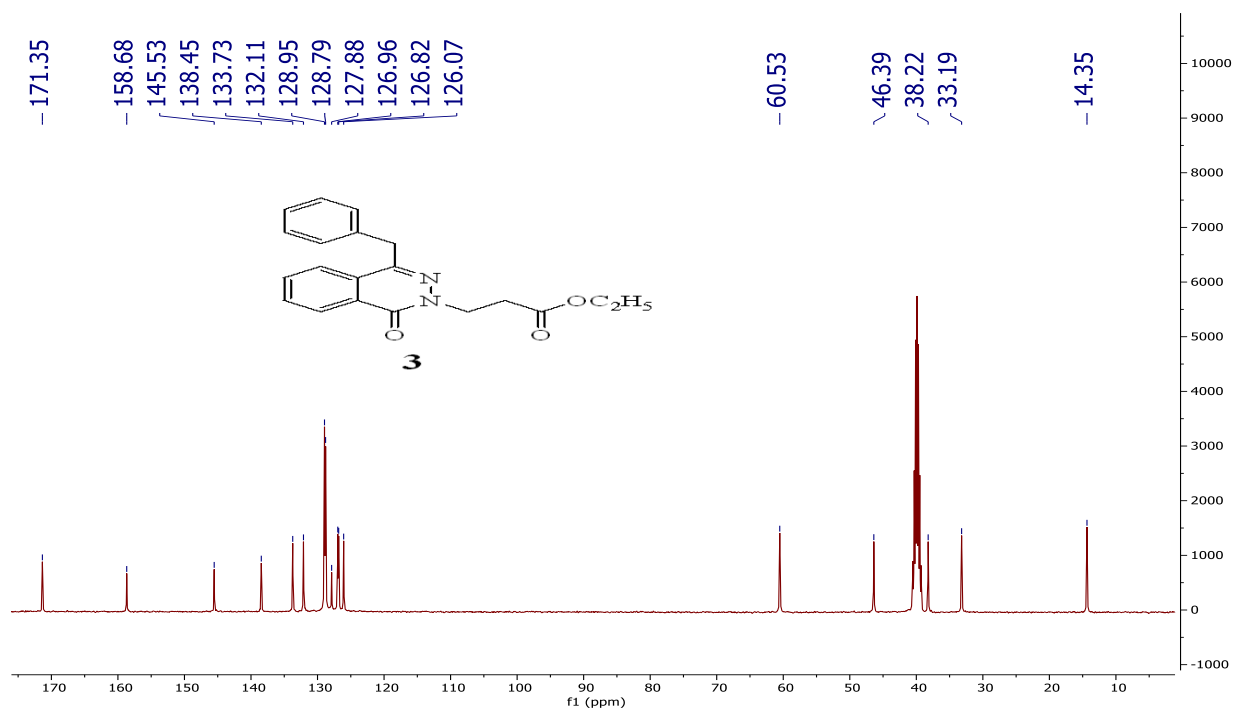

Figure S2 The  $^{13}\text{C}$ -NMR spectrum of compound **3**.

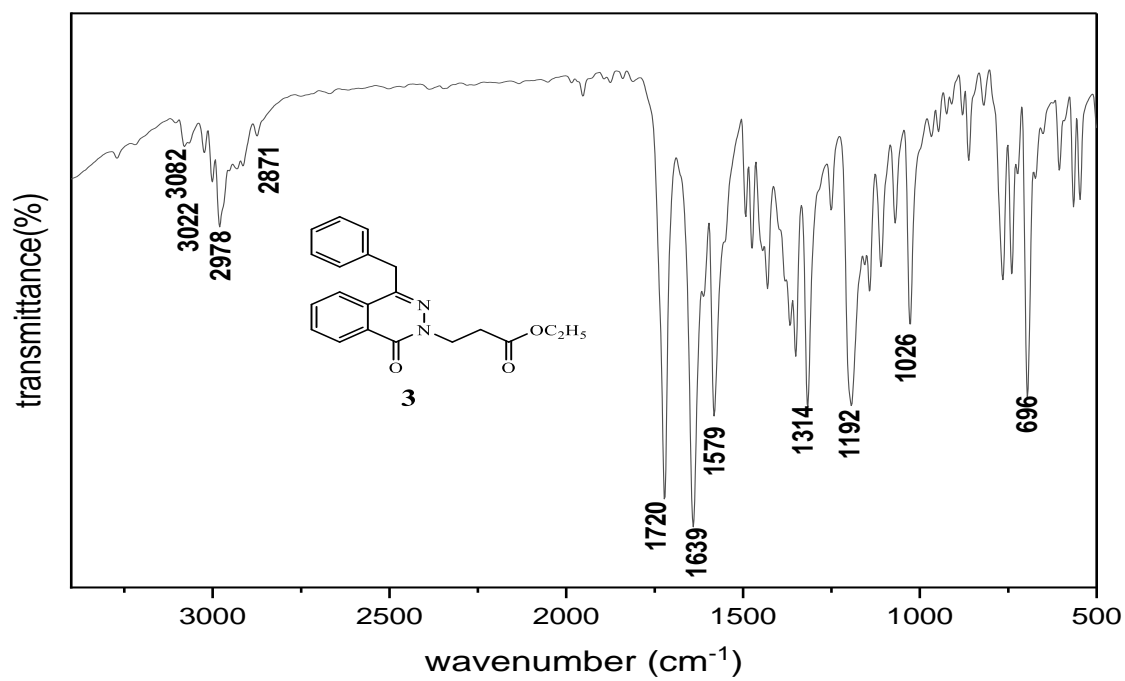

Figure S3 The IR spectrum of compound 3.

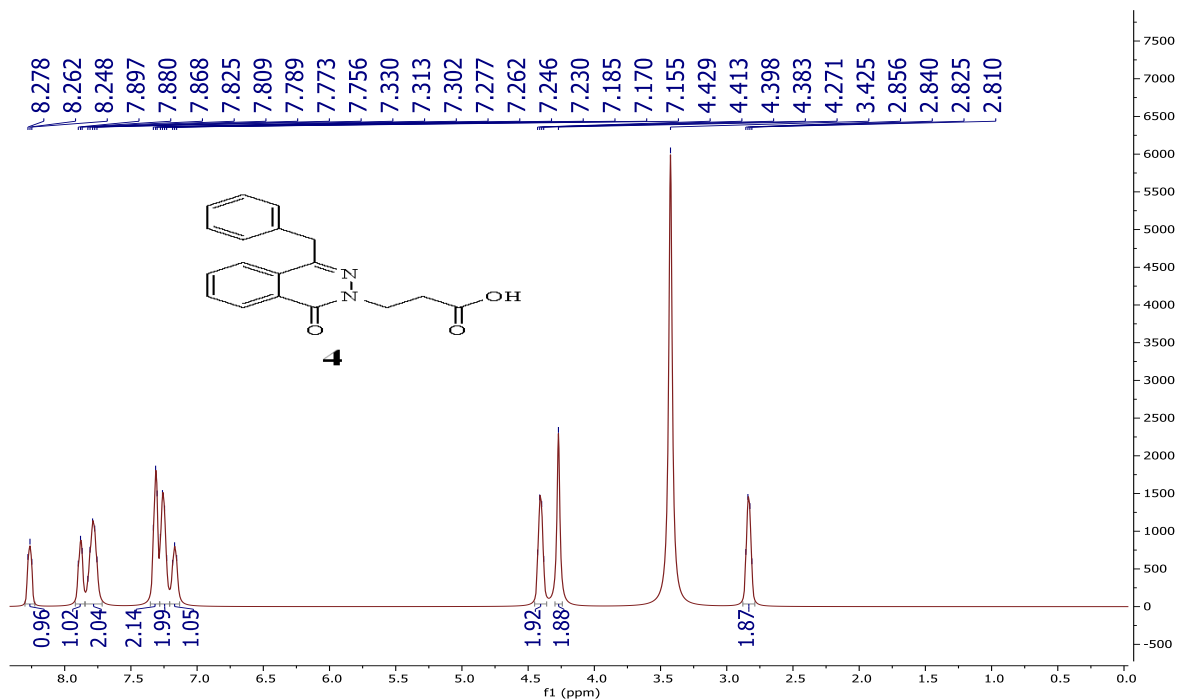

Figure S4 The <sup>1</sup>H-NMR spectrum of compound 4.

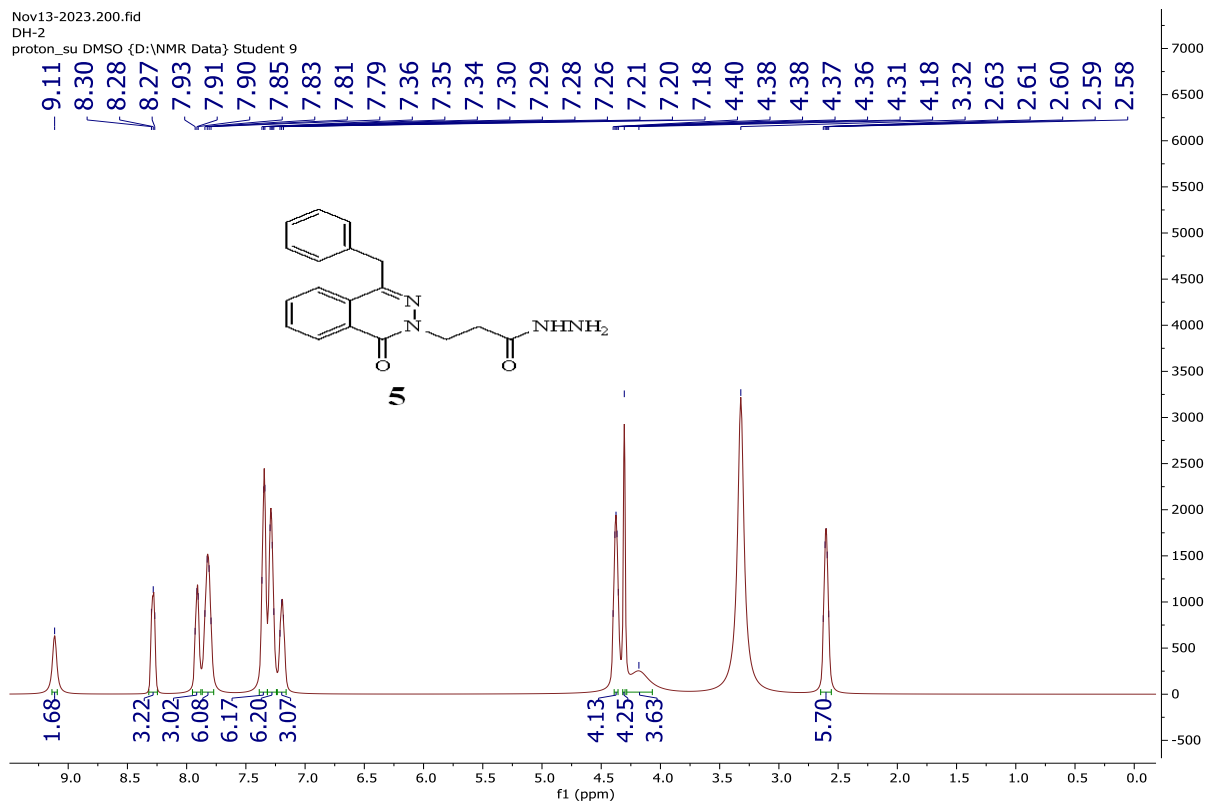

Figure S5 The  $^1\text{H}$ -NMR spectrum of compound 5.

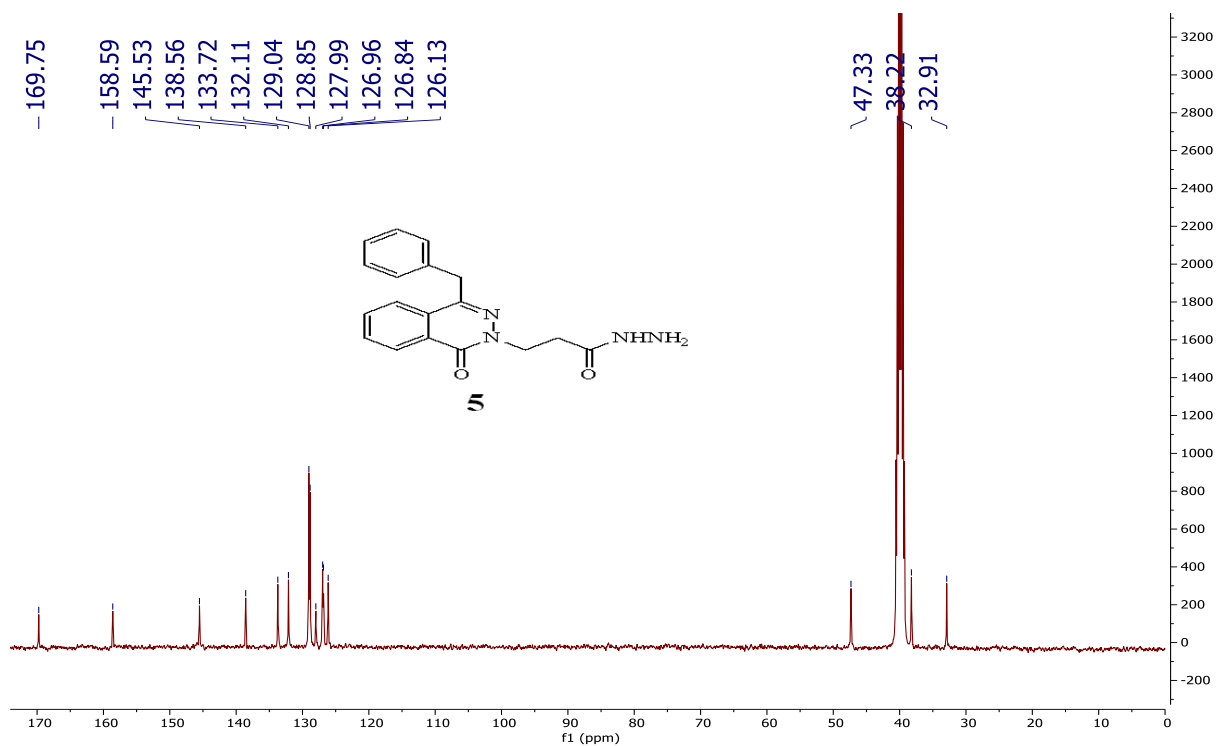

Figure S6 The  $^{13}\text{C}$ -NMR spectrum of compound 5.

Jan15-2024.150.fid  
DH-2  
D2O  
proton\_su DMSO (D:\NMR Data) Student 18

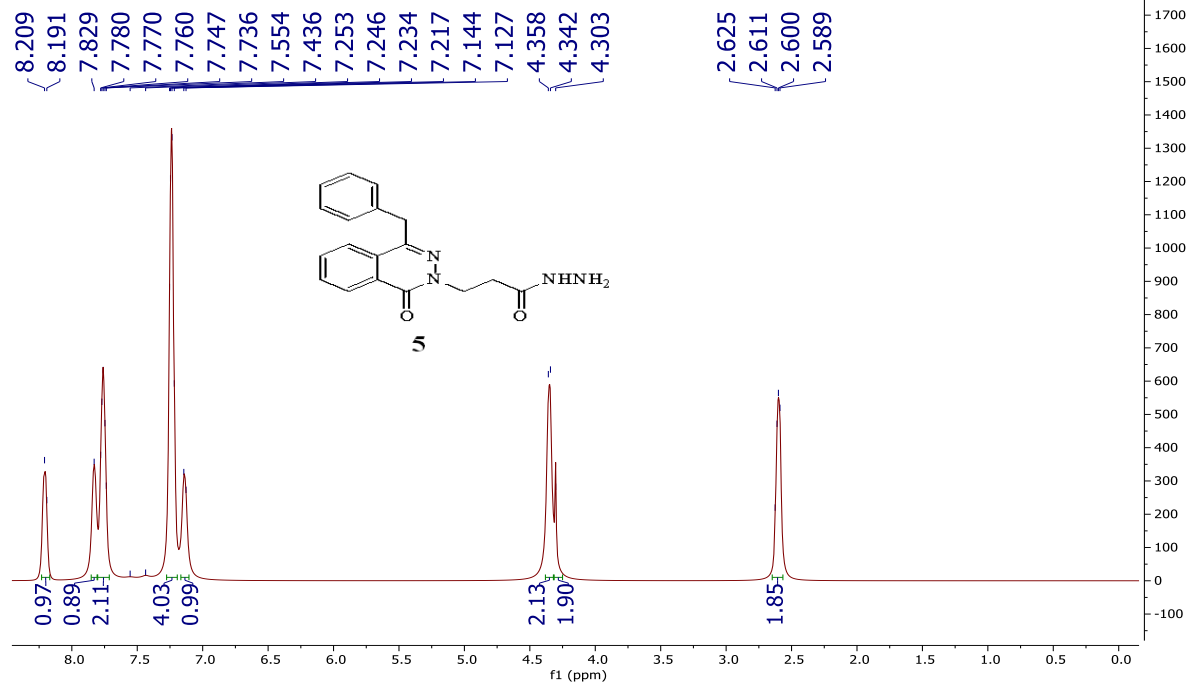

Figure S7 The D2O spectrum of compound 5.

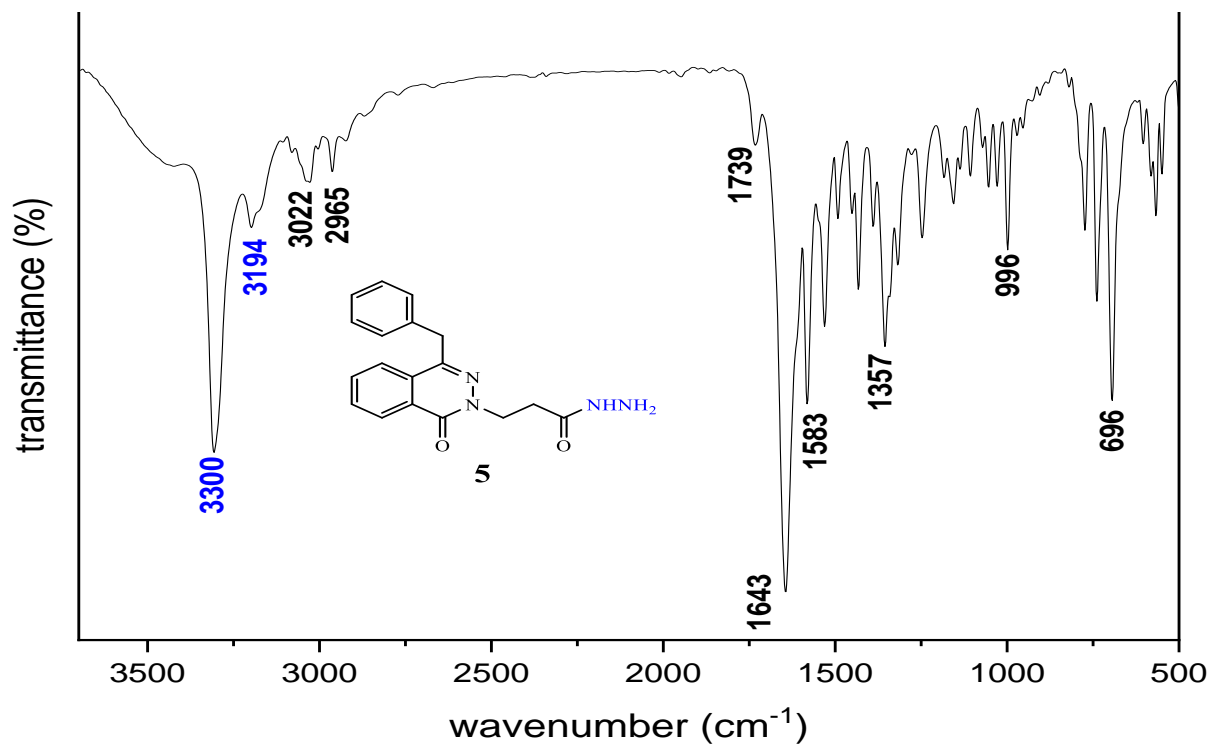

Figure S8 The IR spectrum of compound 5

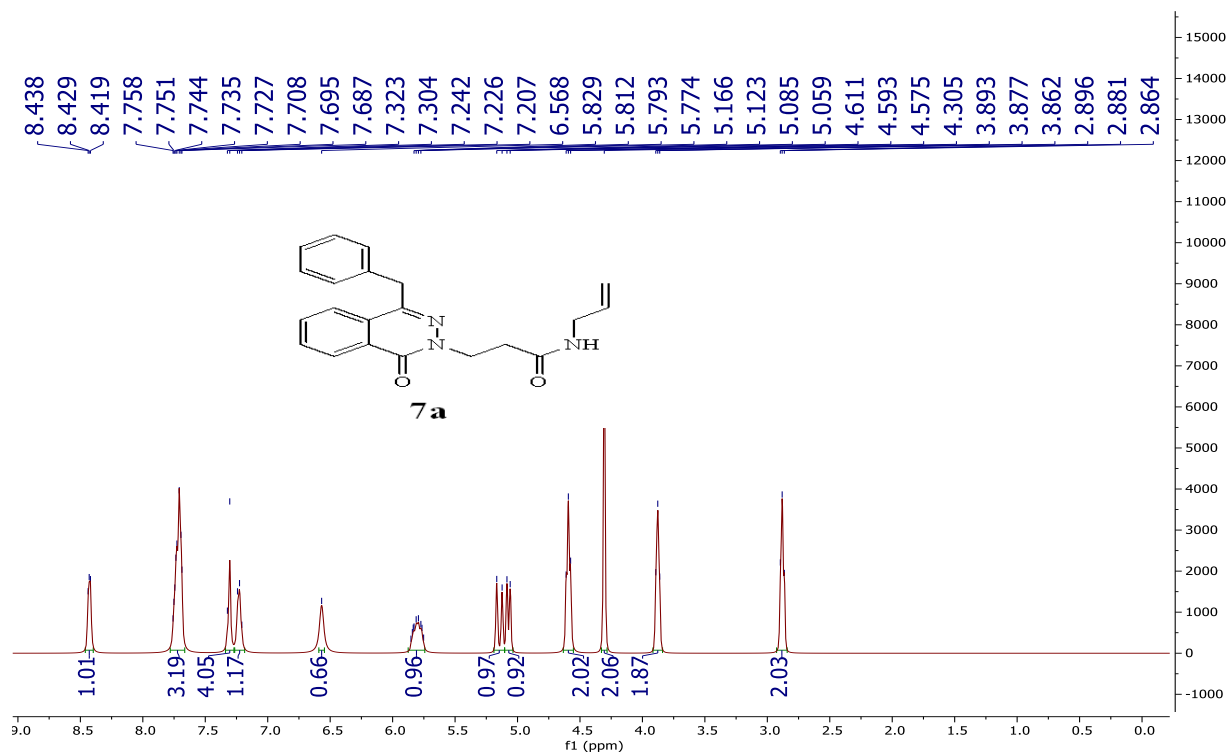

**Figure S9** The  $^1\text{H-NMR}$  spectrum of compound **7a**

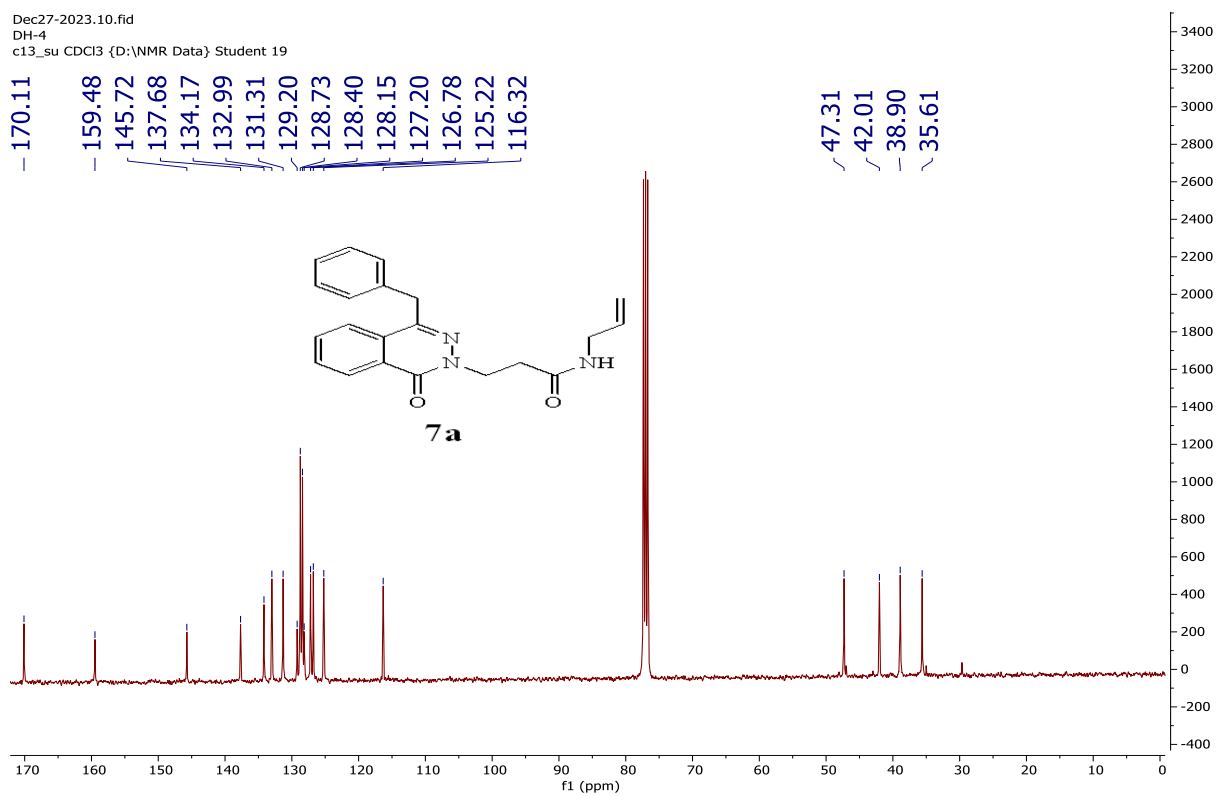

**Figure S10** The  $^{13}\text{C-NMR}$  spectrum of compound **7a**



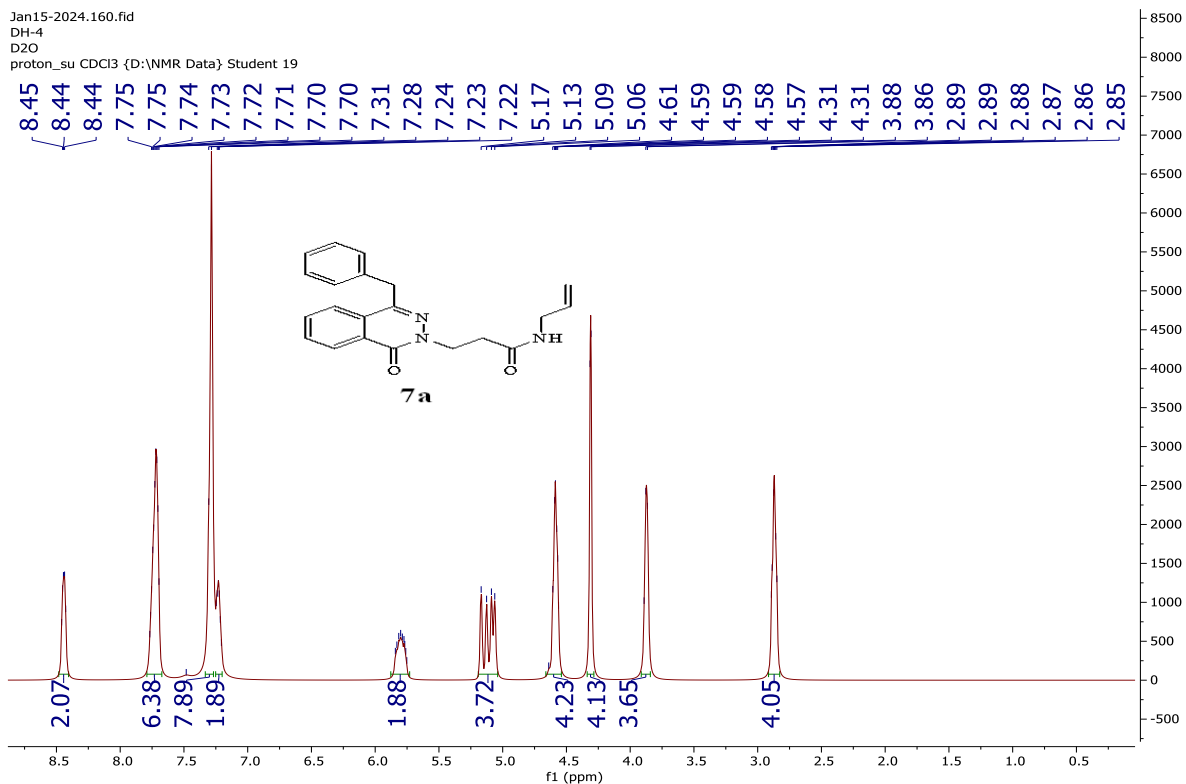

Figure S11 The D2O spectrum of compound 7a

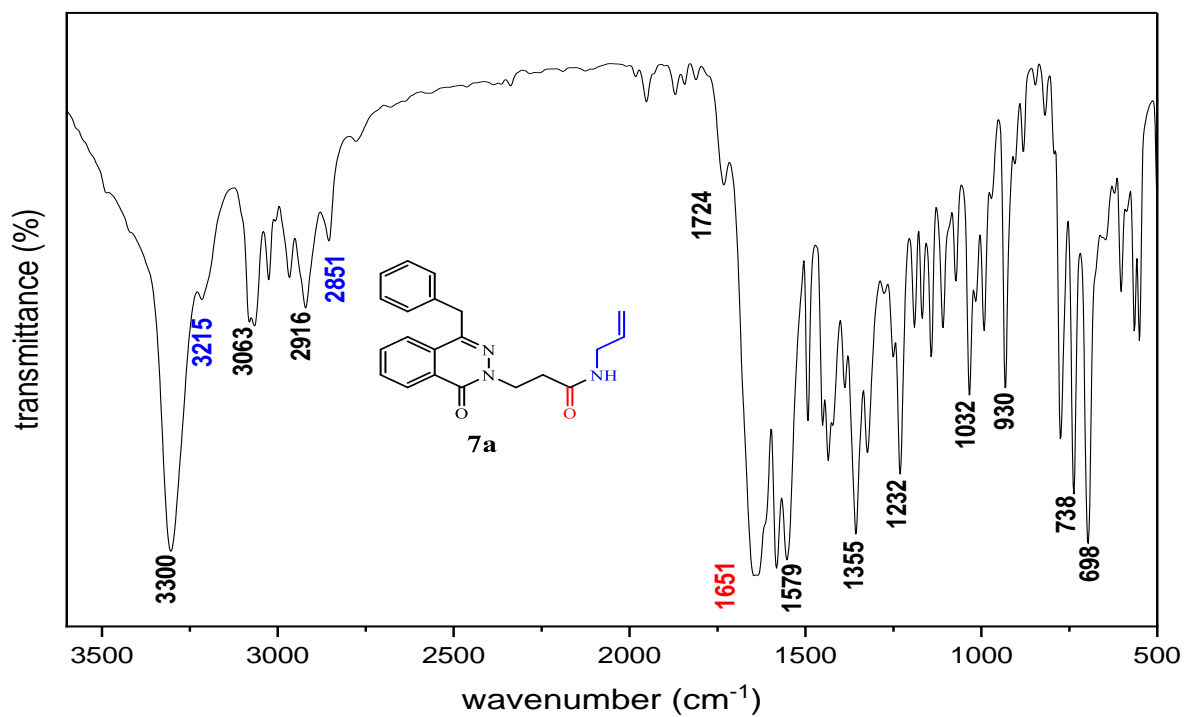

Figure S12 The IR spectrum of compound 7a

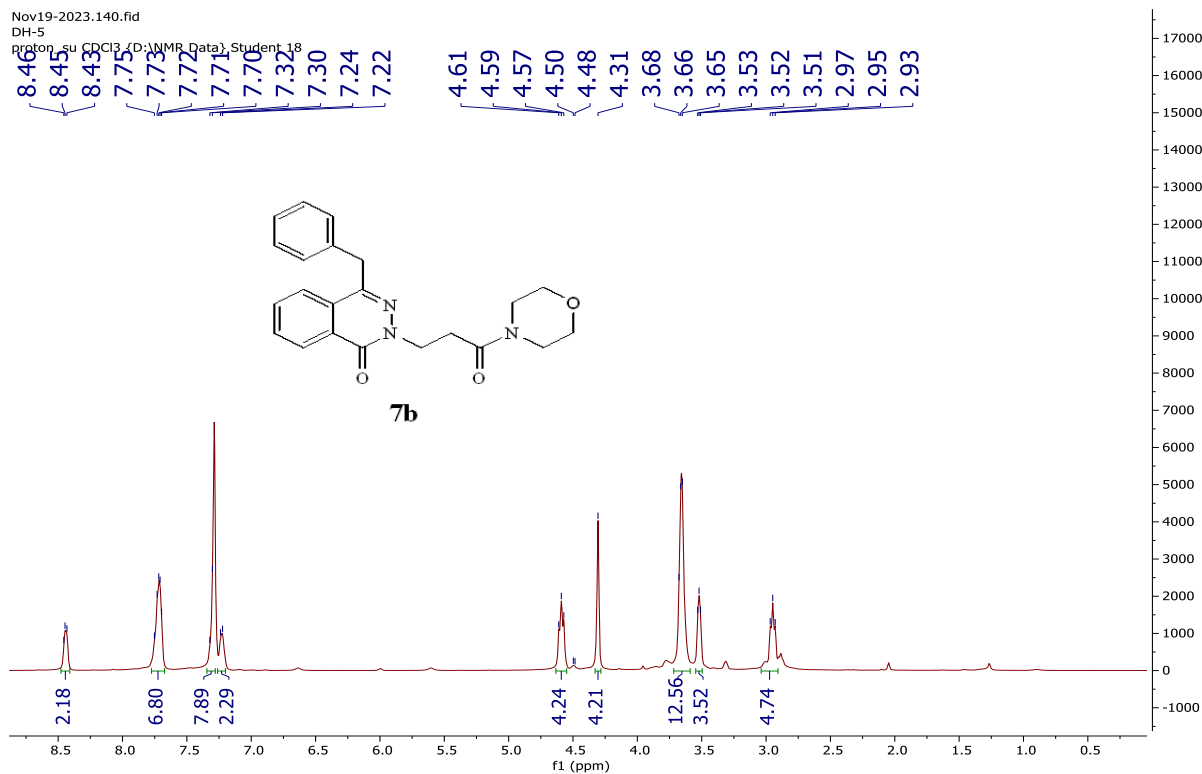

Figure S13 The  $^1\text{H}$ -NMR spectrum of compound **7b**

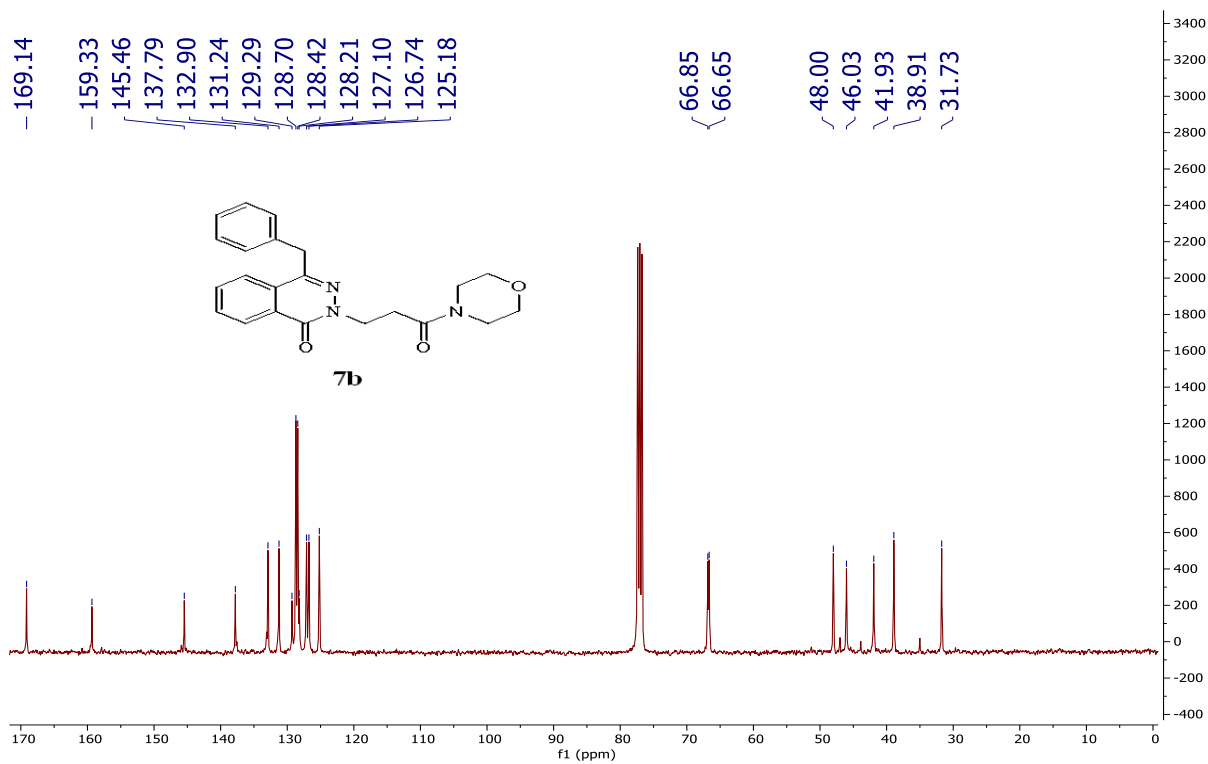

Figure S14 The  $^{13}\text{C}$ -NMR spectrum of compound **7b**

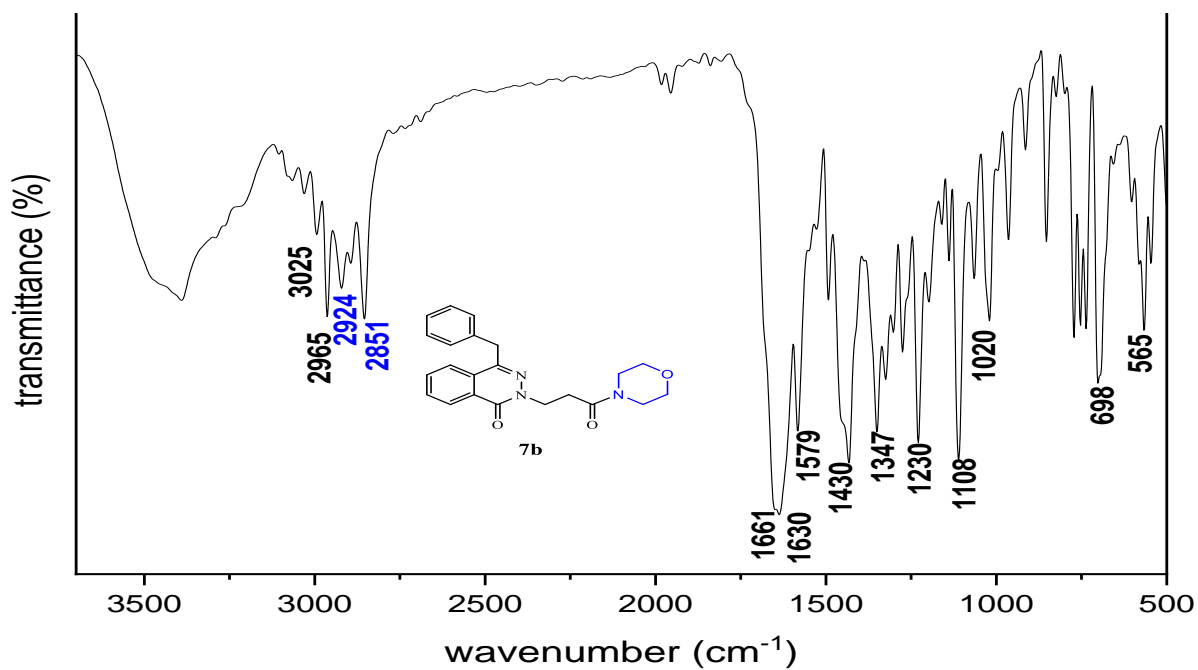

Figure S15 The IR spectrum of compound 7b

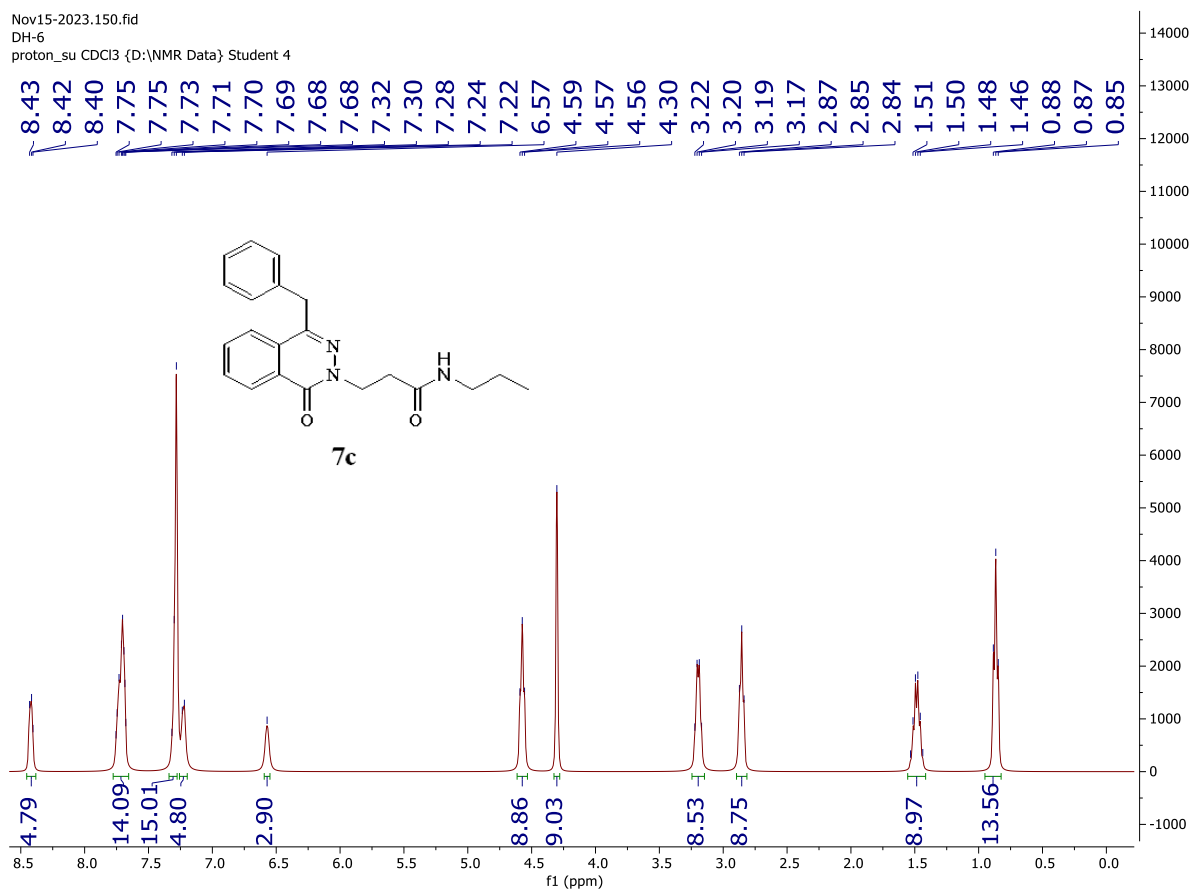

Figure S16 The <sup>1</sup>H-NMR spectrum of compound 7c

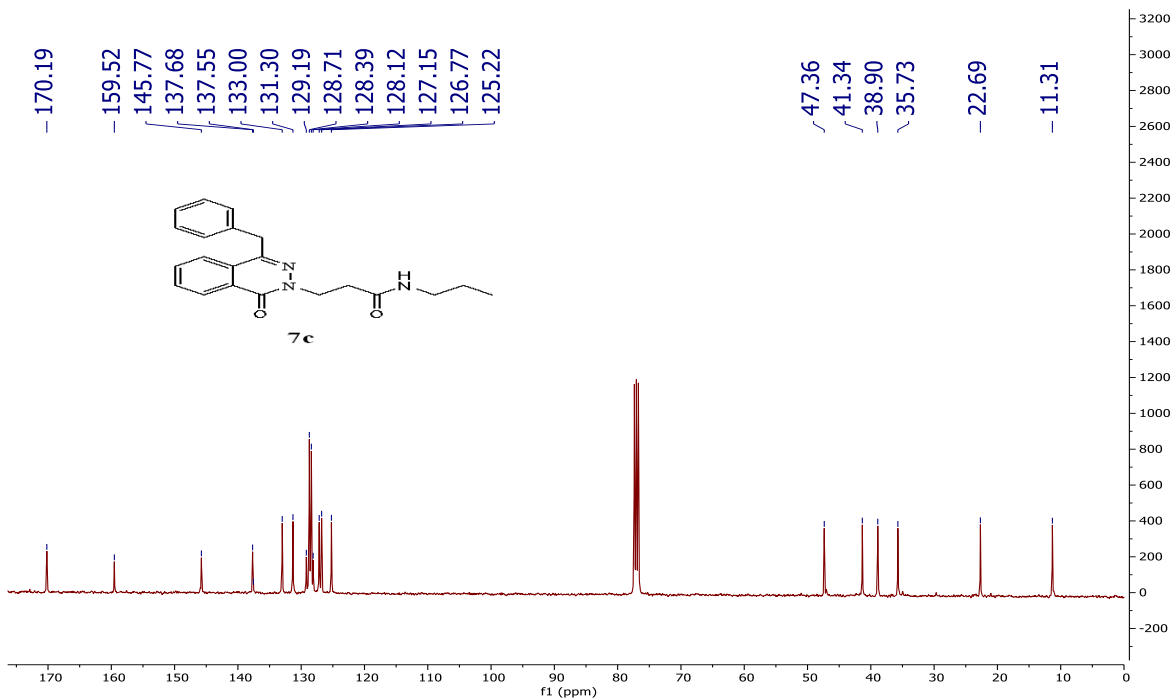

Figure S17 The <sup>13</sup>C-NMR spectrum of compound 7c

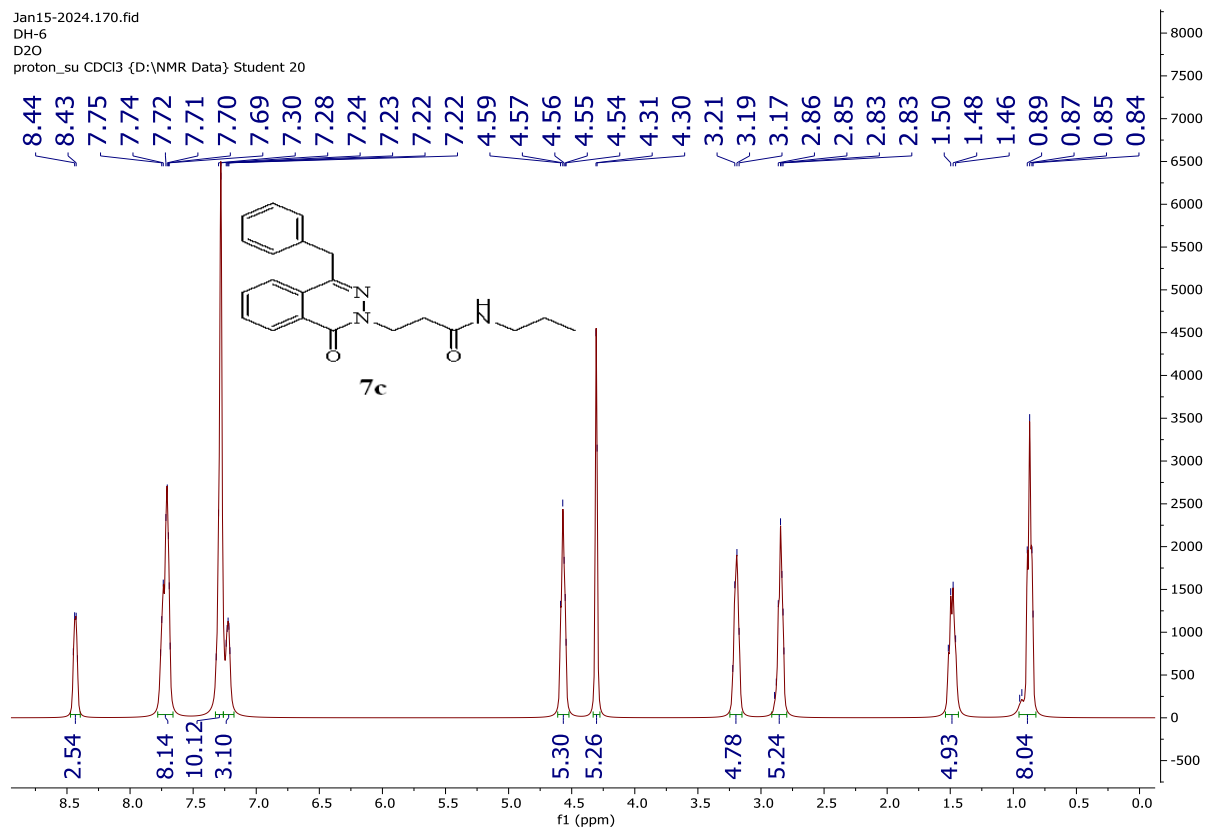

Figure S18 The D<sub>2</sub>O spectrum of compound 7c

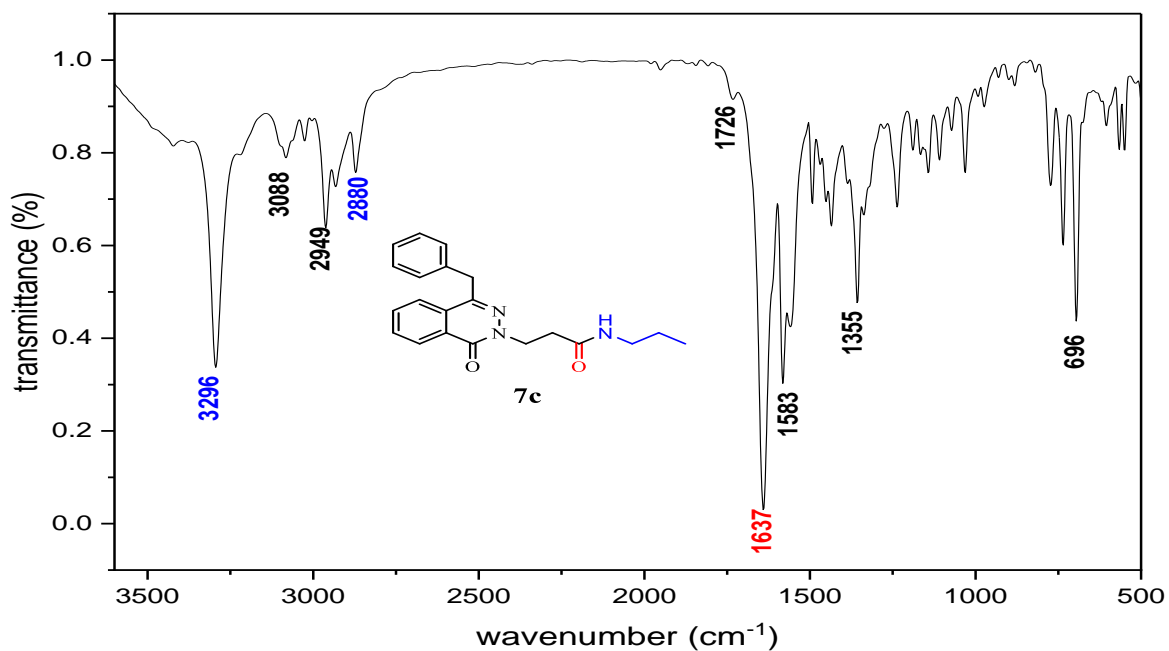

Figure S19 The IR spectrum of compound 7c

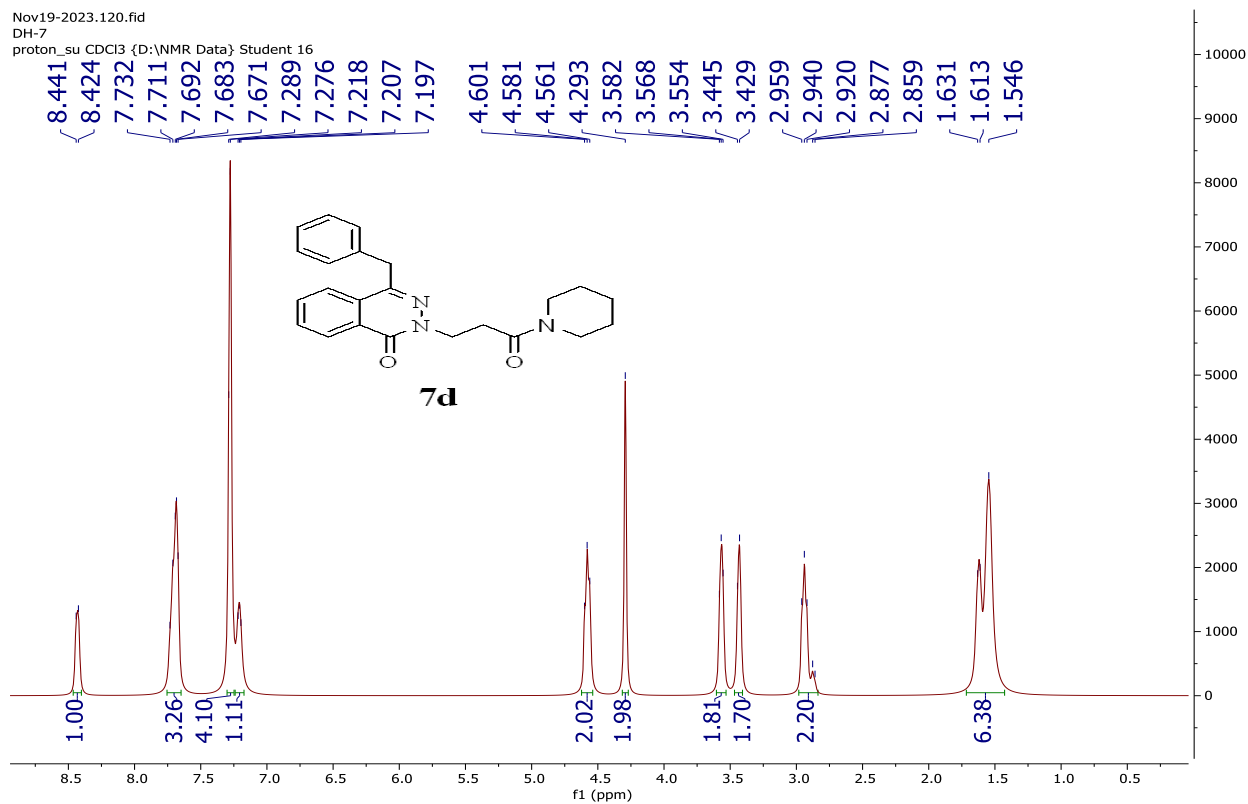

Figure S20 The <sup>1</sup>H-NMR spectrum of compound 7d

Dec26-2023.30.fid  
DH-7  
c13\_su CDCl3 {D:\NMR Data} Student 14

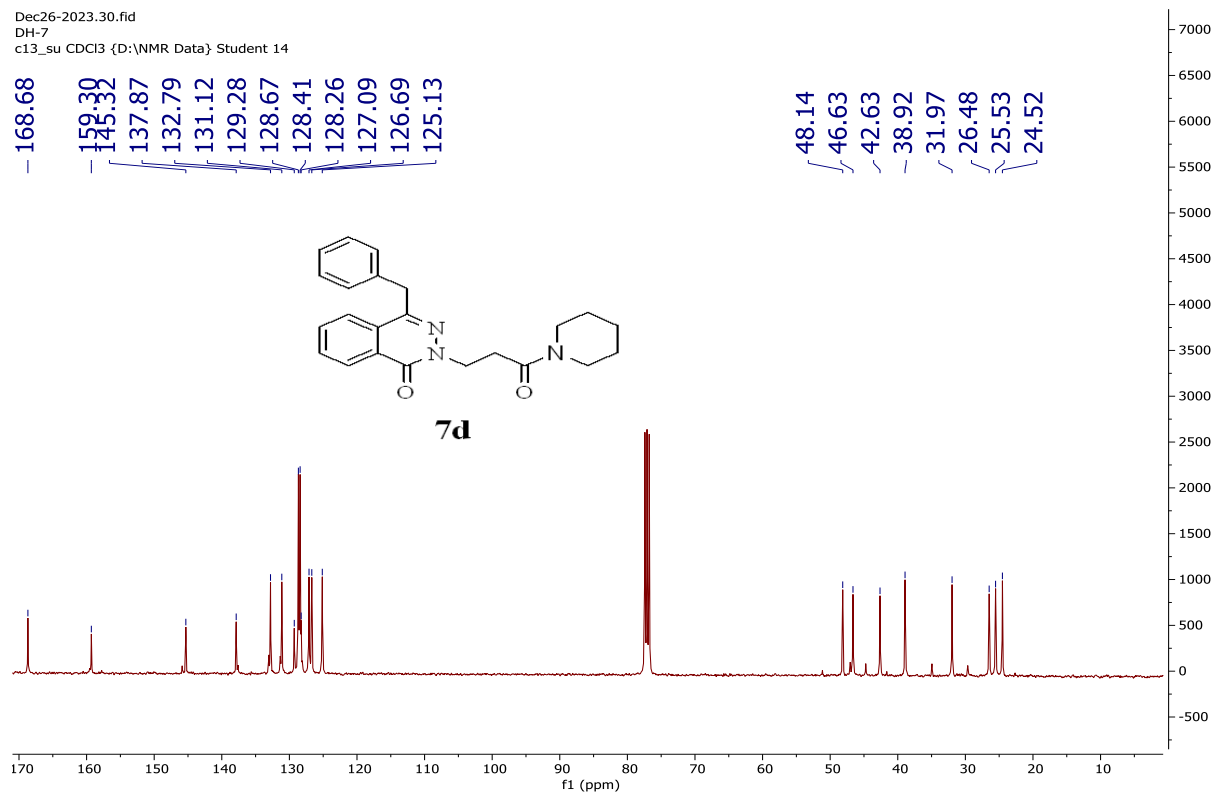

Figure S21 The <sup>13</sup>C-NMR spectrum of compound 7d

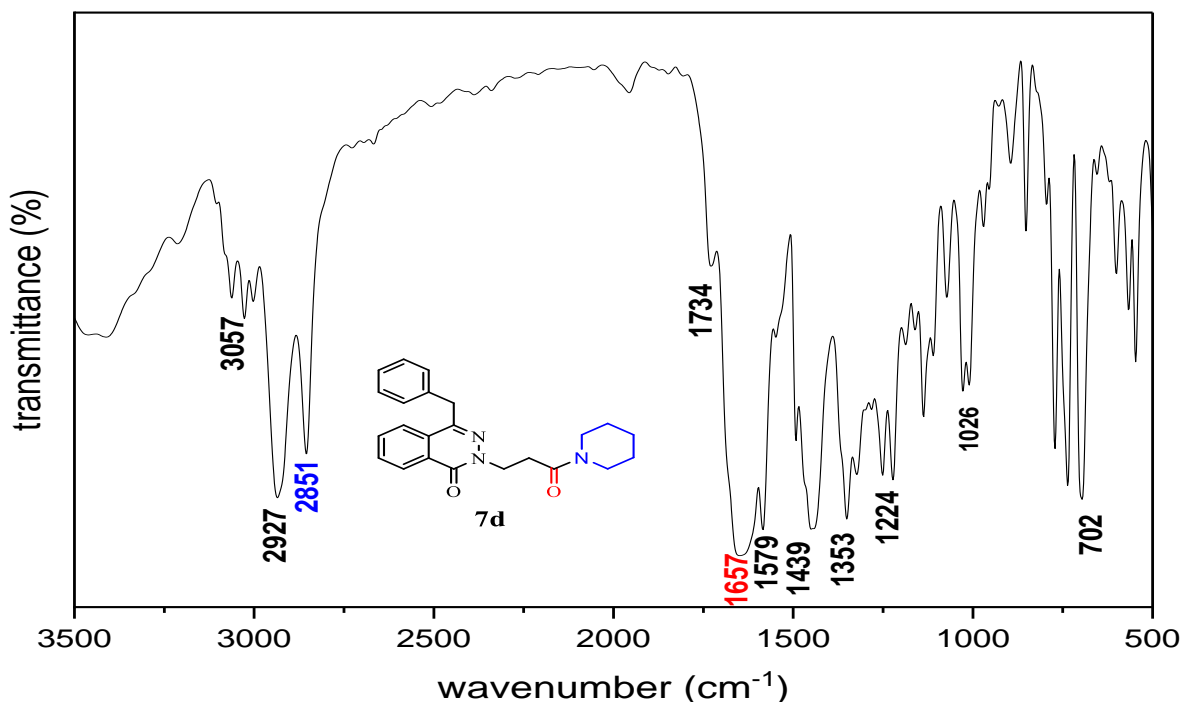

Figure S22 The IR spectrum of compound 7d

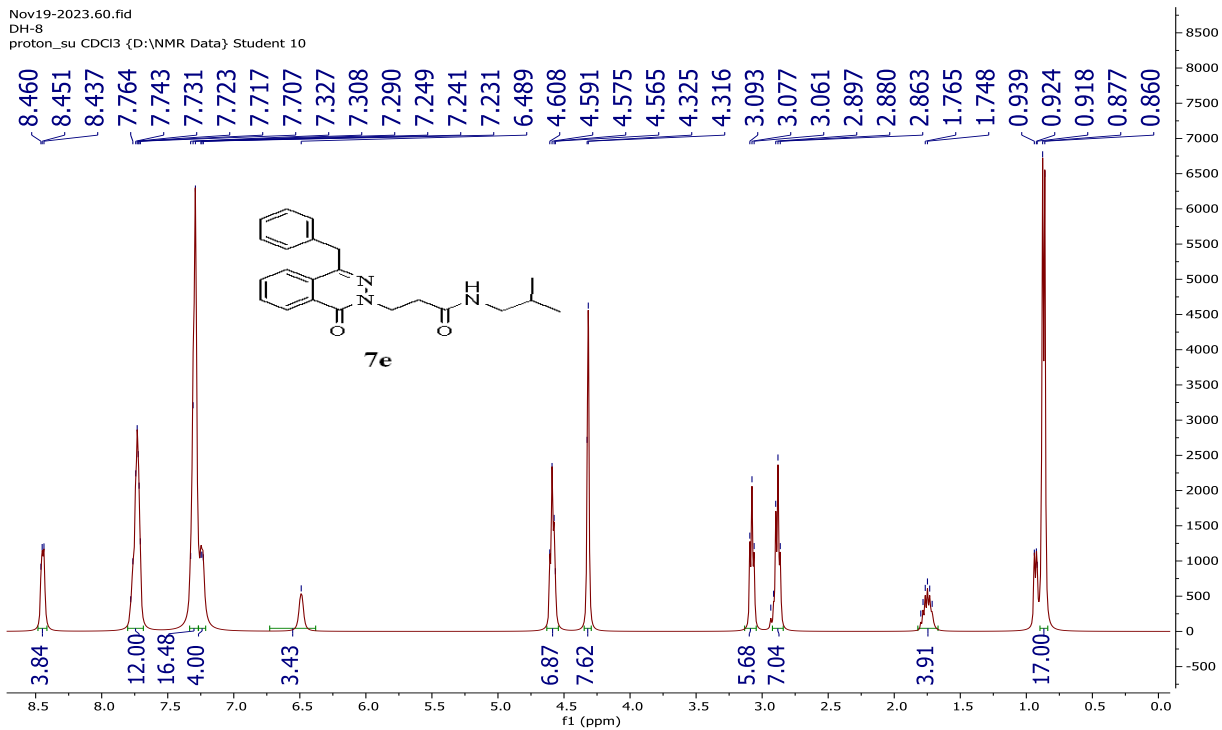

Figure S23 The  $^1\text{H}$ -NMR spectrum of compound **7e**

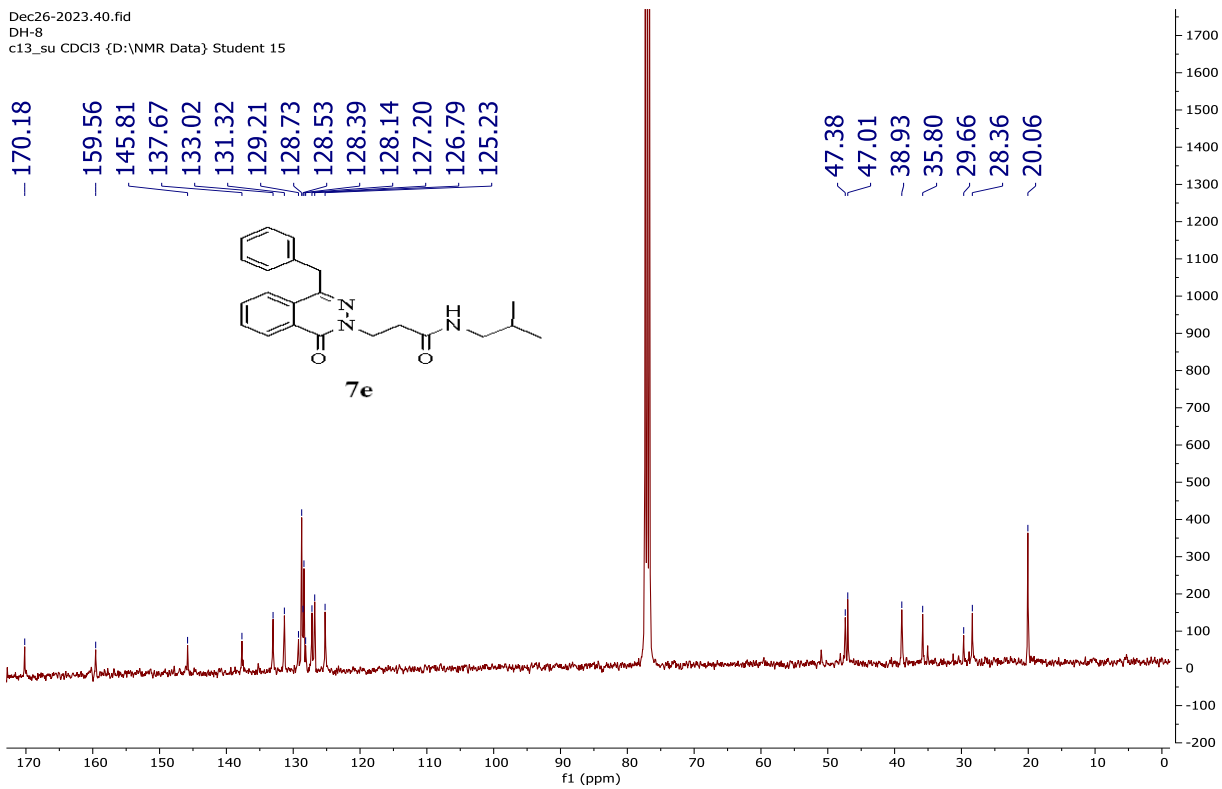

Figure S24 The  $^{13}\text{C}$ -NMR spectrum of compound **7e**

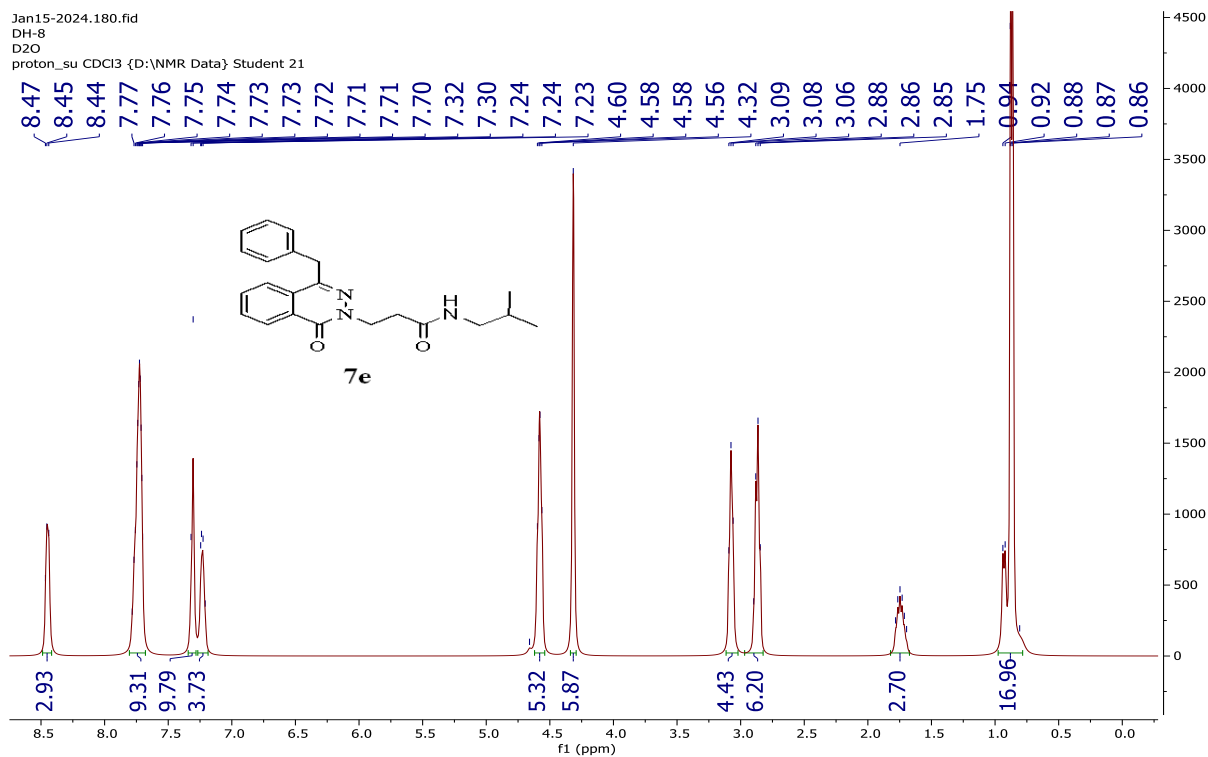

Figure S25 The D2O spectrum of compound 7e

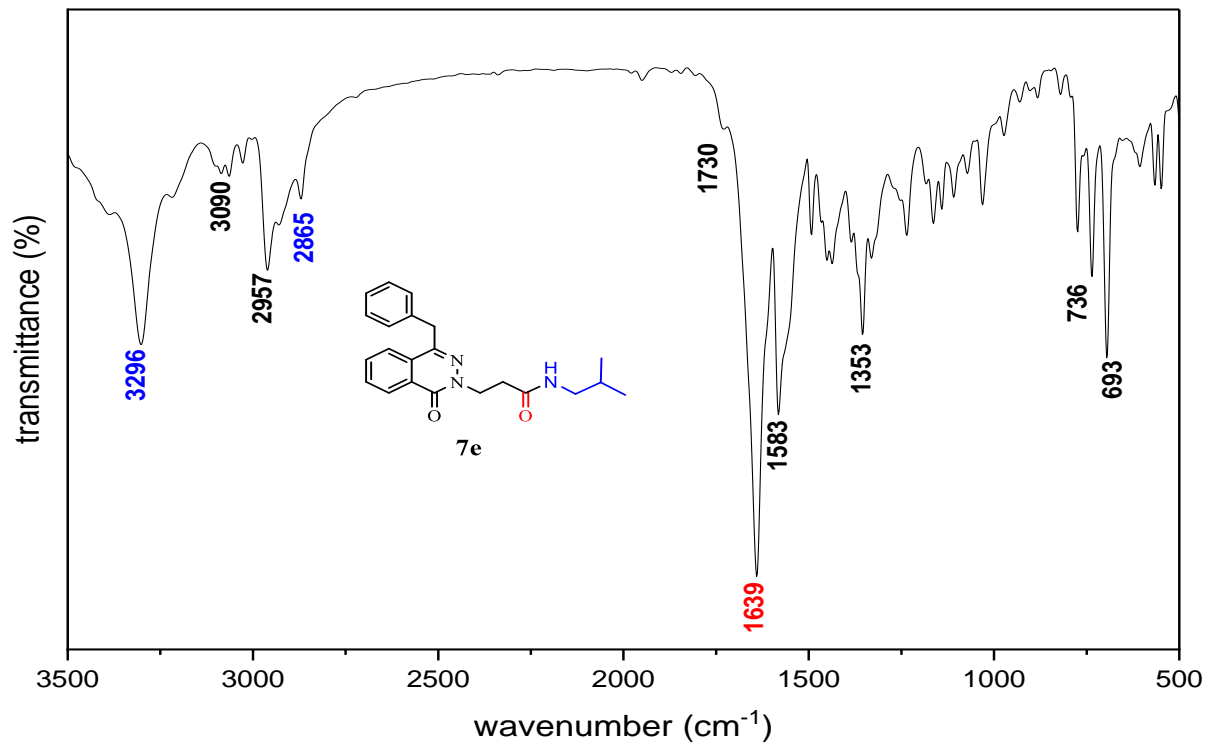

Figure S26 The IR spectrum of compound 7e



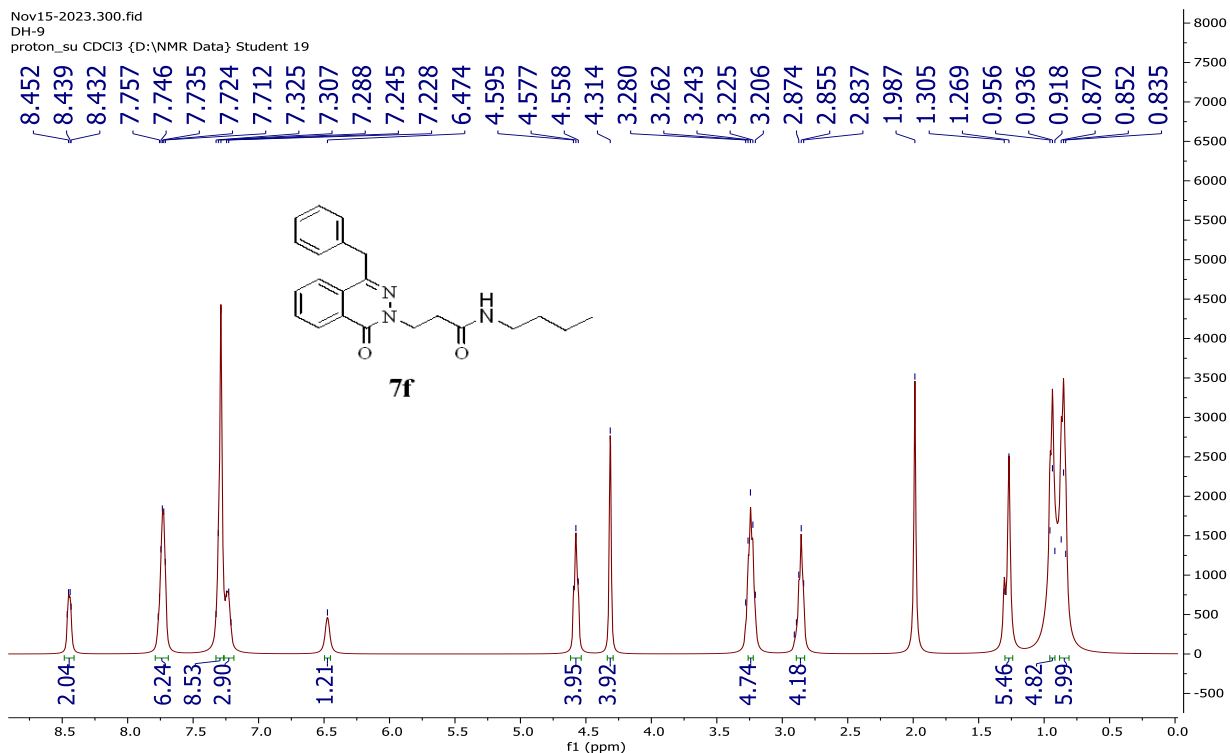

Figure S27 The  $^1\text{H}$ -NMR spectrum of compound **7f**

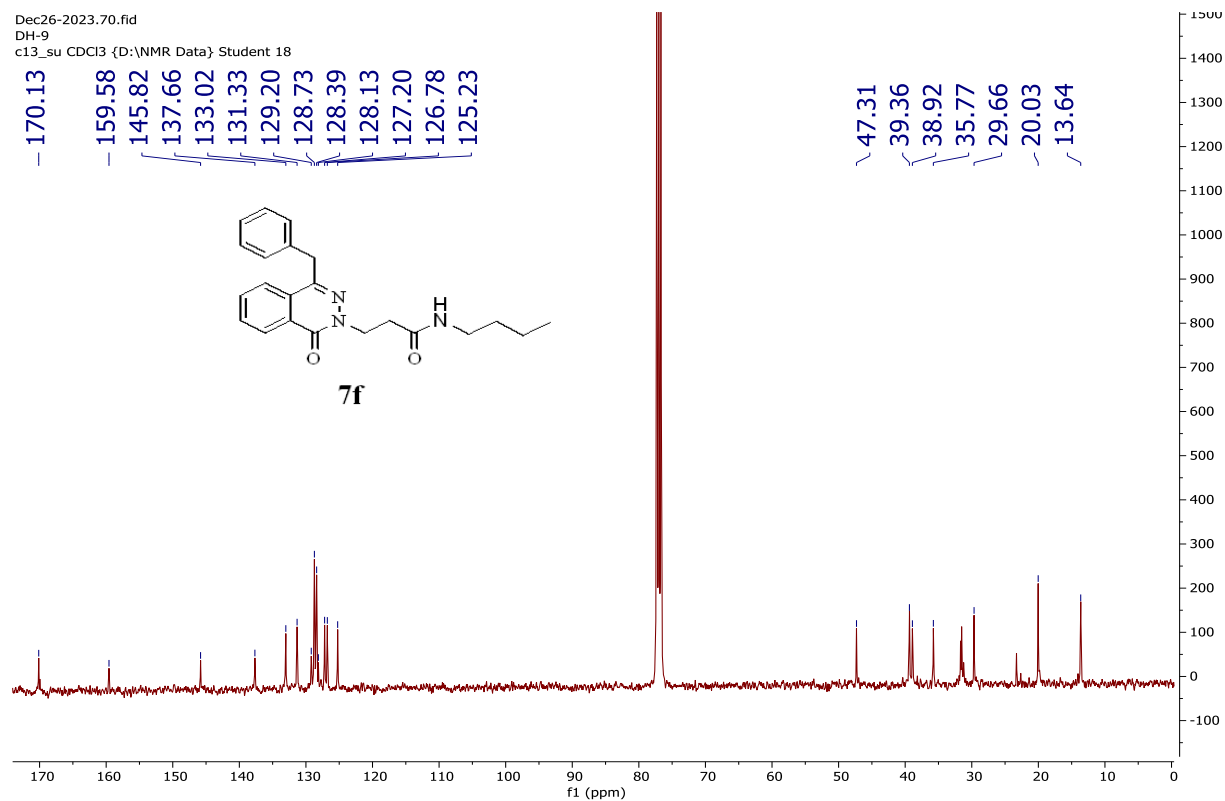

Figure S28 The  $^{13}\text{C}$ -NMR spectrum of compound **7f**

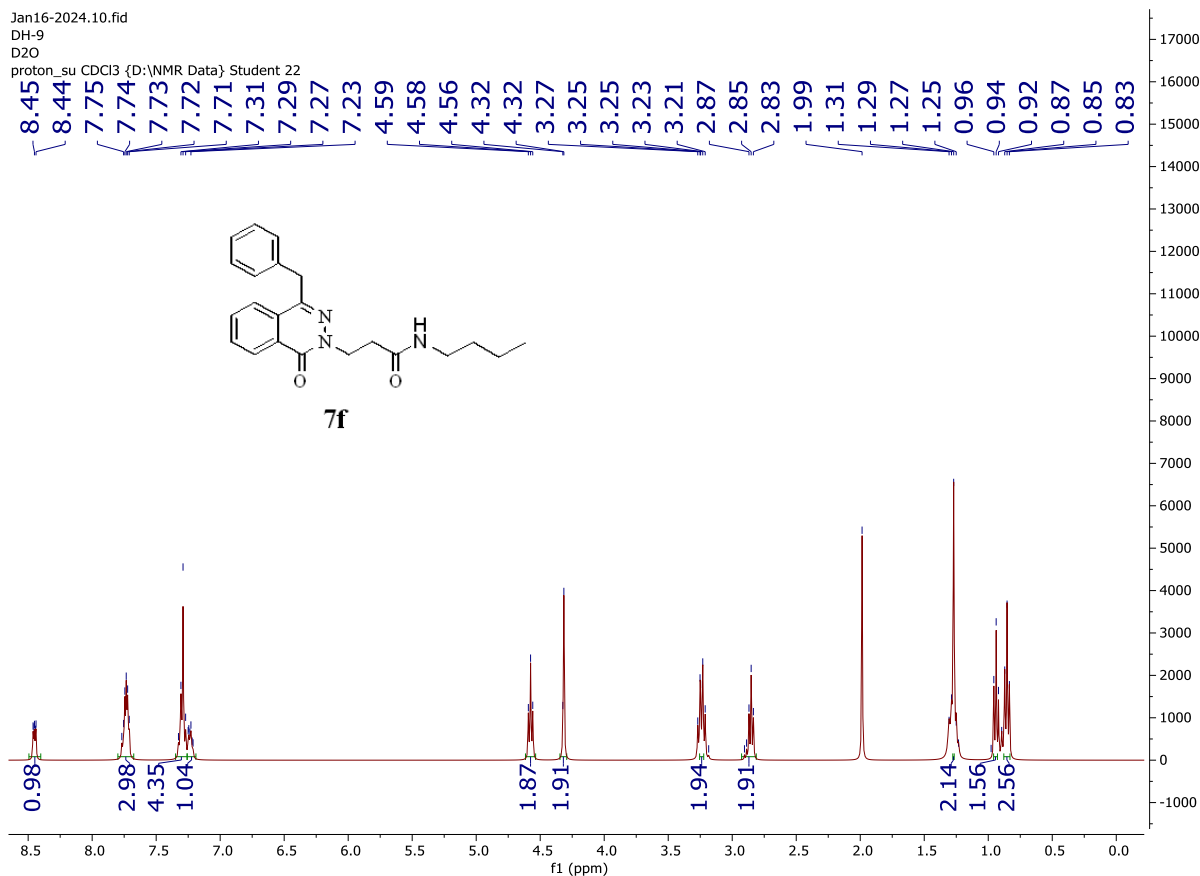

Figure S29 The D2O spectrum of compound 7f

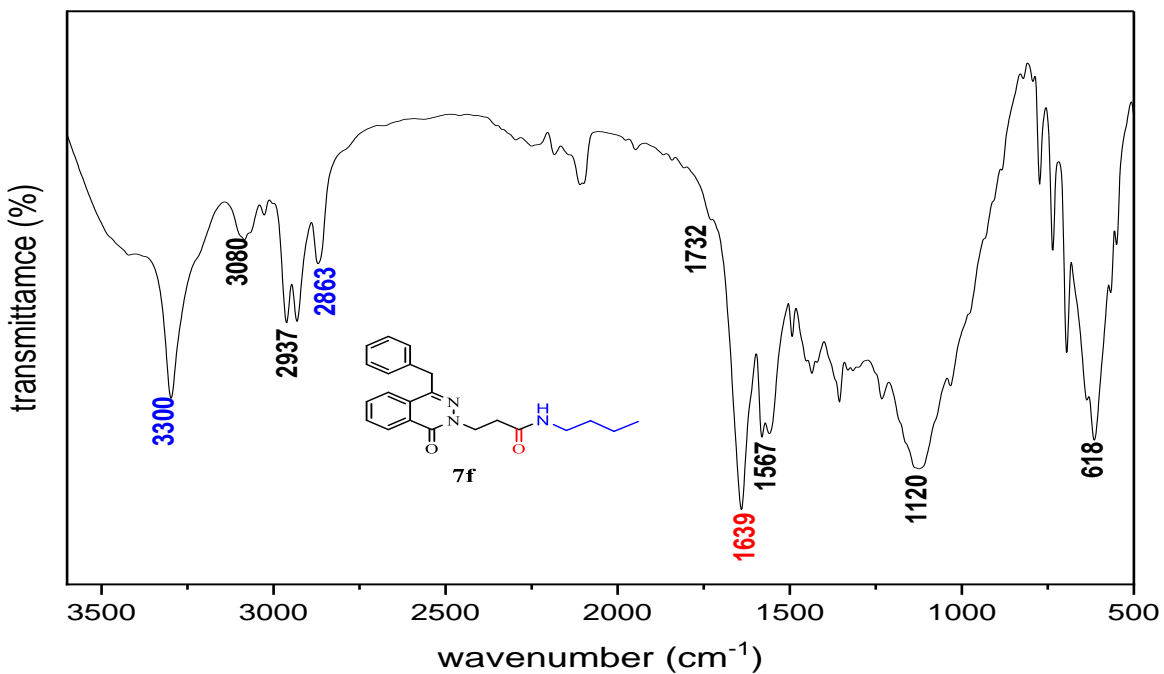

Figure S30 The IR spectrum of compound 7f

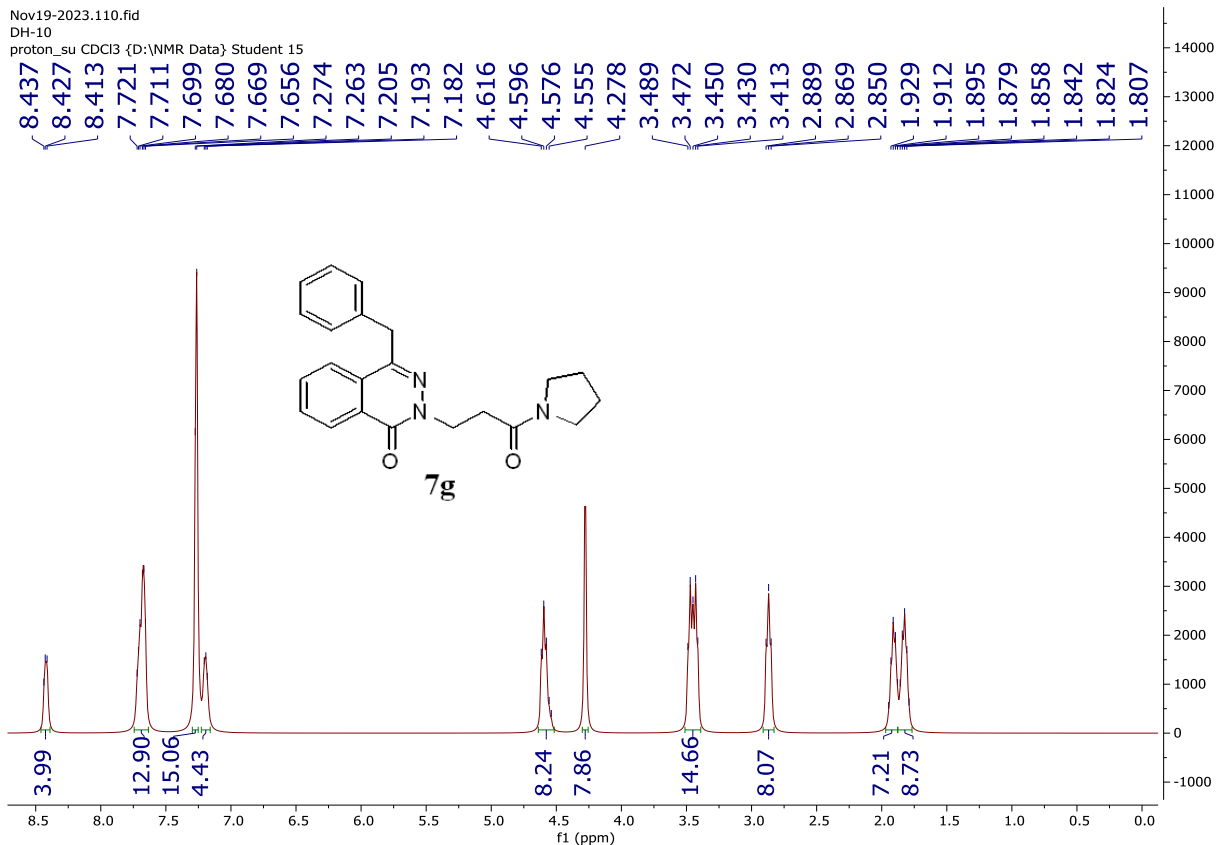

**Figure S31** The  $^1\text{H}$ -NMR spectrum of compound **7g**

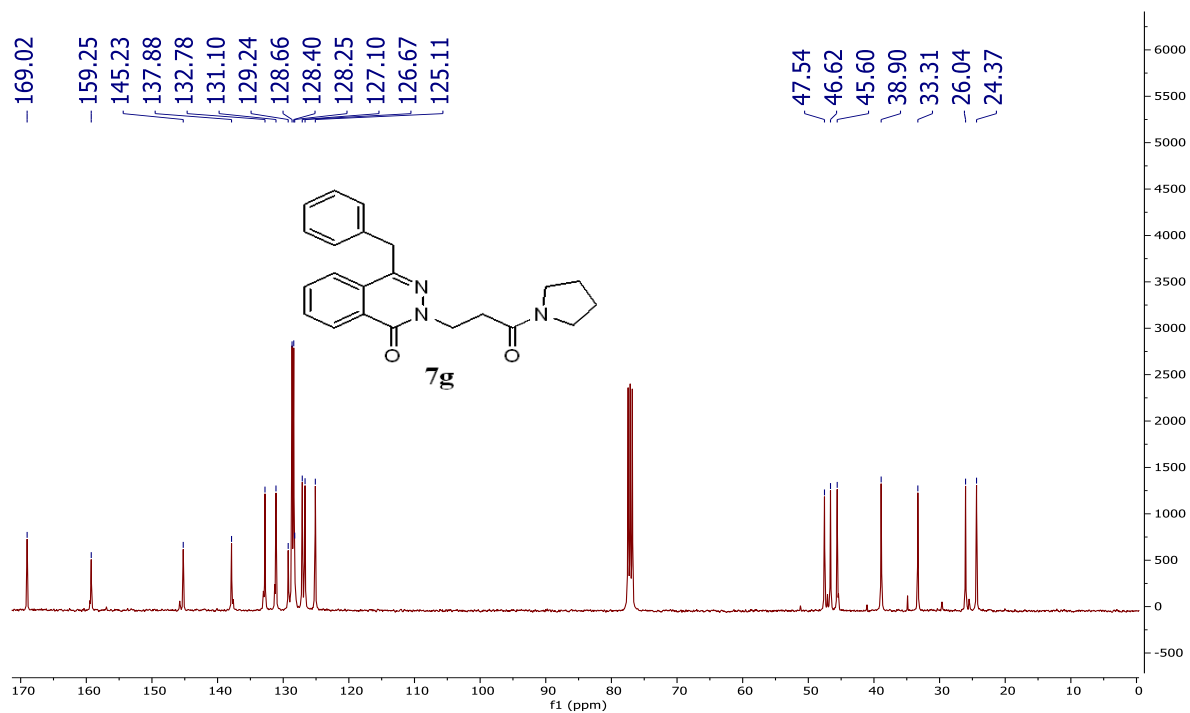

**Figure S32** The  $^{13}\text{C}$ -NMR spectrum of compound **7g**

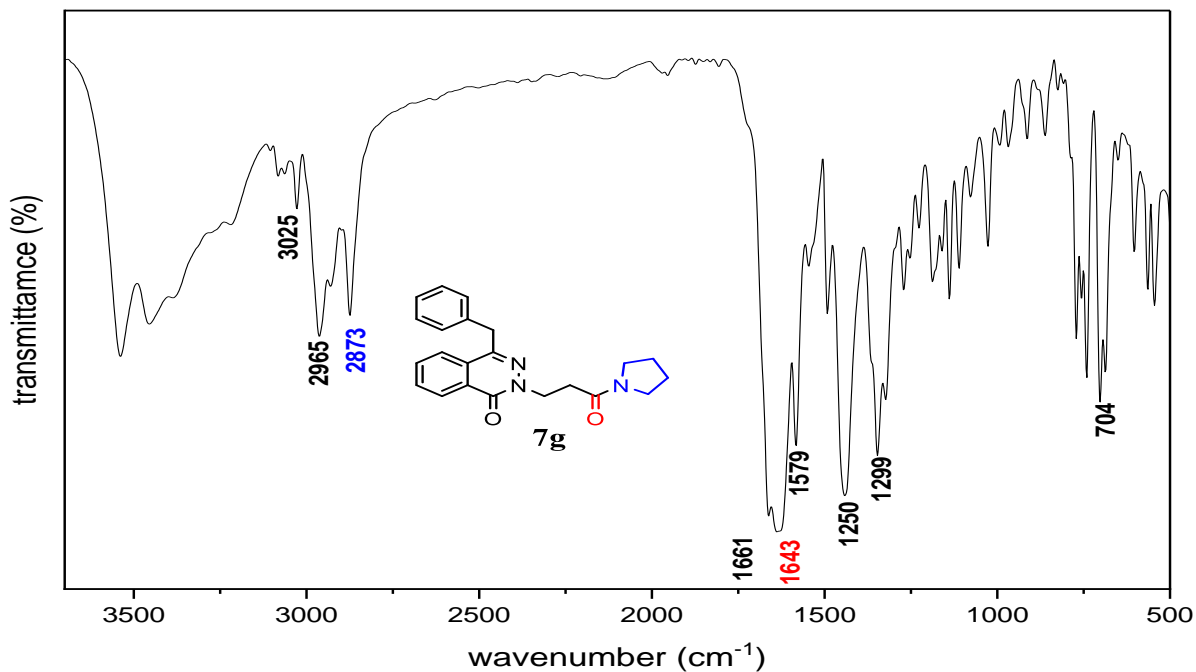

Figure S33 The IR spectrum of compound 7g

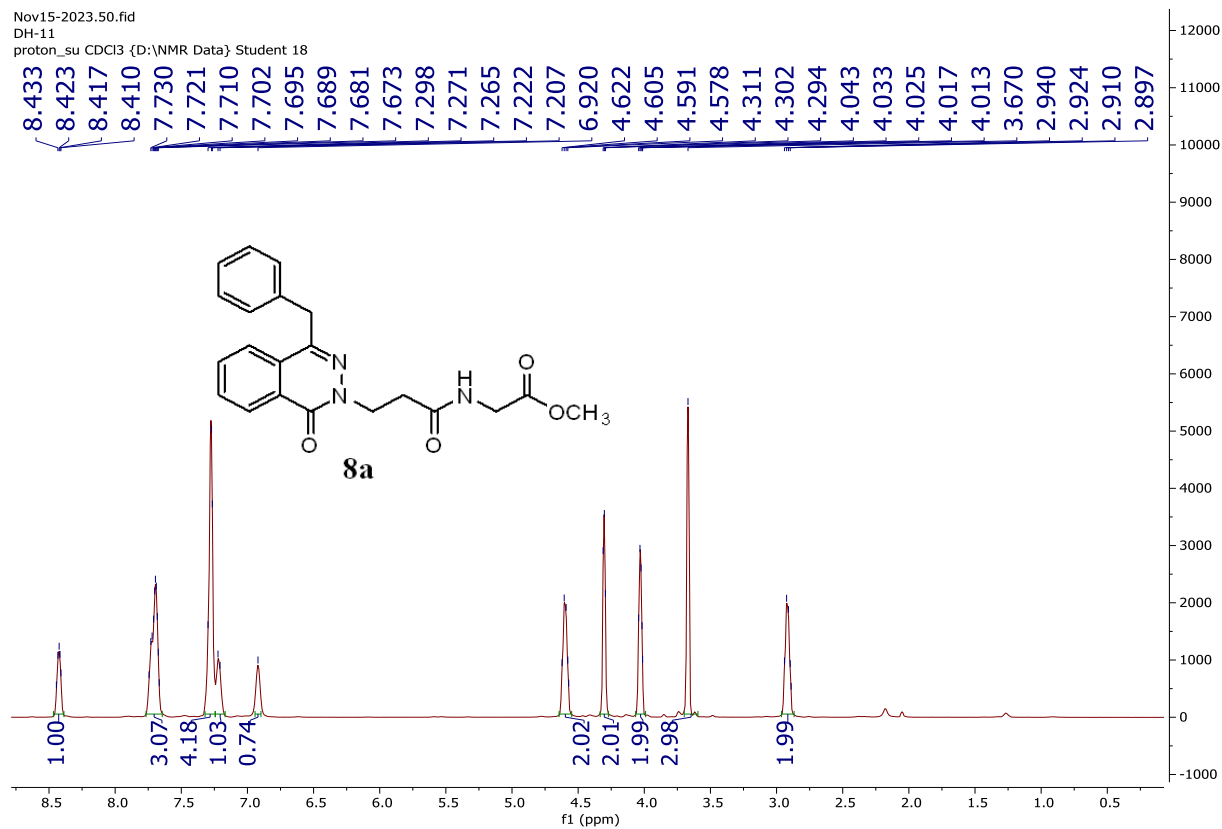

Figure S34 The <sup>1</sup>H-NMR spectrum of compound 8a

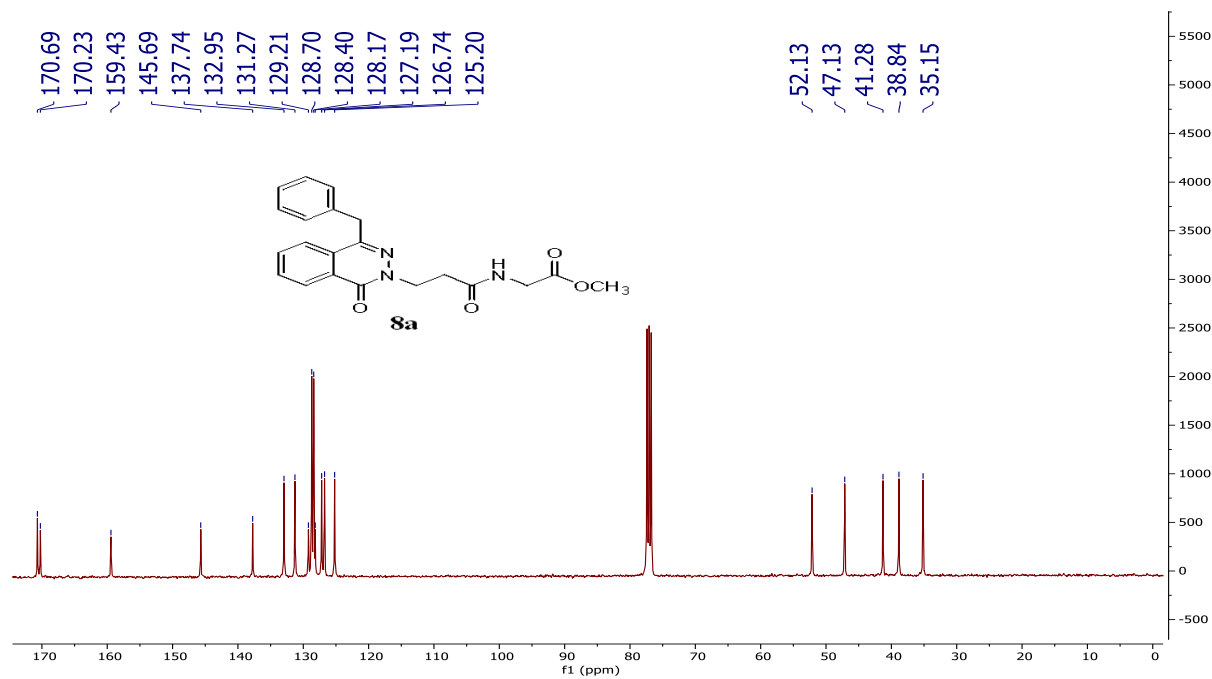

Figure S35 The <sup>13</sup>C-NMR spectrum of compound **8a**

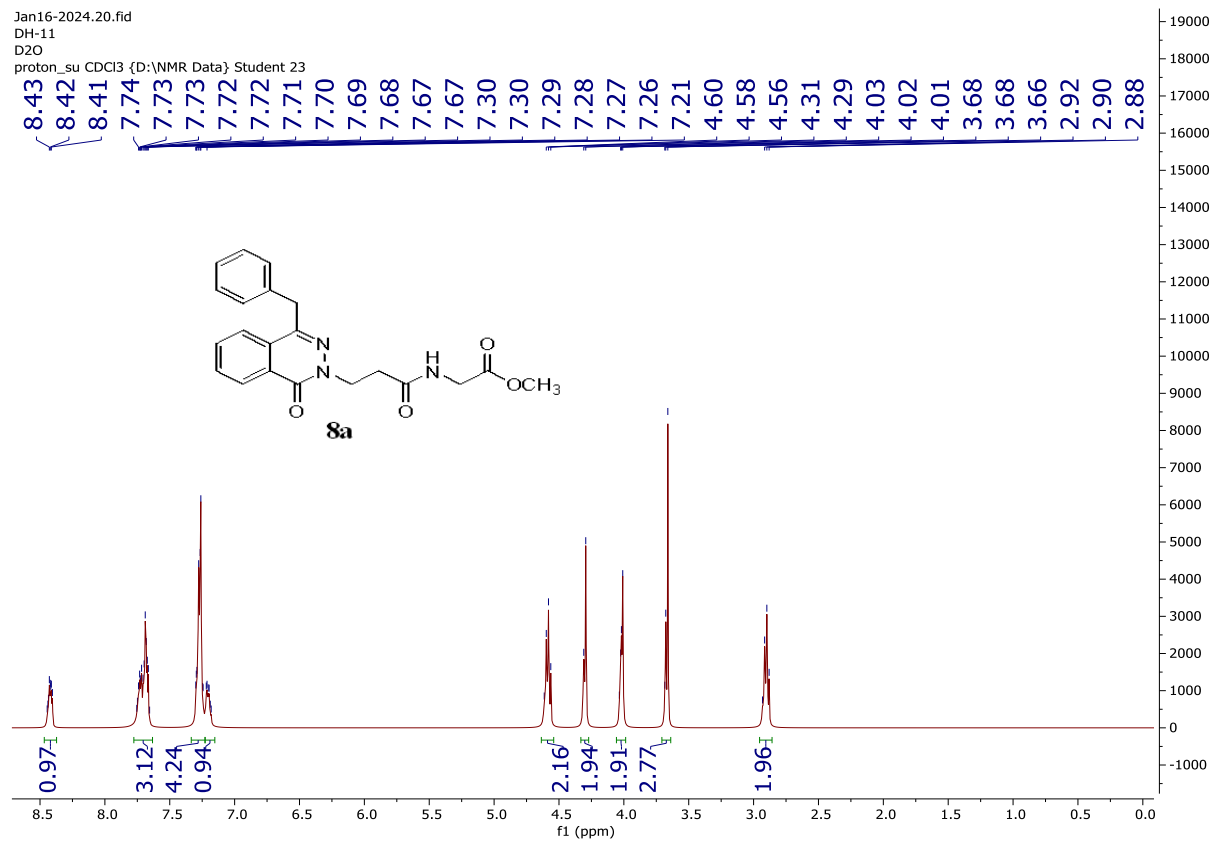

Figure S36 The D<sub>2</sub>O spectrum of compound **8a**

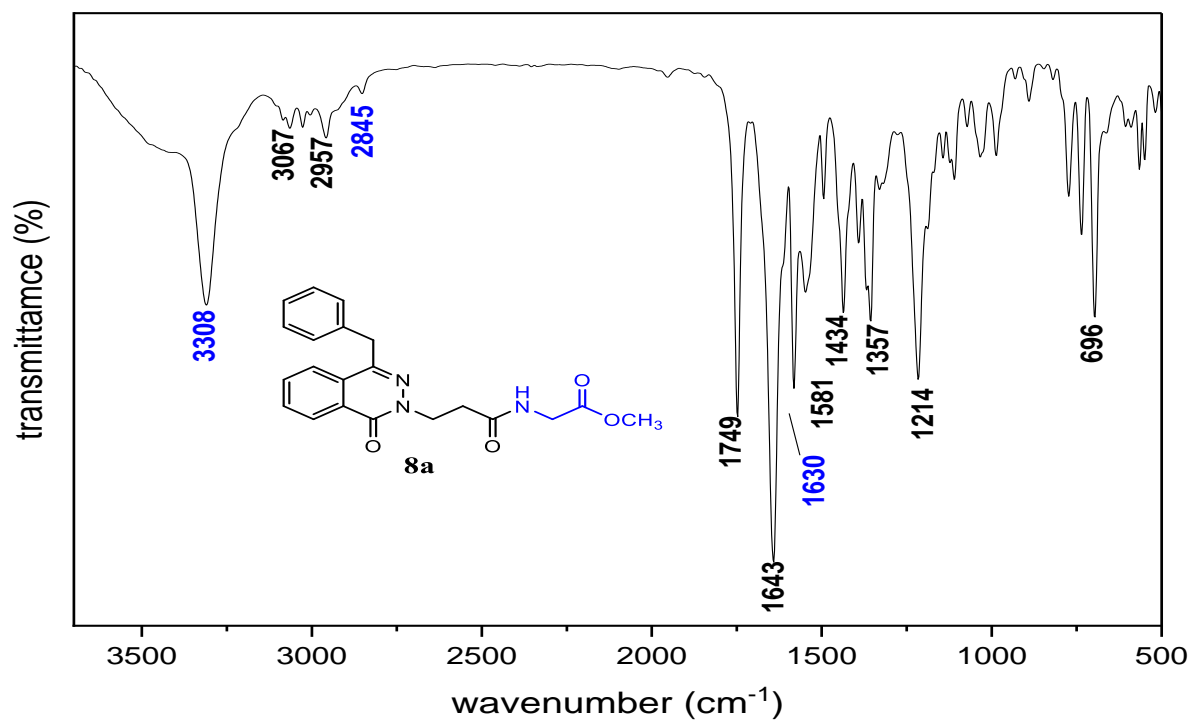

Figure S37 The IR spectrum of compound **8a**

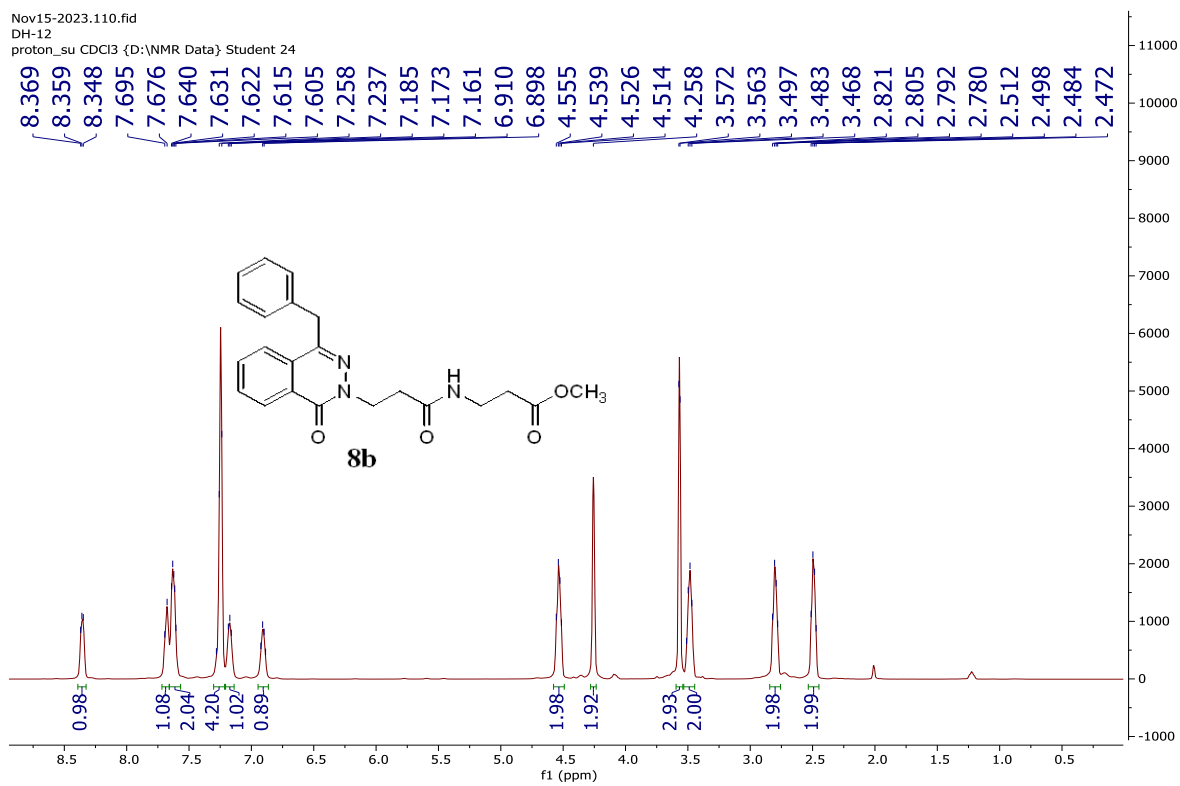

Figure S38 The <sup>1</sup>H-NMR spectrum of compound **8b**

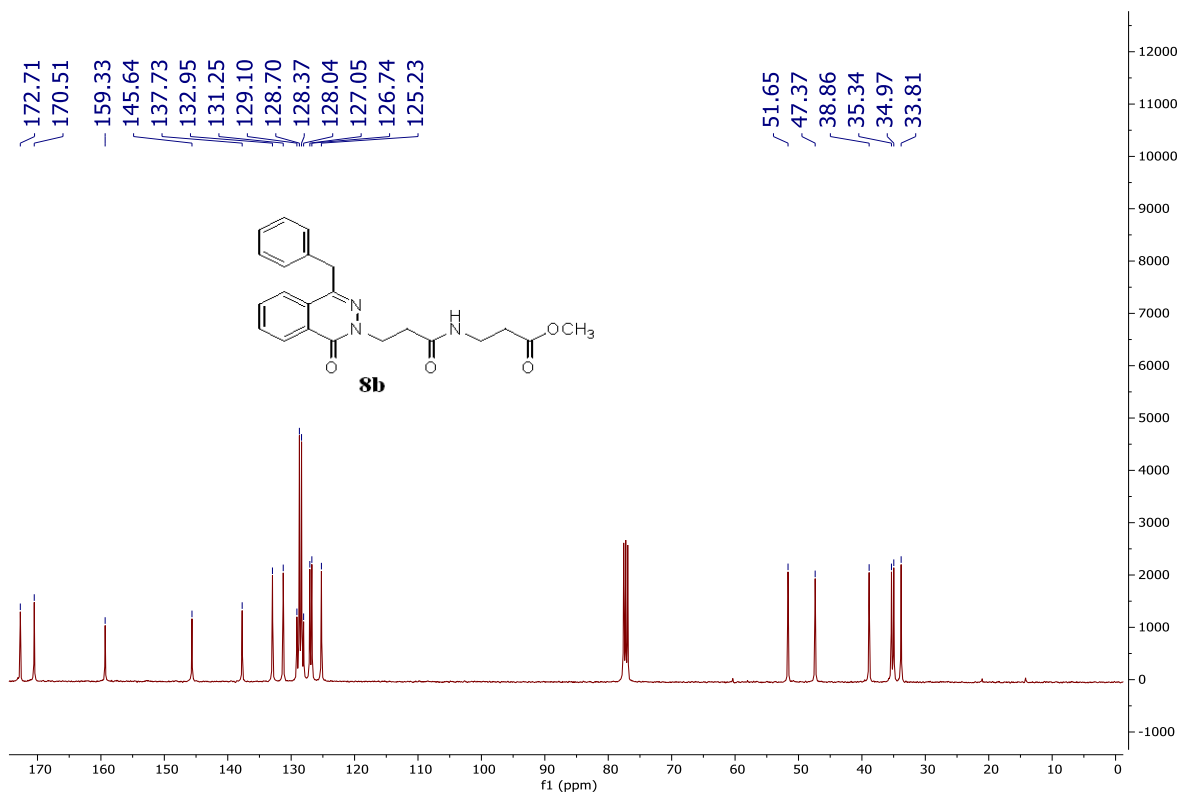

Figure S39 The <sup>13</sup>C-NMR spectrum of compound **8b**

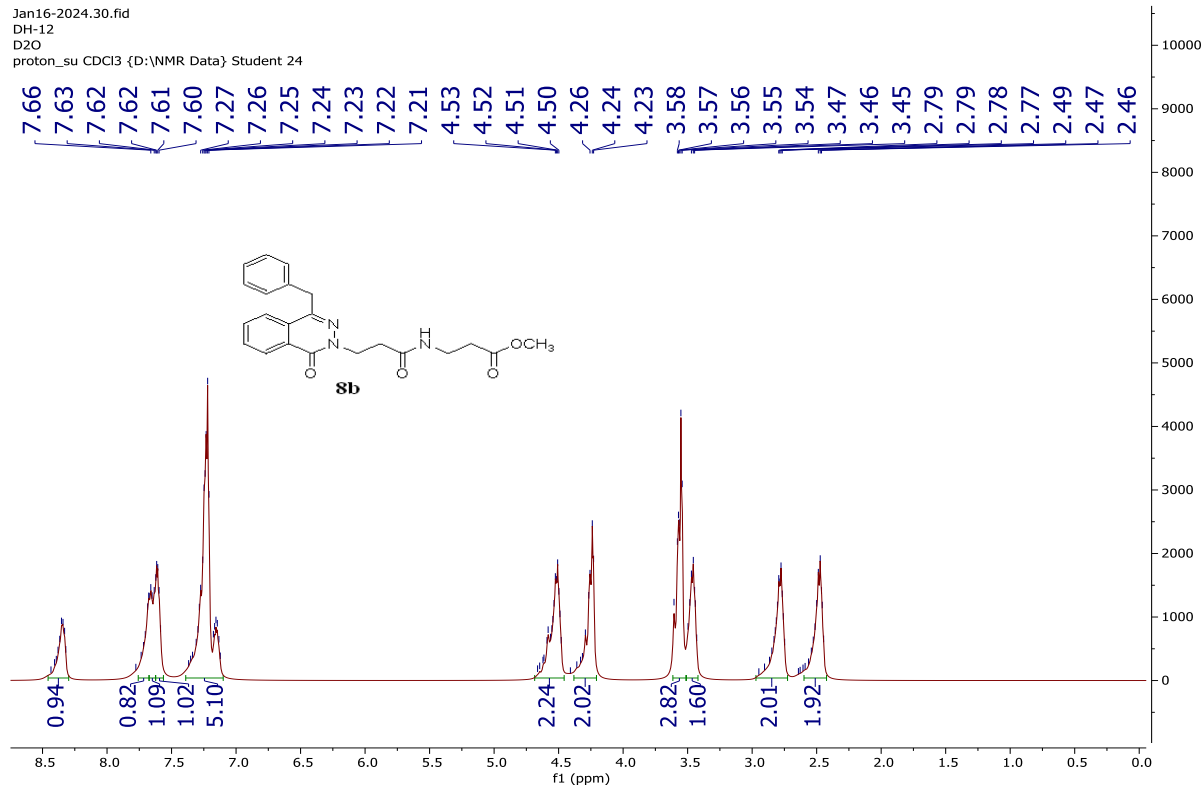

Figure S40 The D<sub>2</sub>O spectrum of compound **8b**

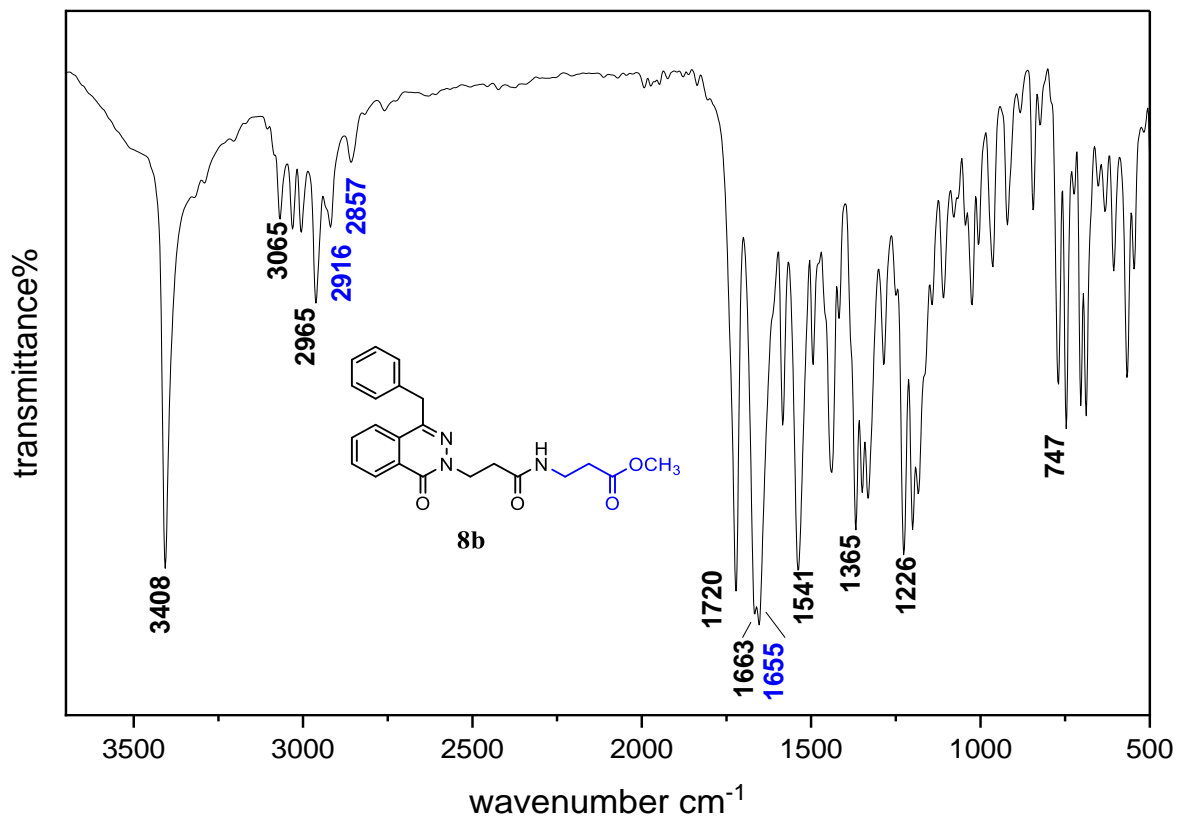

**Figure S41** The IR spectrum of compound **8b**

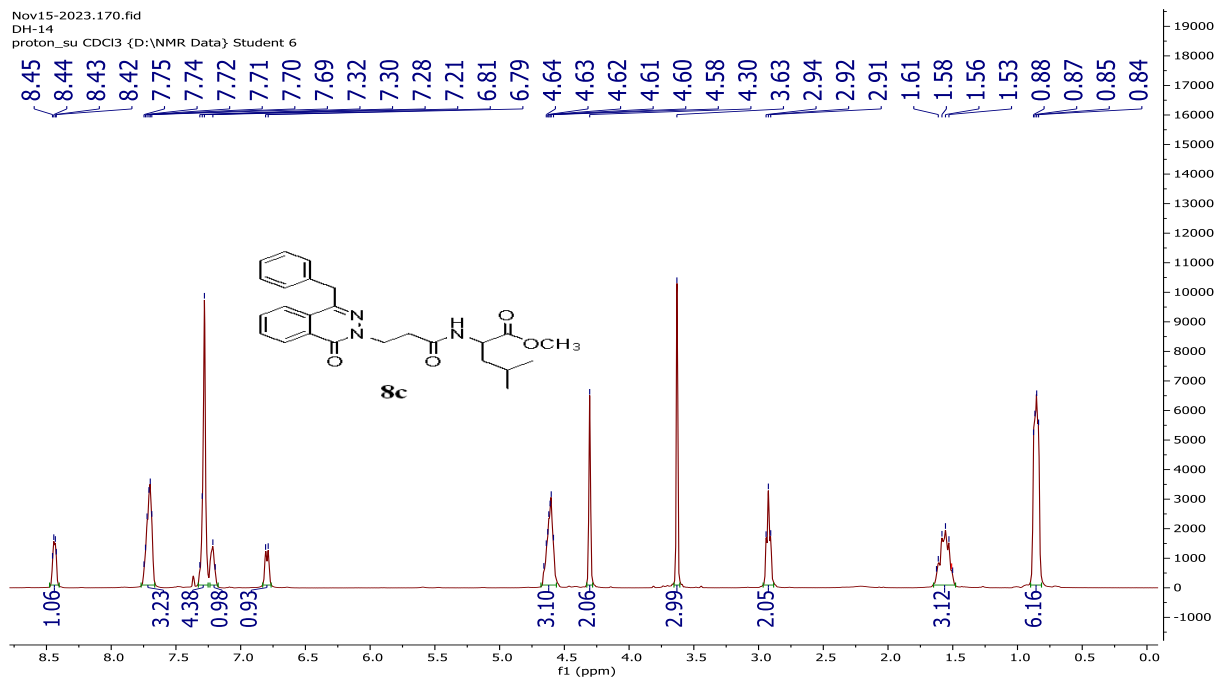

**Figure S42** The  $^1\text{H-NMR}$  spectrum of compound **8c**



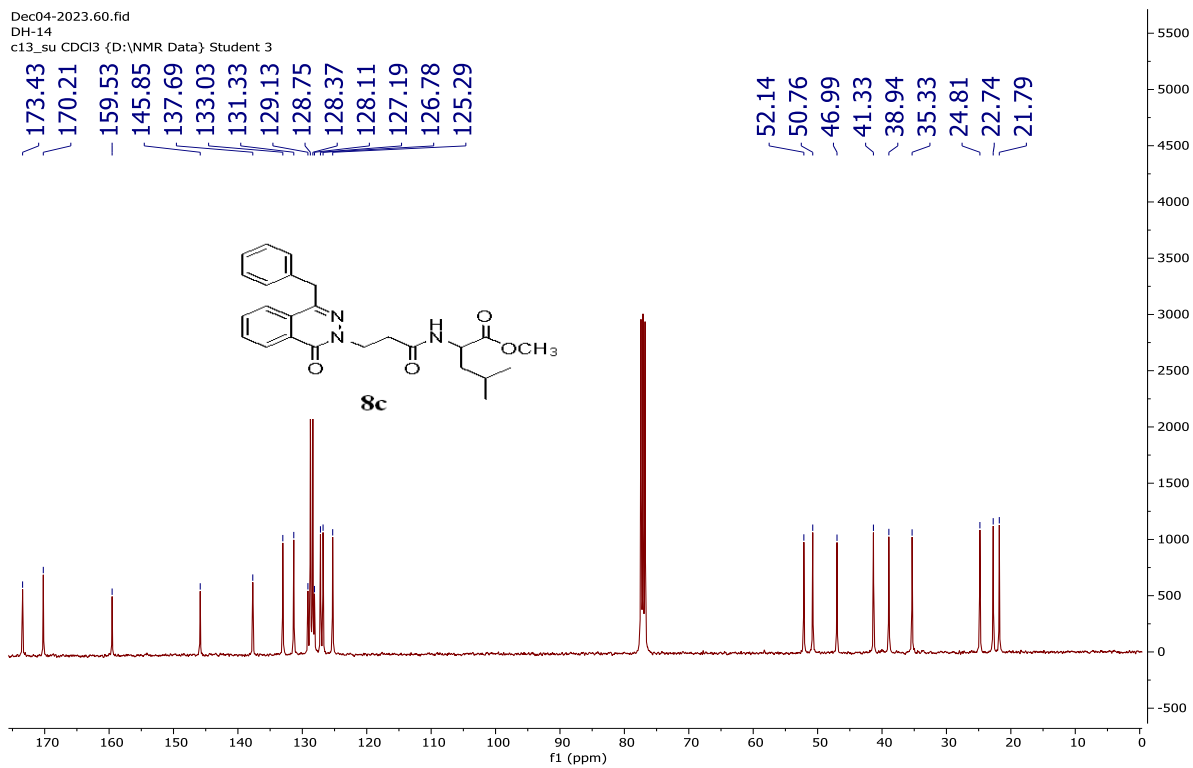

**Figure S43** The <sup>13</sup>C-NMR spectrum of compound **8c**

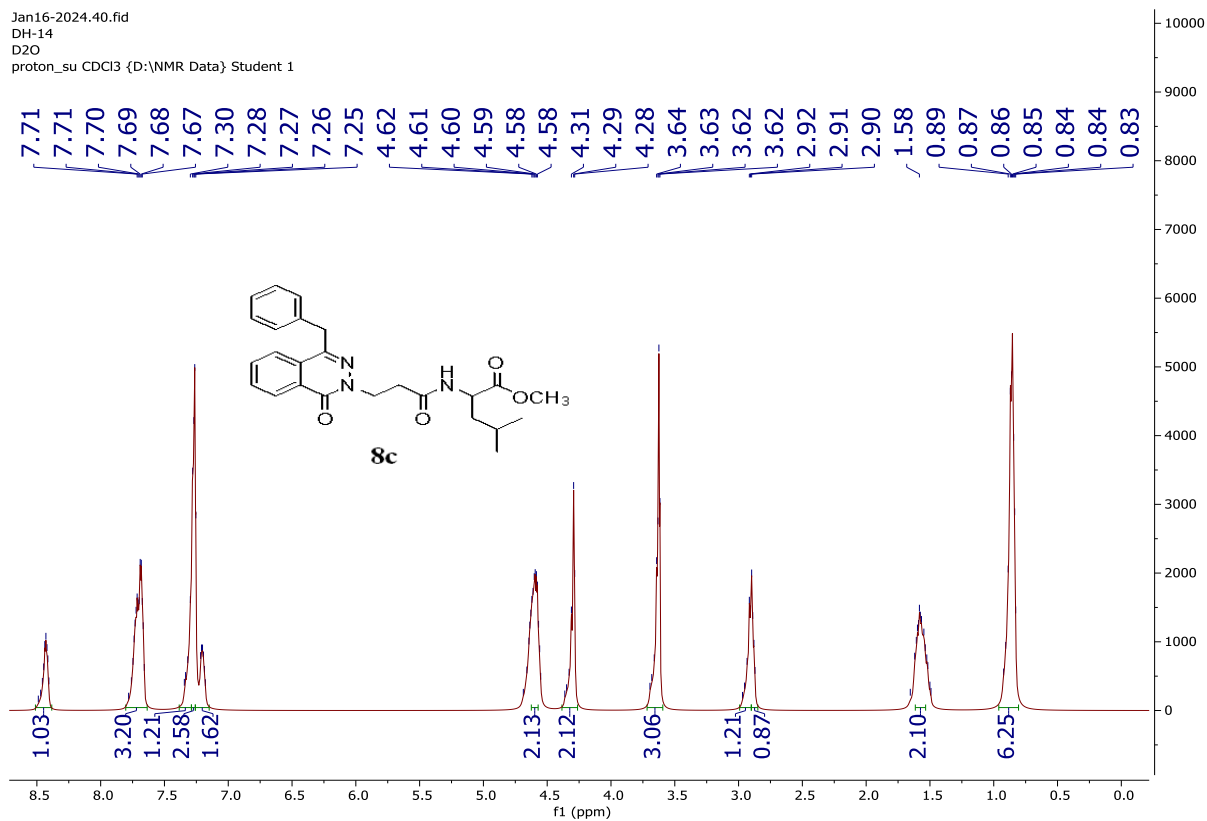

**Figure S44** The D<sub>2</sub>O spectrum of compound **8c**

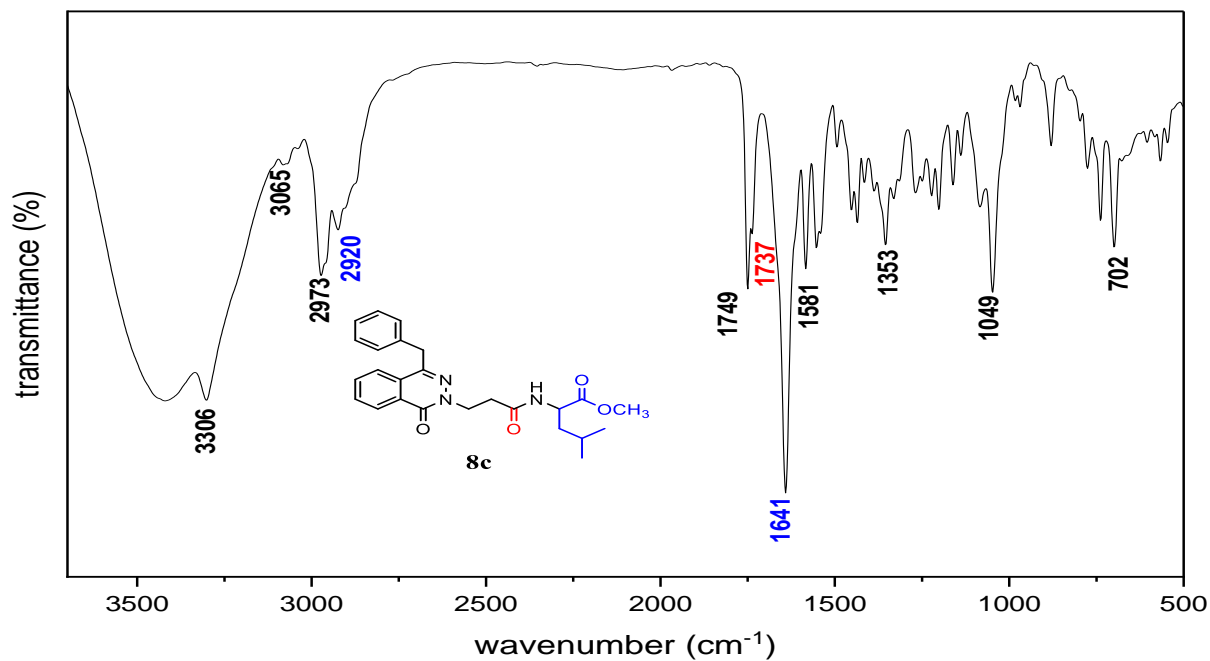

Figure S45 The IR spectrum of compound **8c**

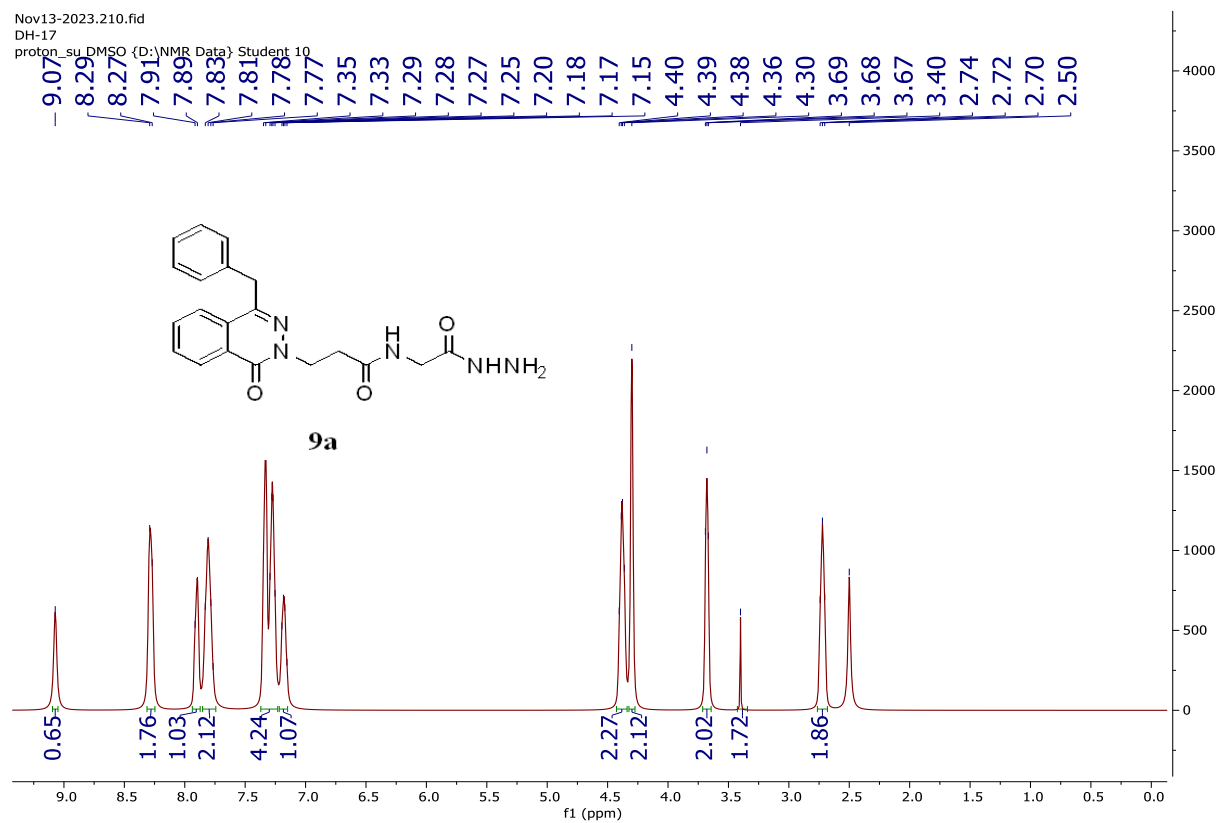

Figure S46 The <sup>1</sup>H-NMR spectrum of compound **9a**

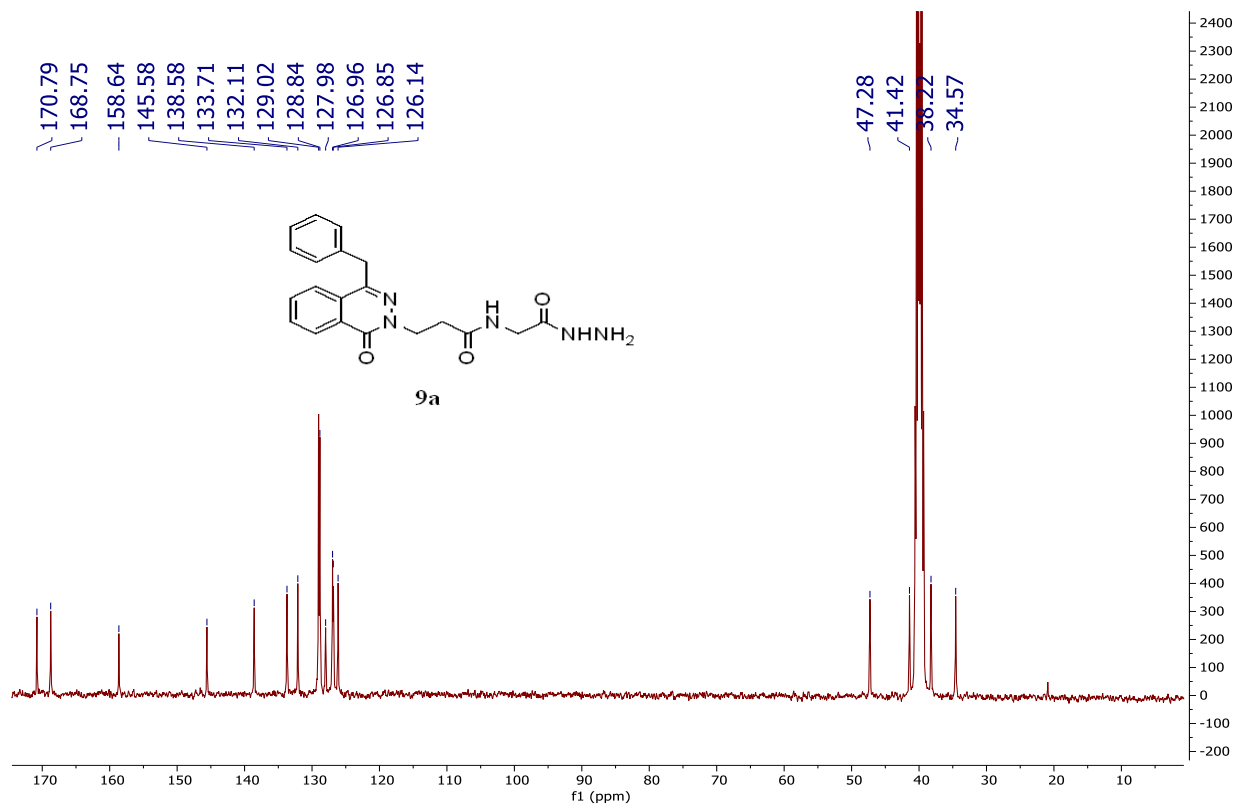

Figure S47 The  $^{13}\text{C-NMR}$  spectrum of compound 9a

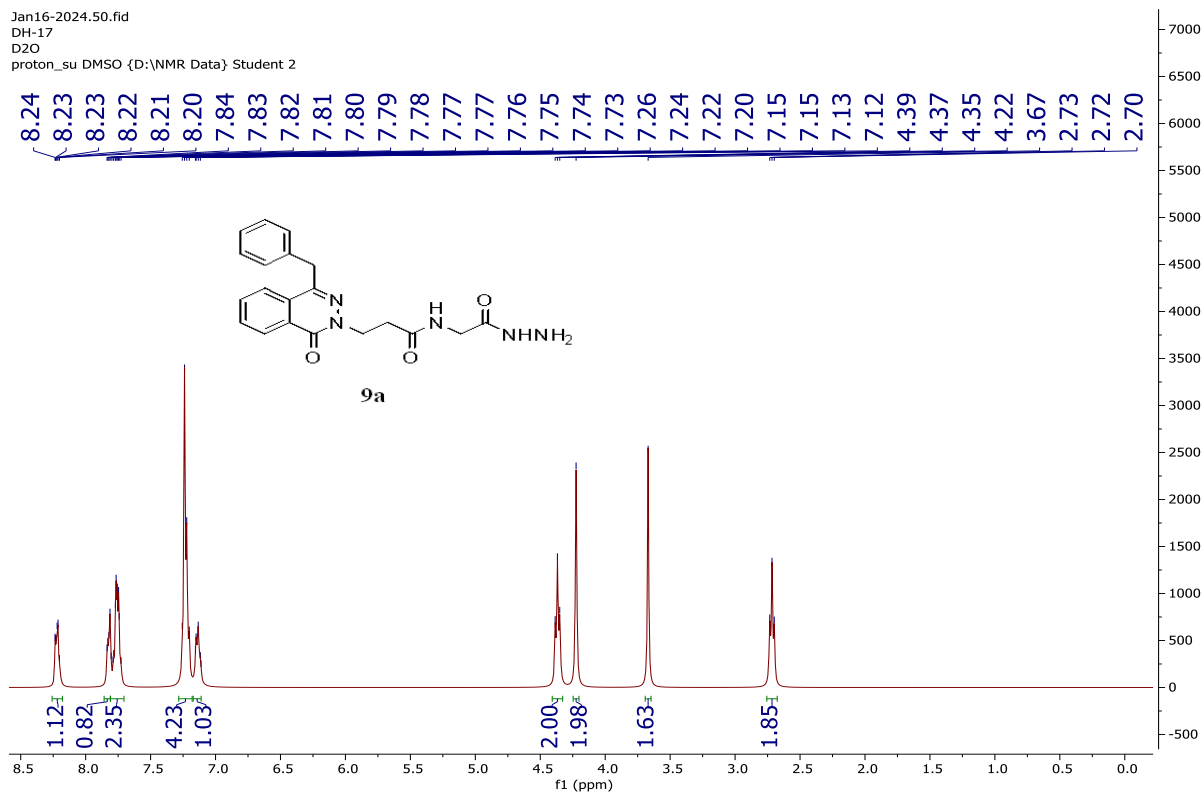

Figure S48 The D2O spectrum of compound 9a

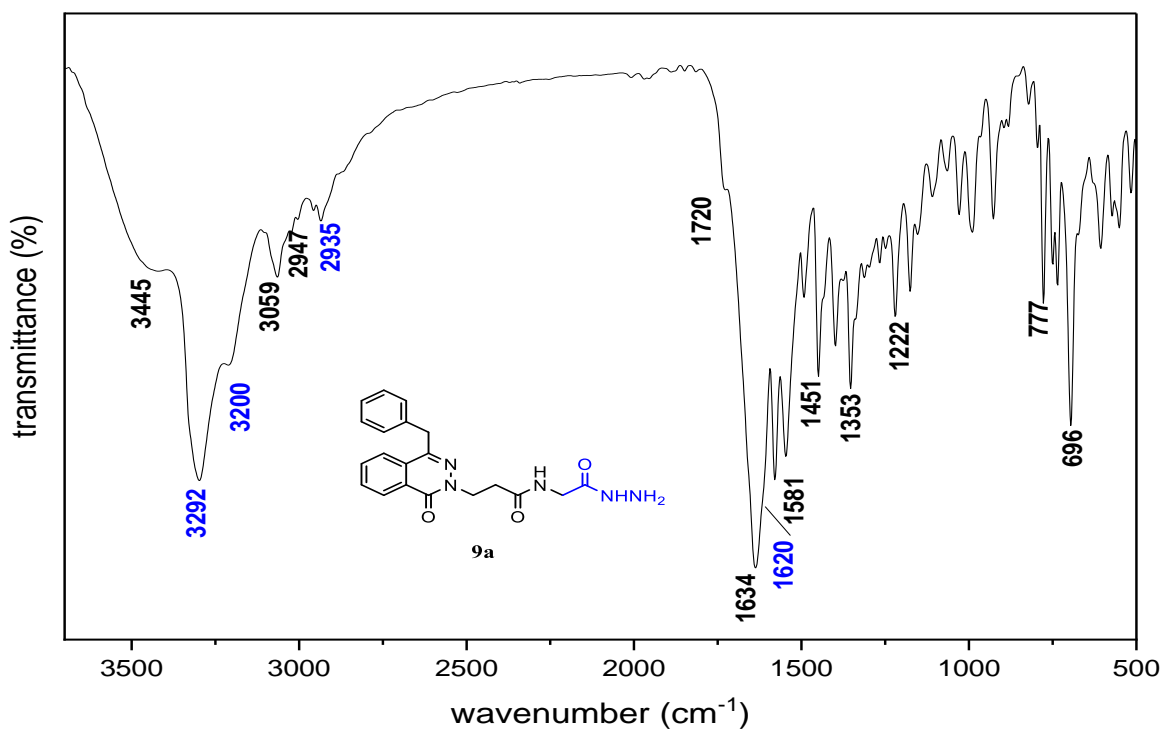

**Figure S49** The IR spectrum of compound **9a**

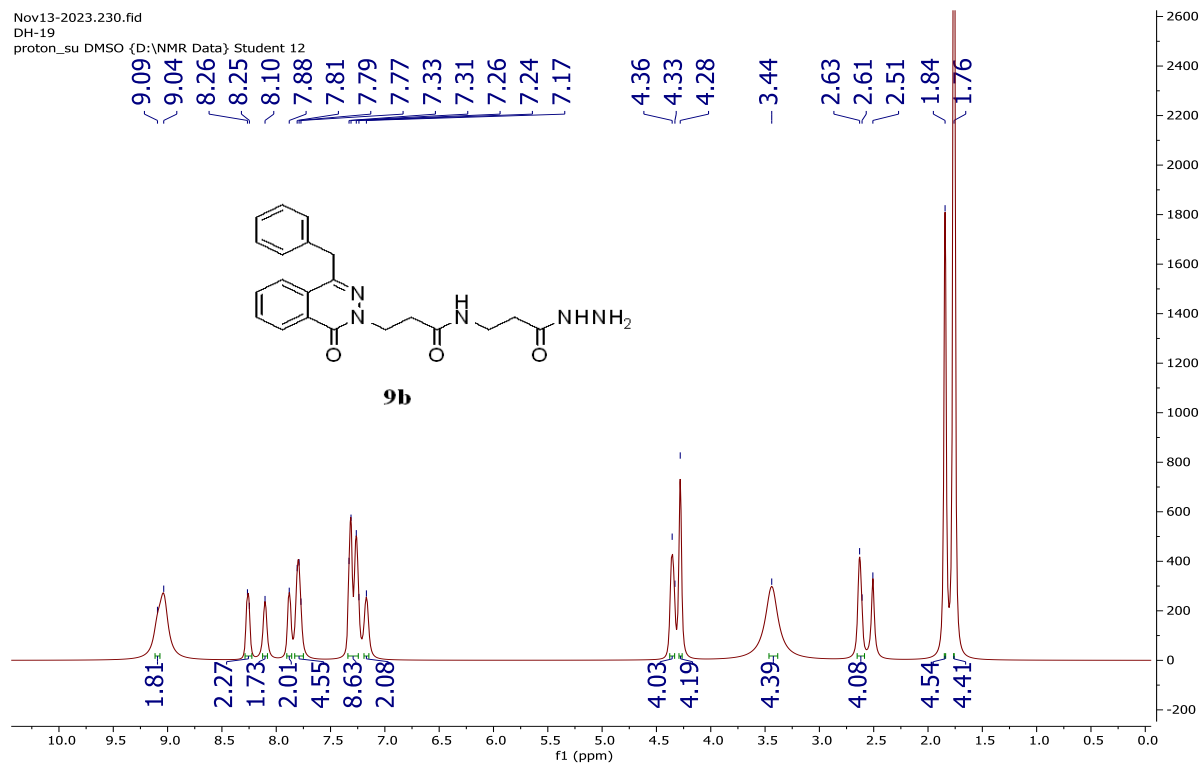

**Figure S50** The <sup>1</sup>H-NMR spectrum of compound **9b**

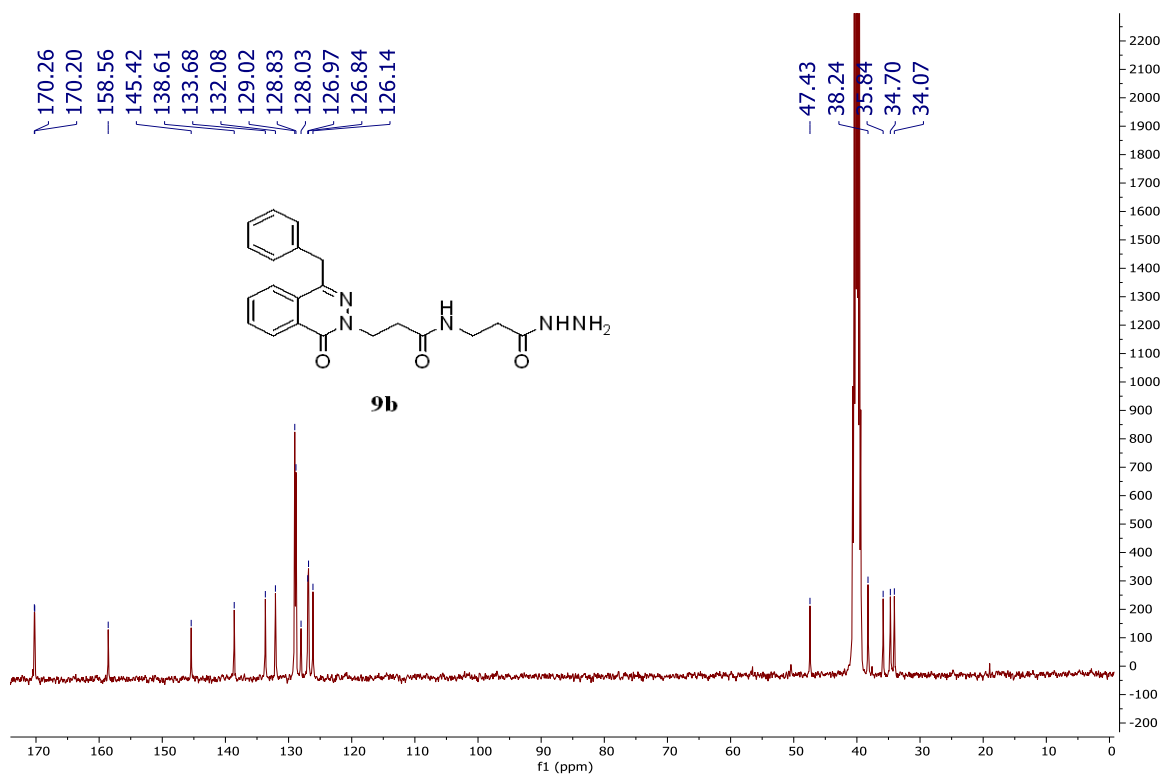

Figure S51 The <sup>13</sup>C-NMR spectrum of compound **9b**

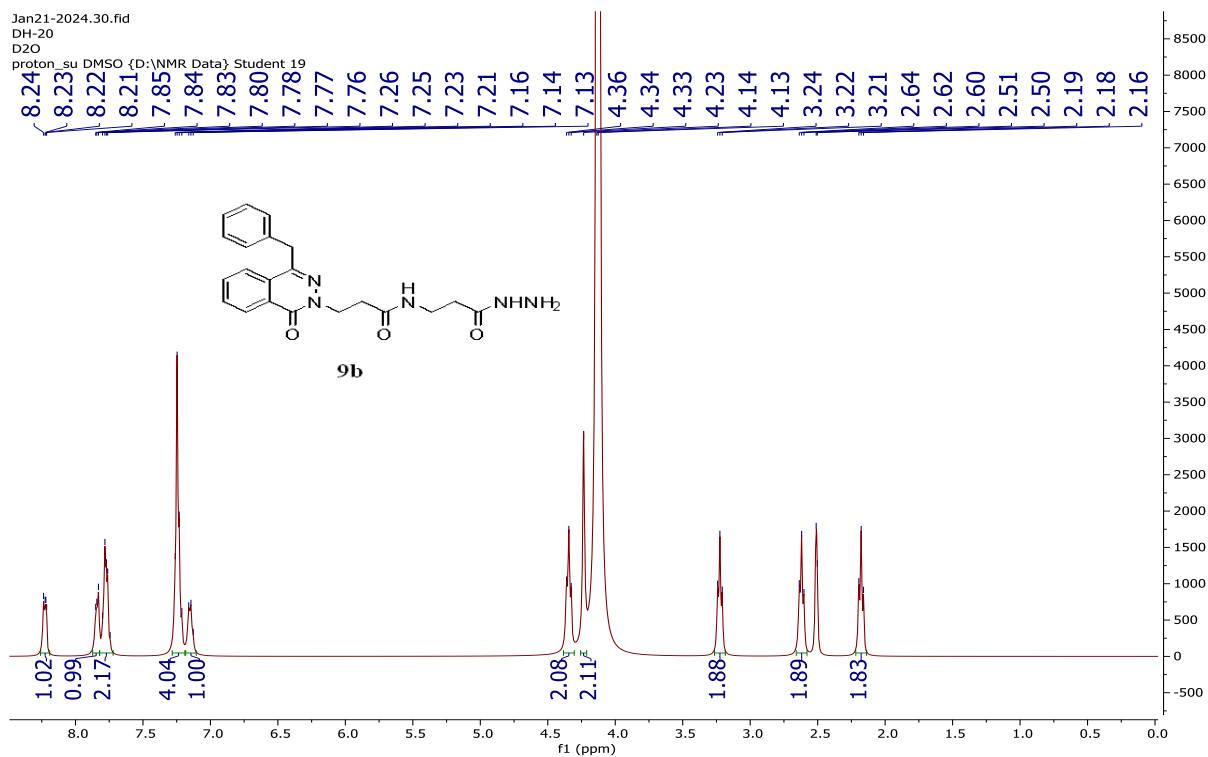

Figure S52 The D<sub>2</sub>O spectrum of compound **9b**

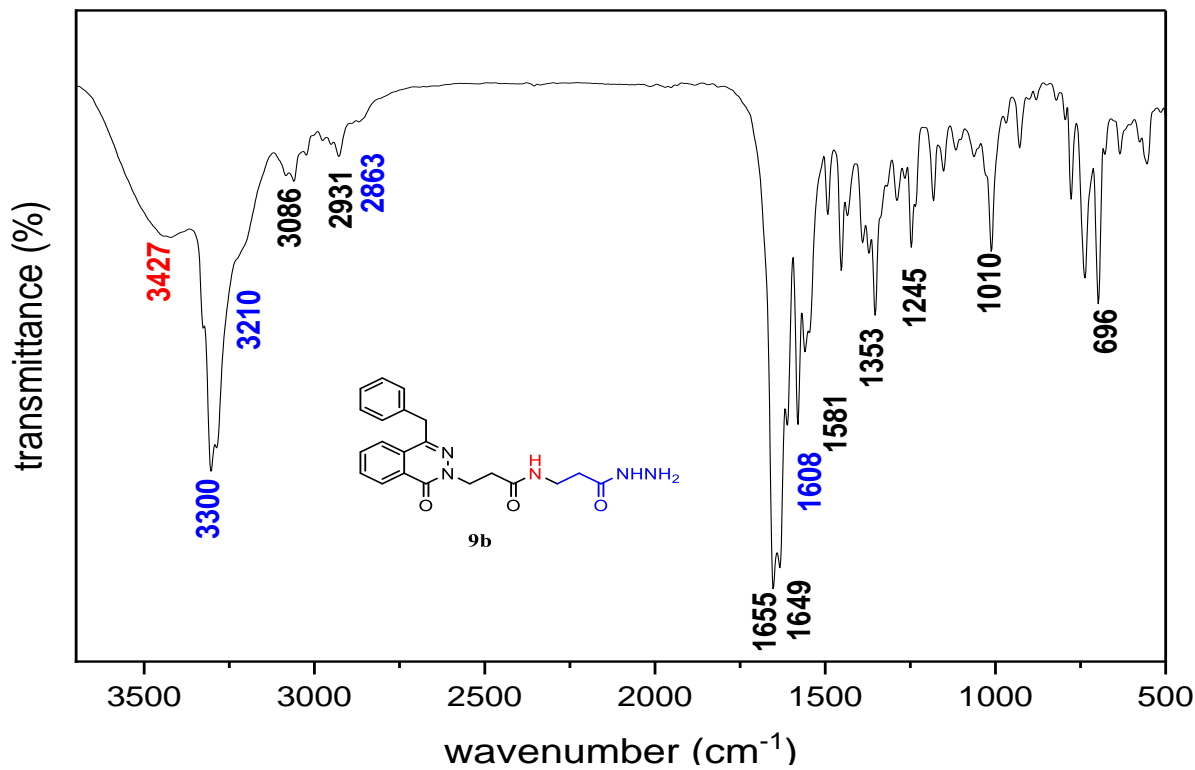

Figure S53 The IR spectrum of compound **9b**

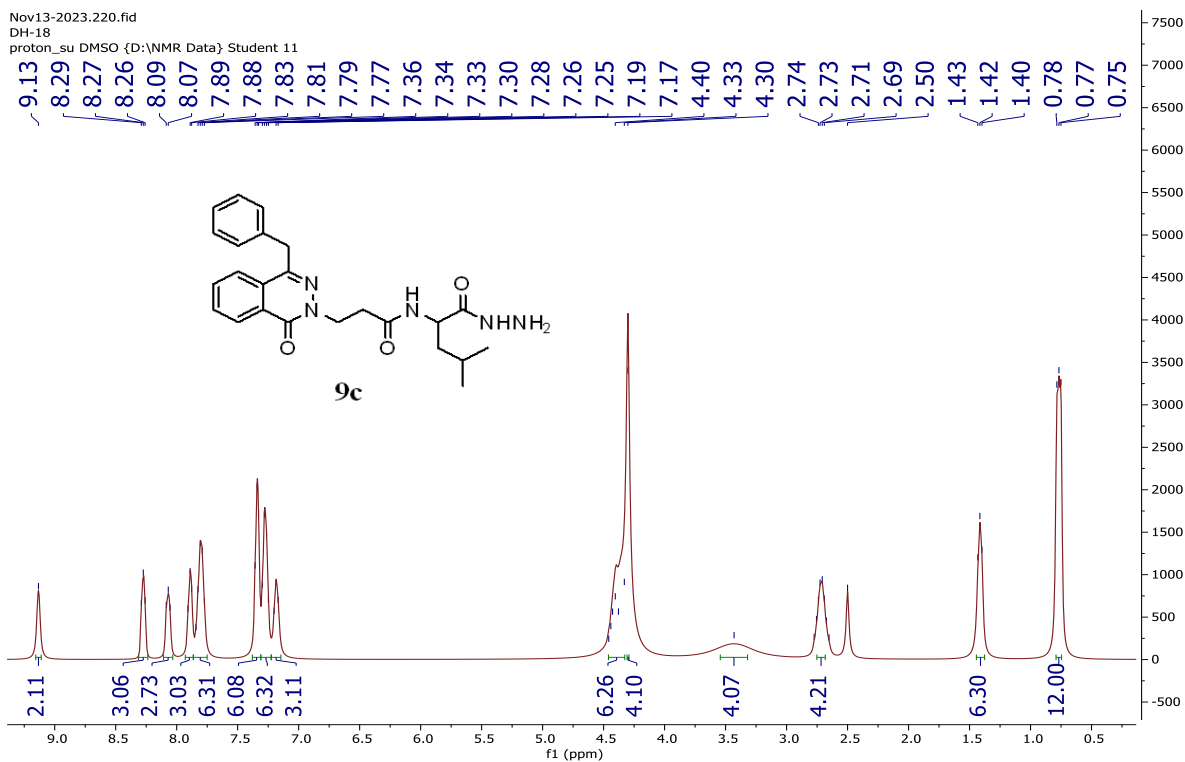

Figure S54 The  $^1\text{H-NMR}$  spectrum of compound **9c**

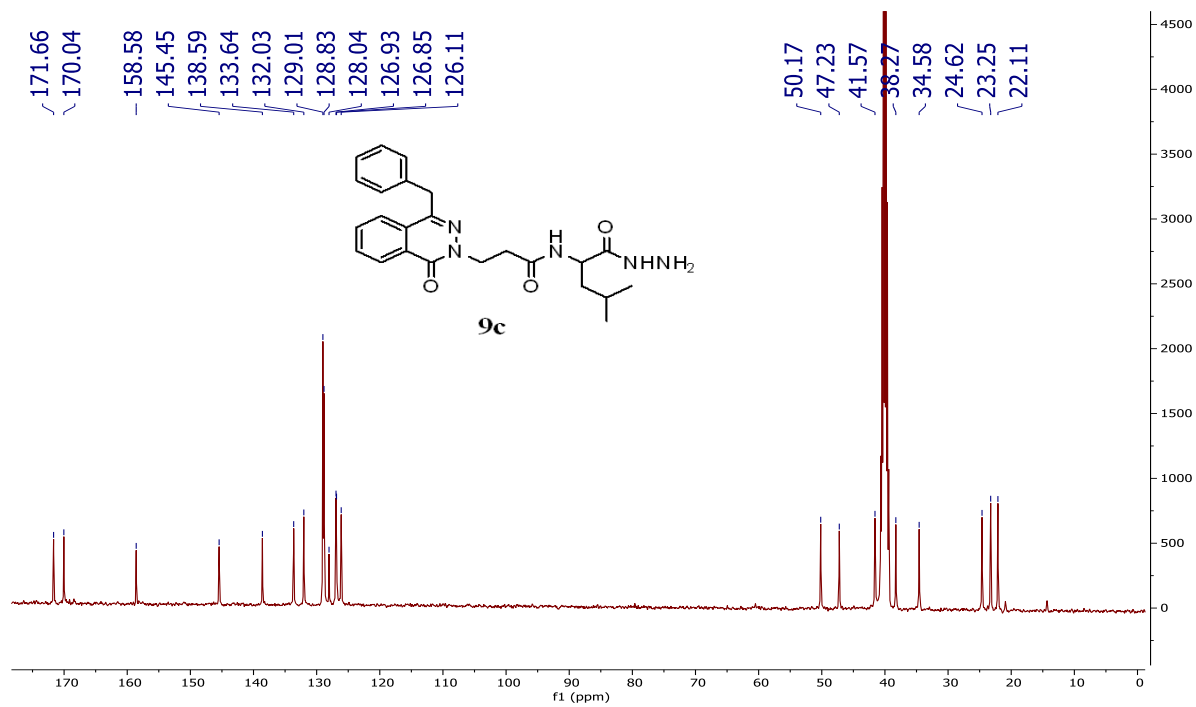

**Figure S55** The <sup>13</sup>C-NMR spectrum of compound **9c**

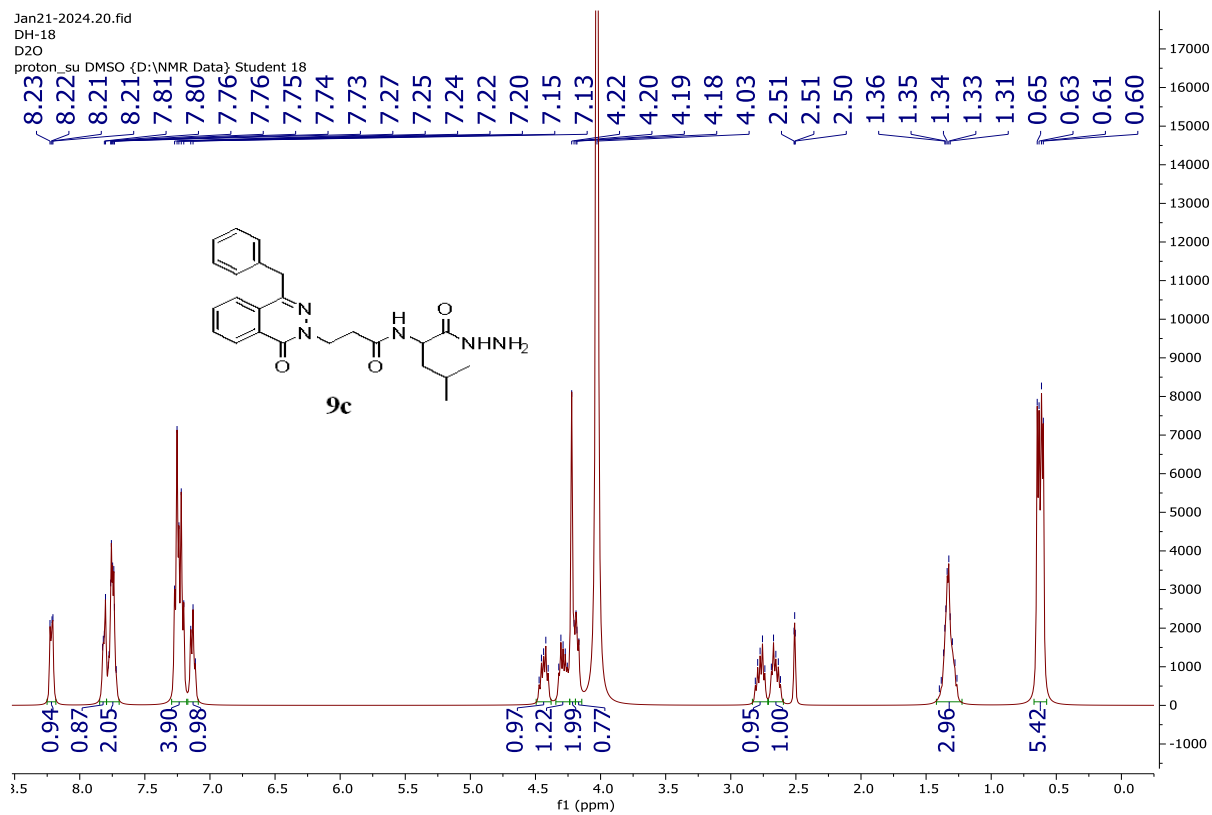

**Figure S56** The D<sub>2</sub>O spectrum of compound **9c**

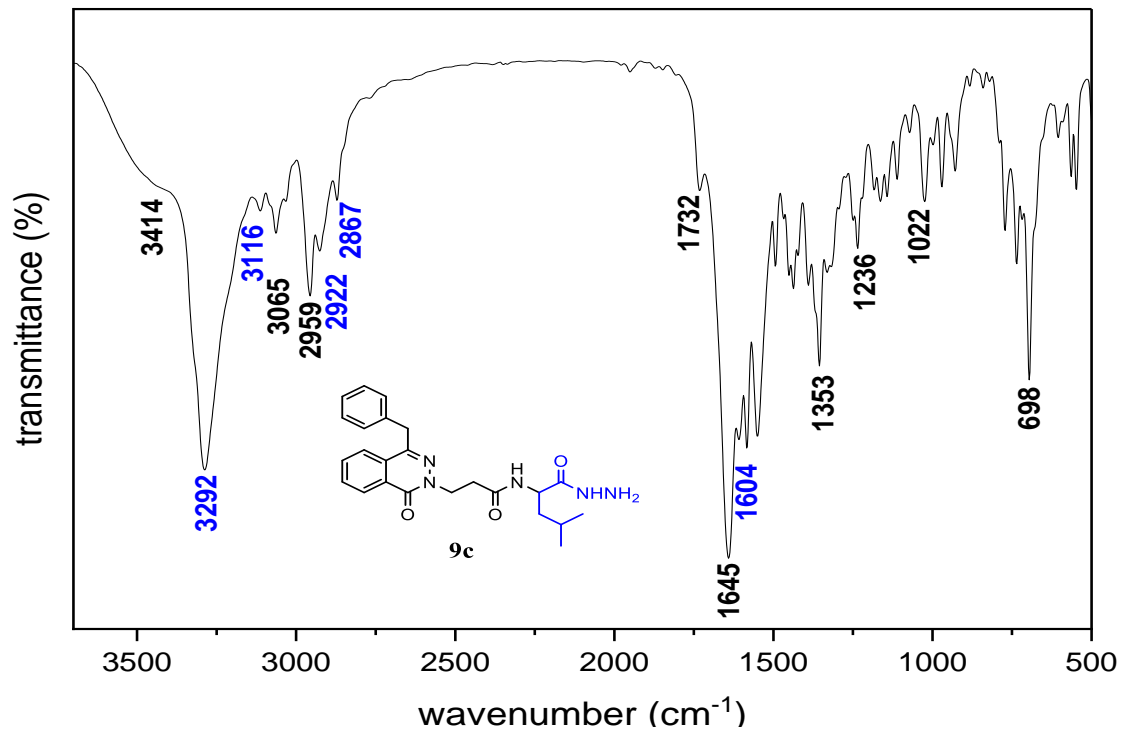

Figure S57: The IR spectrum of compound 9c

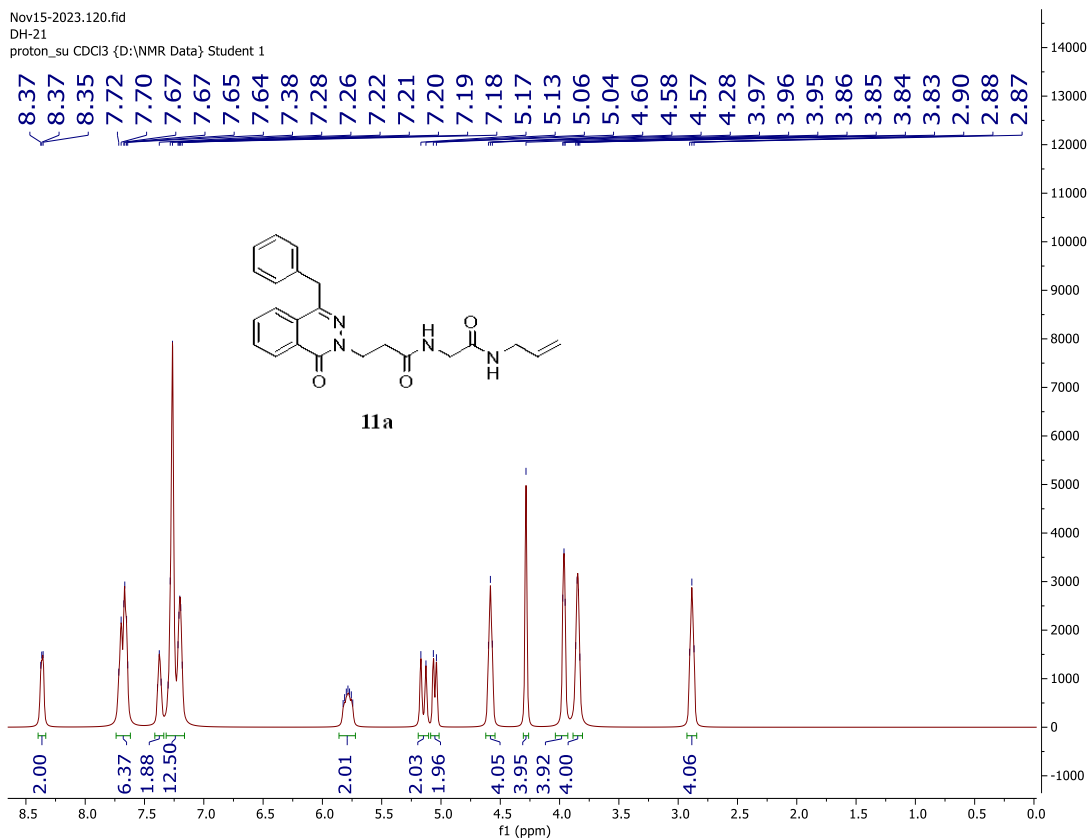

Figure S58: The <sup>1</sup>H-NMR spectrum of compound 11a



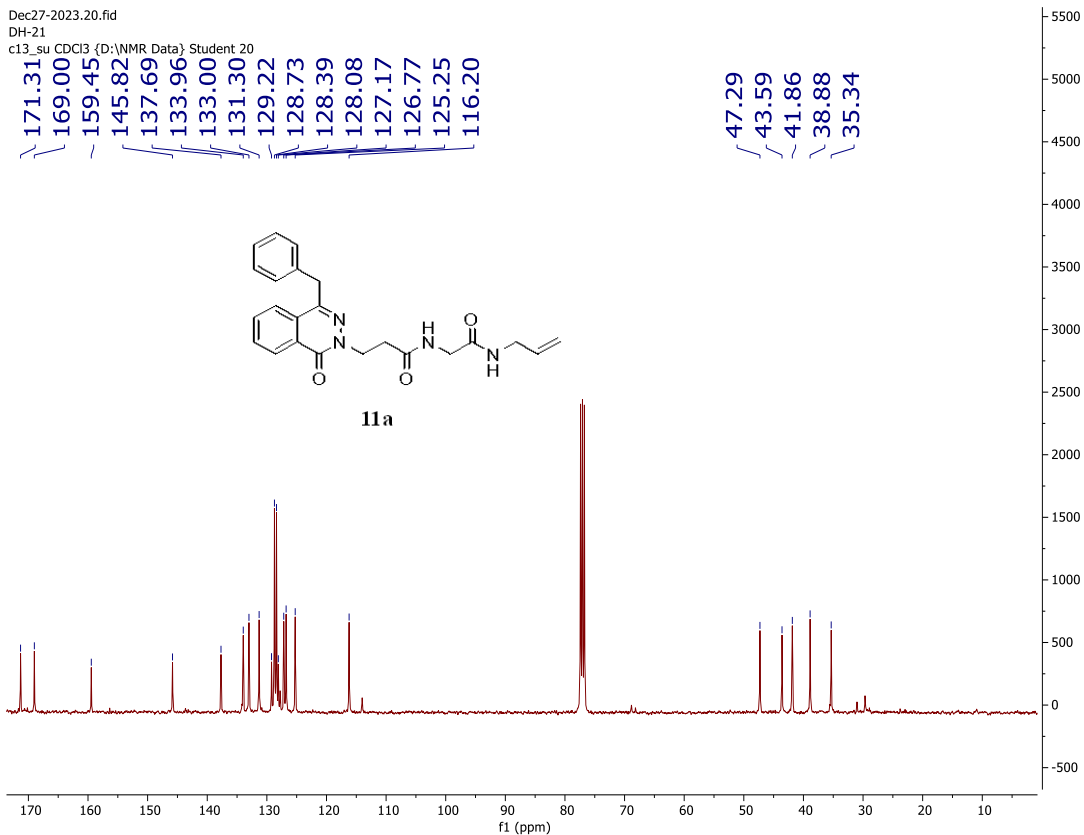

Figure S59: The  $^{13}\text{C}$ -NMR spectrum of compound 11a

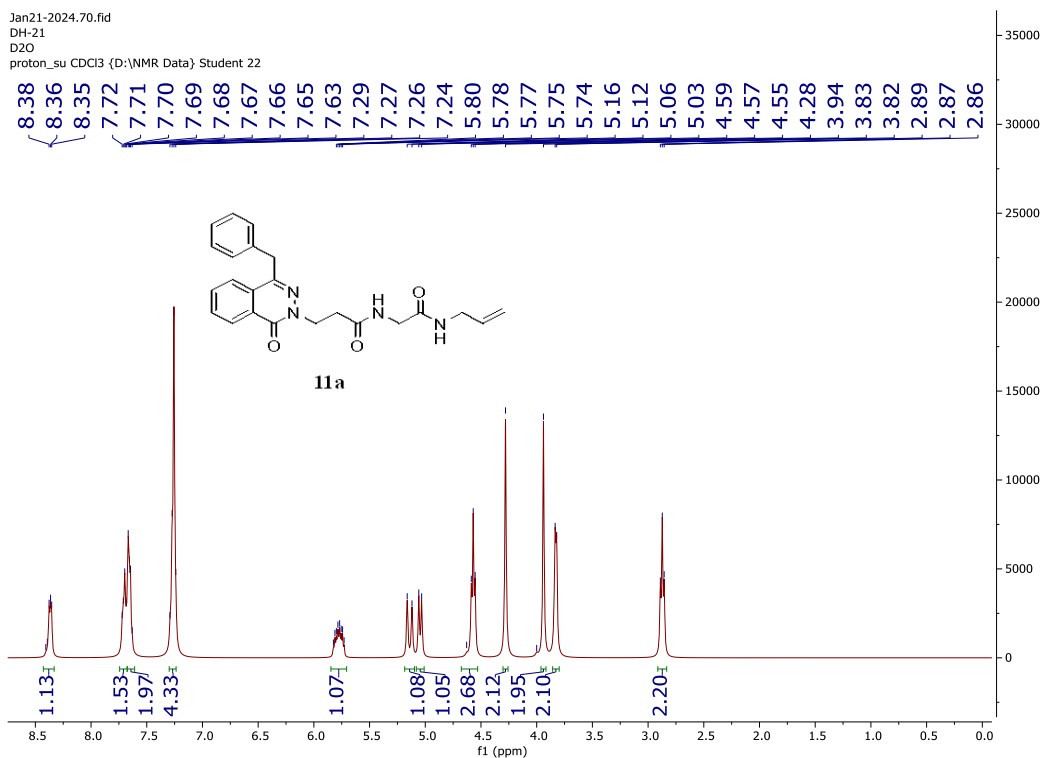

Figure S60: The D2O spectrum of compound 11a

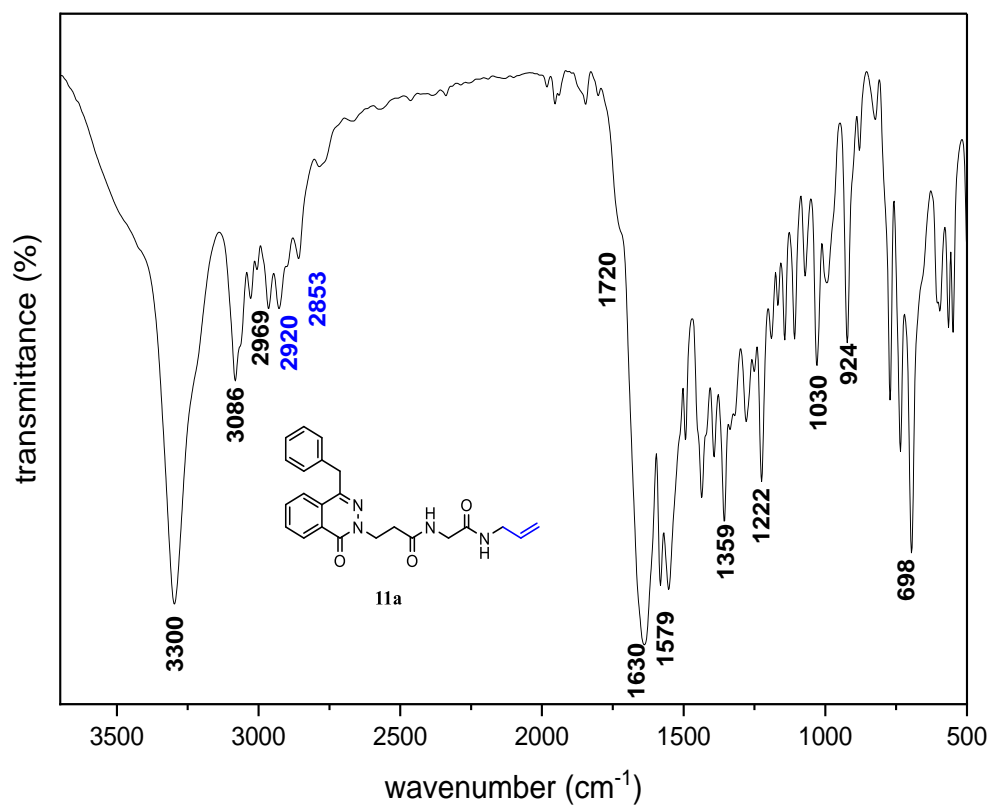

**Figure S61:** The IR spectrum of compound **11a**

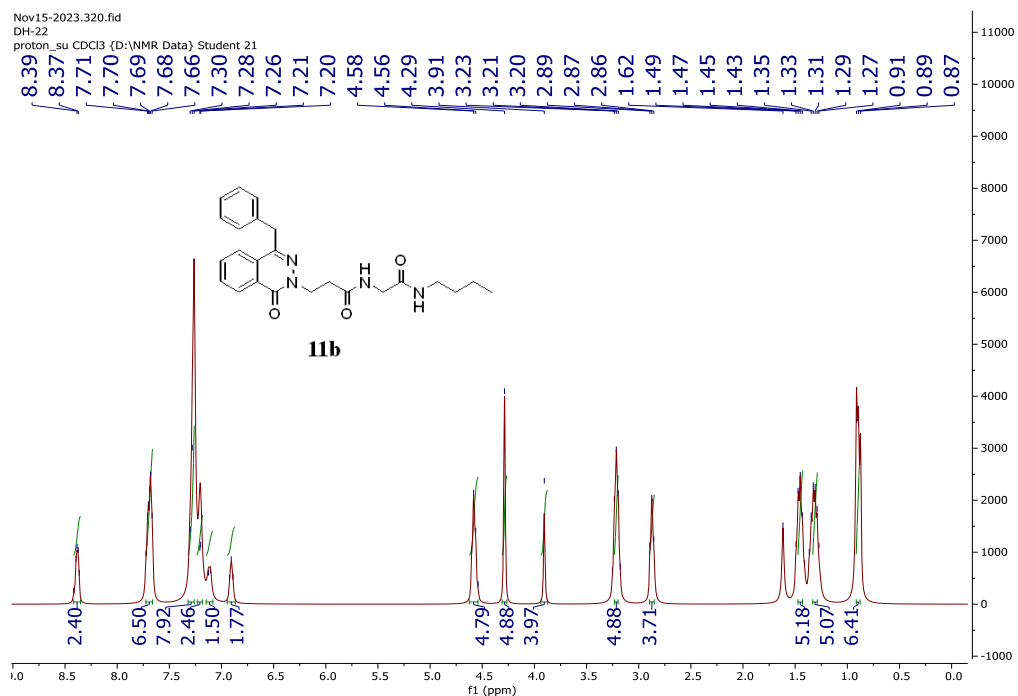

**Figure 62:** The <sup>1</sup>H-NMR spectrum of compound **11b**

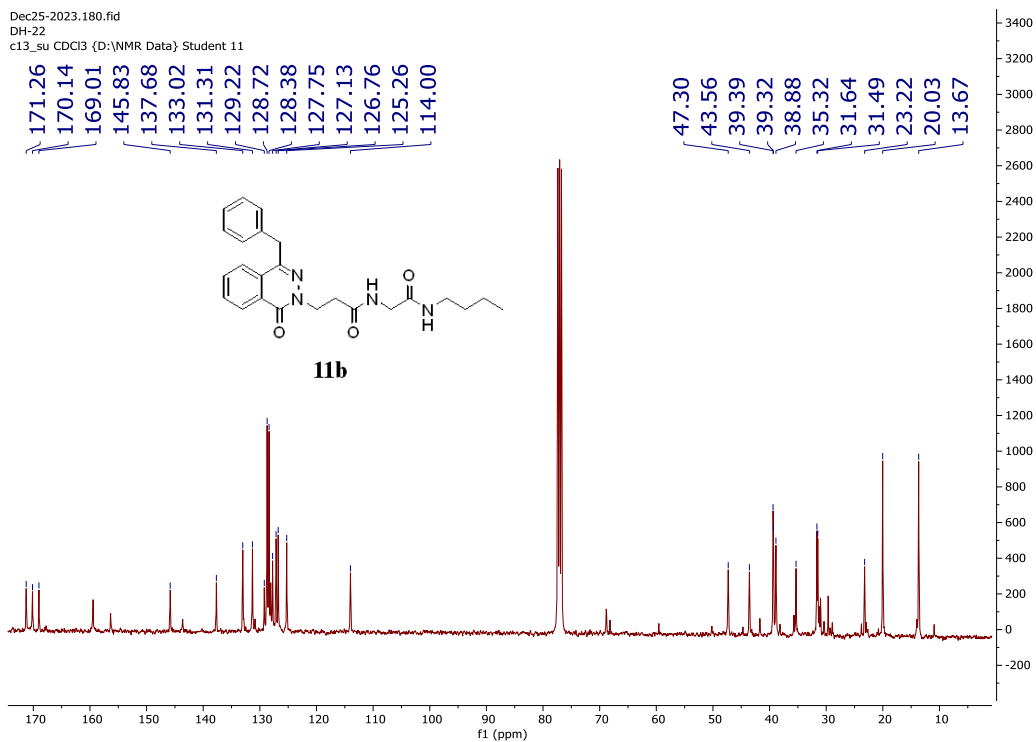

**Figure 63:** The  $^{13}\text{C}$ -NMR spectrum of compound **11b**

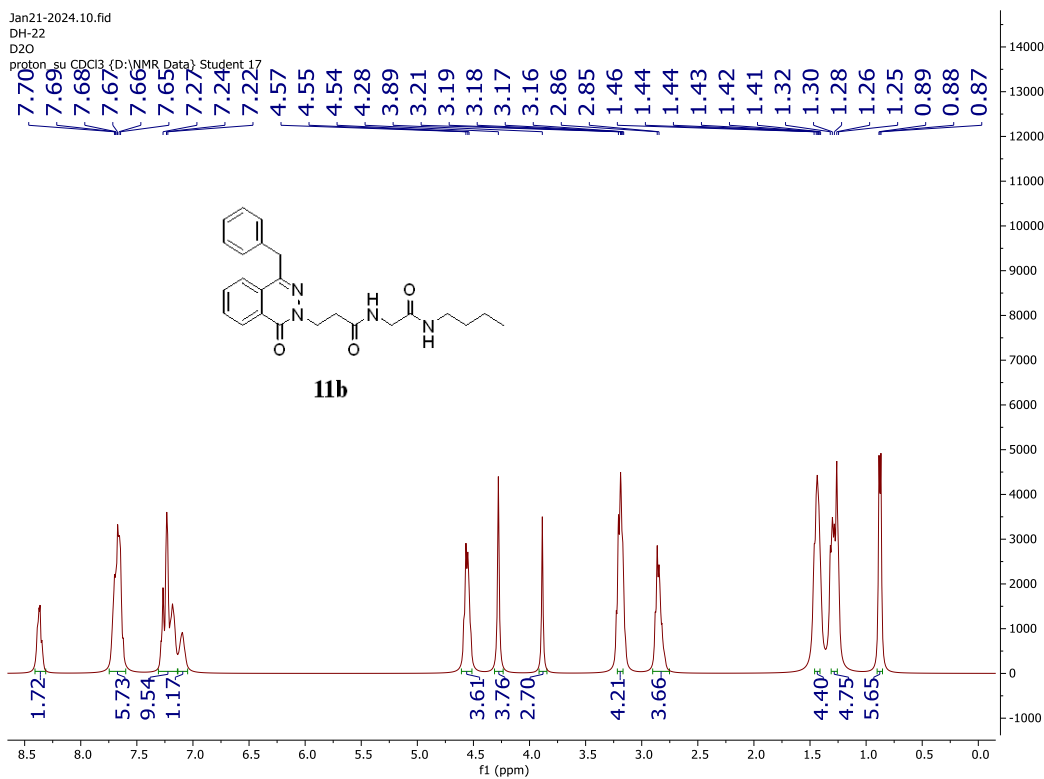

**Figure S64:** The D<sub>2</sub>O spectrum of compound **11b**

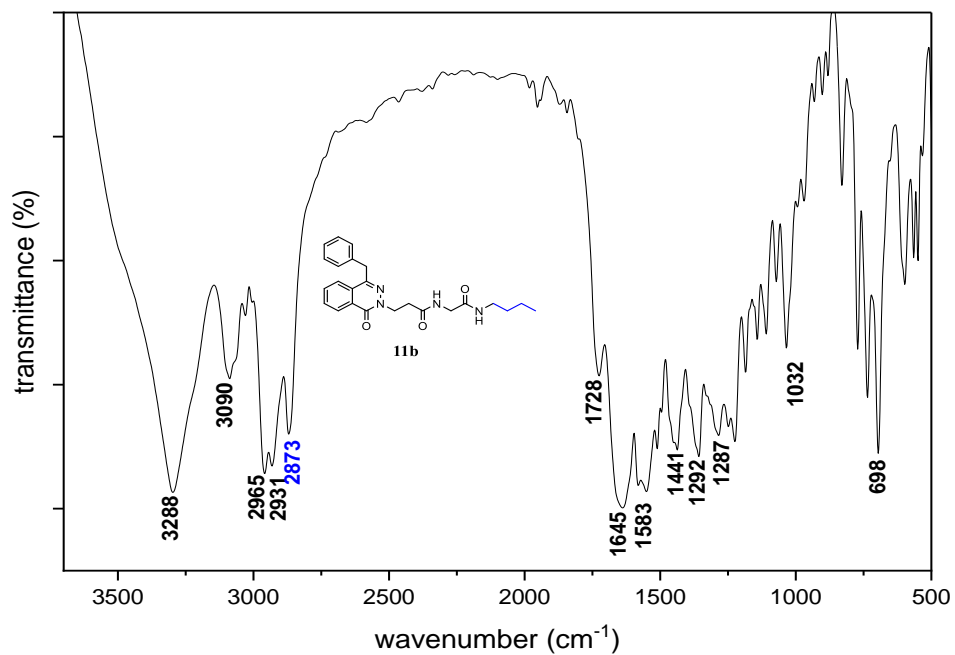

**Figure S65:** The IR spectrum of compound **11b**

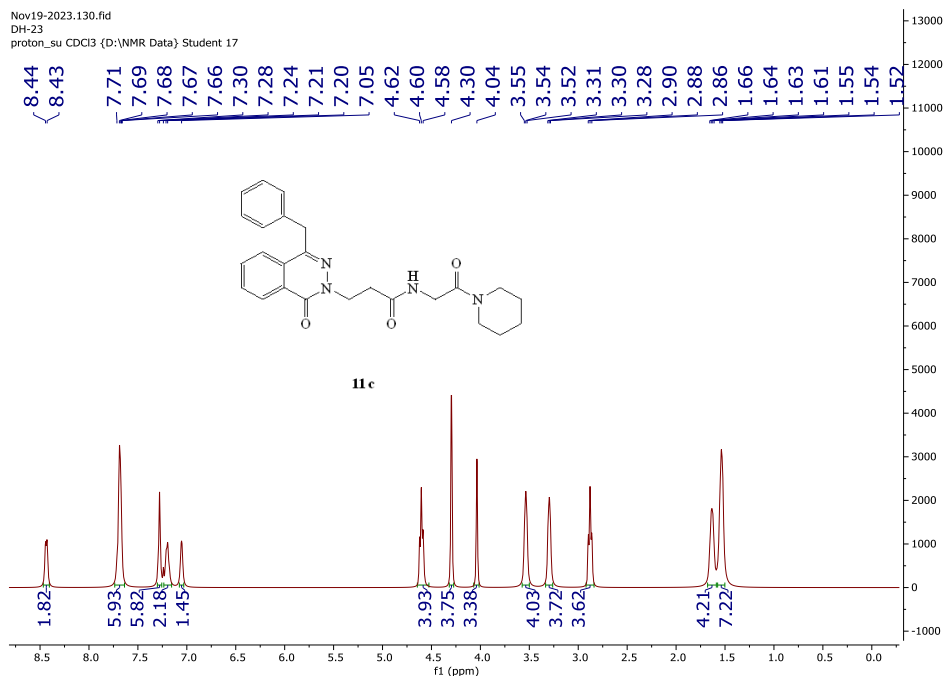

**Figure S66:** The  $^1\text{H}$ -NMR spectrum of compound **11c**

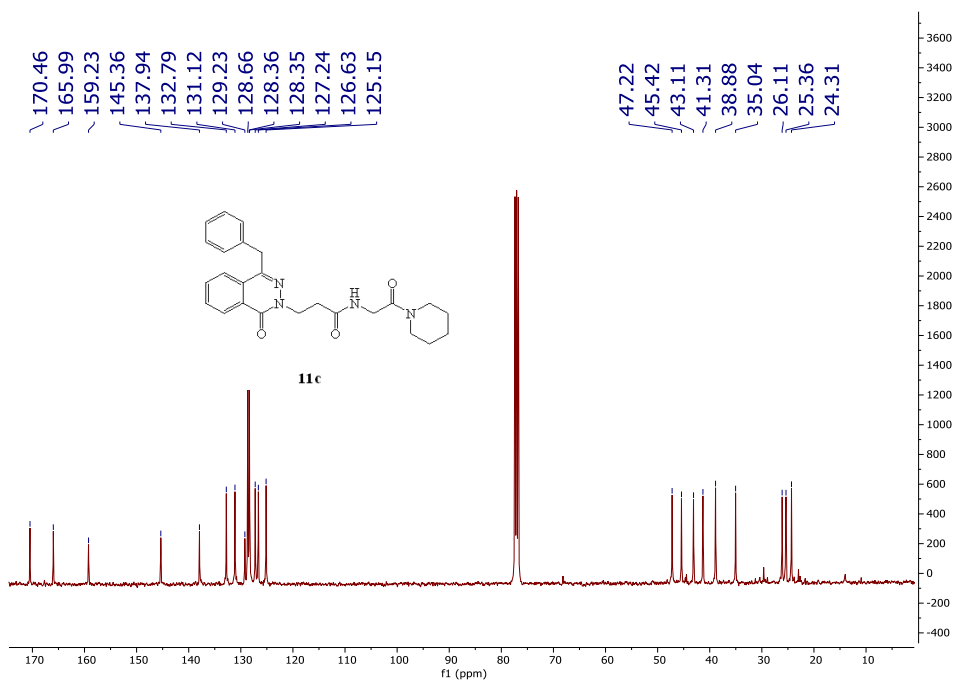

**Figure S67:** The  $^{13}\text{C}$ -NMR spectrum of compound **11c**

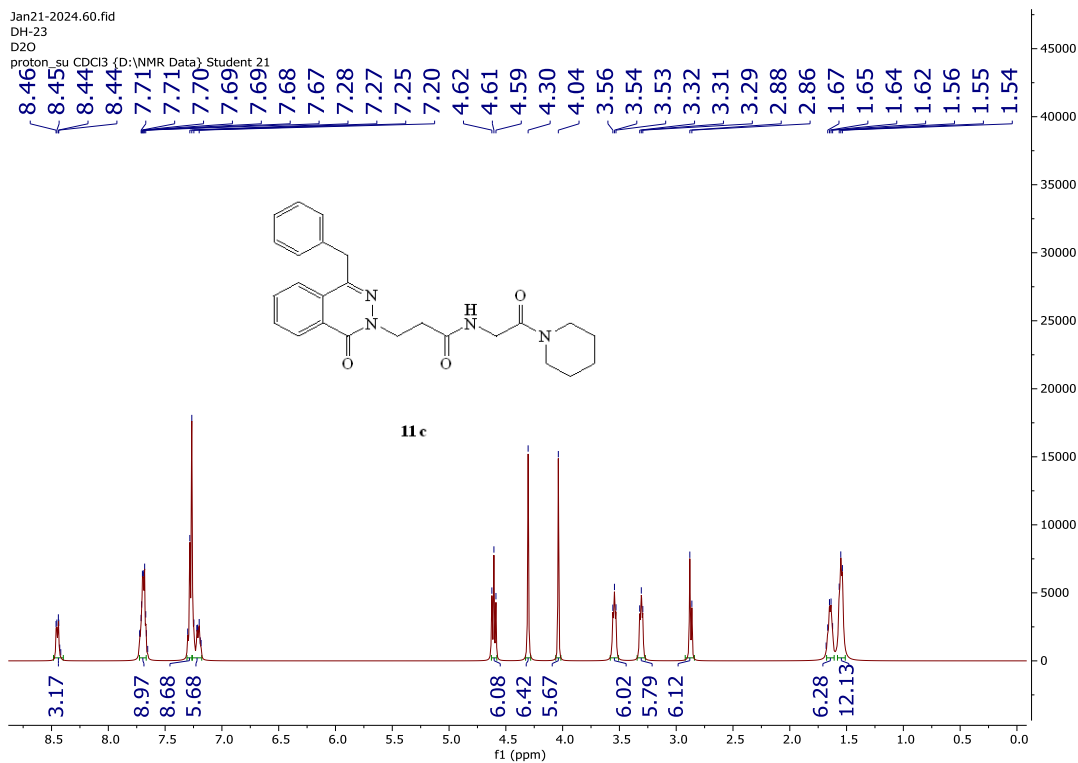

**Figure S68:** The D2O spectrum of compound **11c**

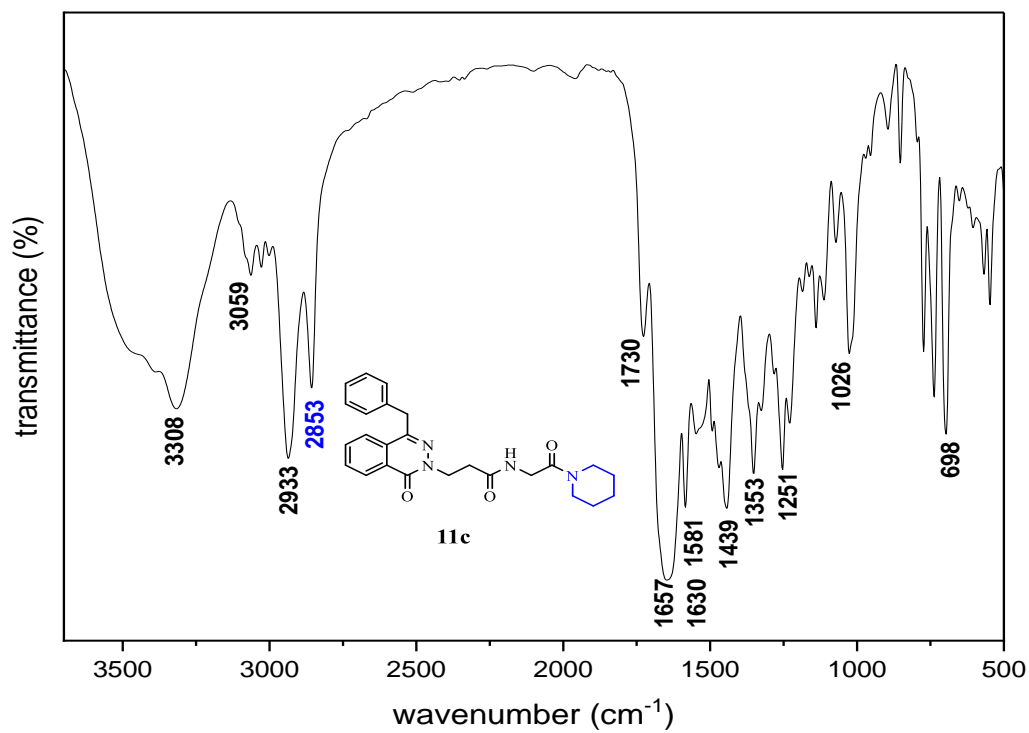

**Figure S69:** The IR spectrum of compound **11c**

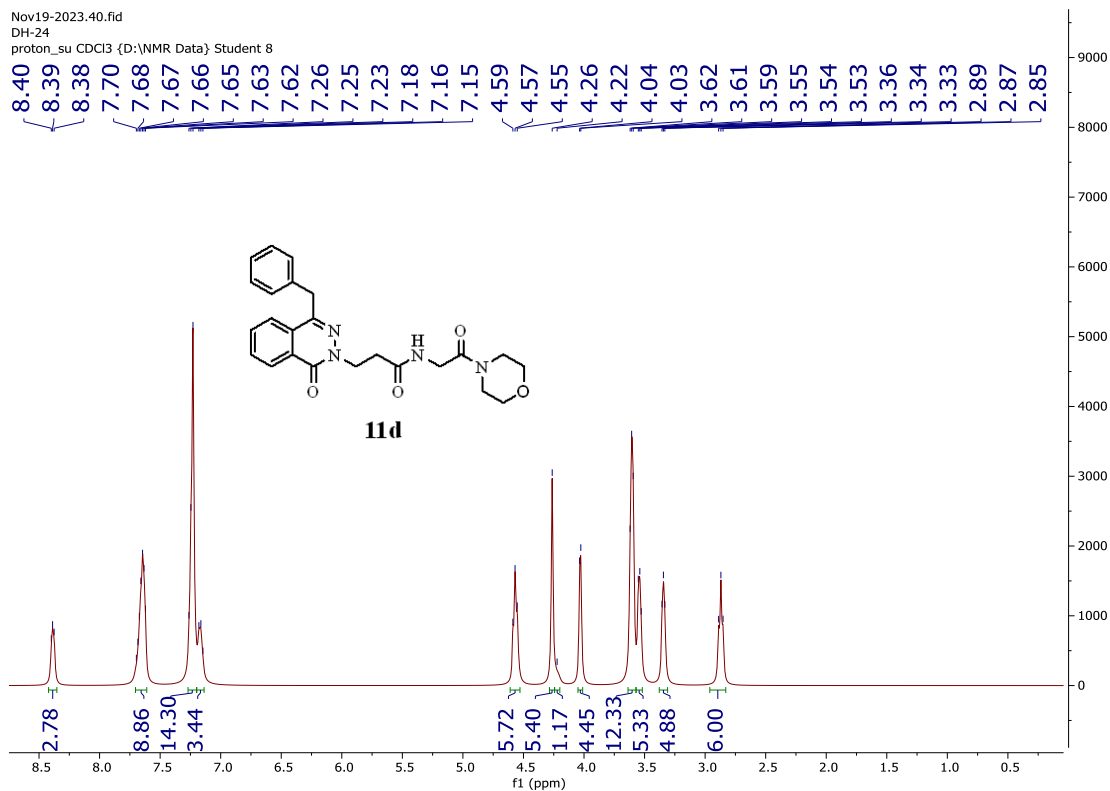

Figure S70 : The  $^1\text{H}$ -NMR spectrum of compound **11d**

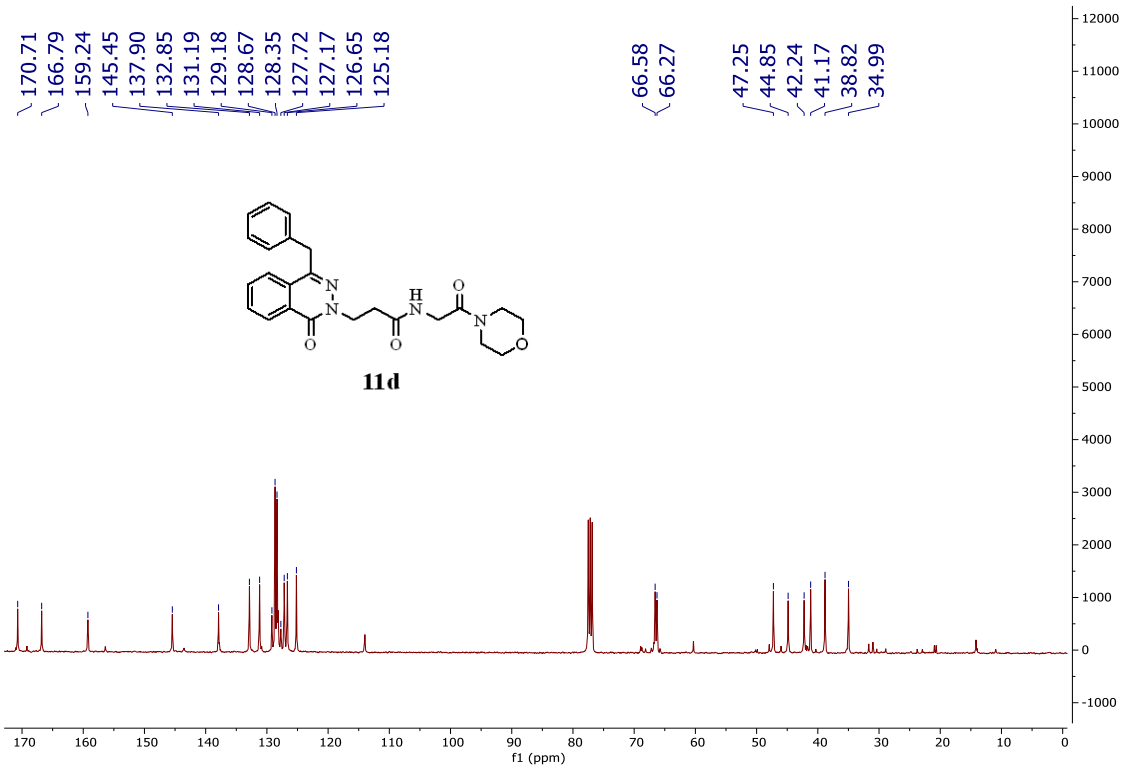

Figure S71: The  $^{13}\text{C}$ -NMR spectrum of compound **11d**

Jan21-2024.80.fid  
DH-24  
D2O  
proton\_su CDCl3 {D:\NMR Data} Student 23

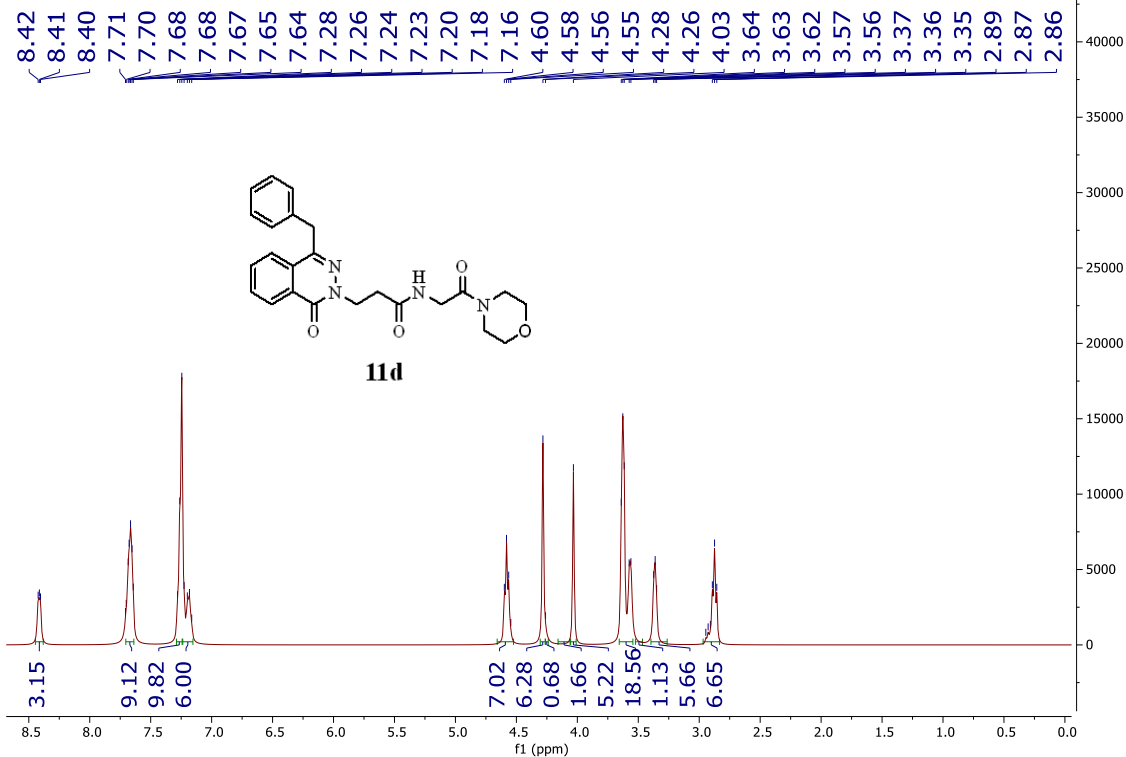

Figure S72: The D2O spectrum of compound **11d**

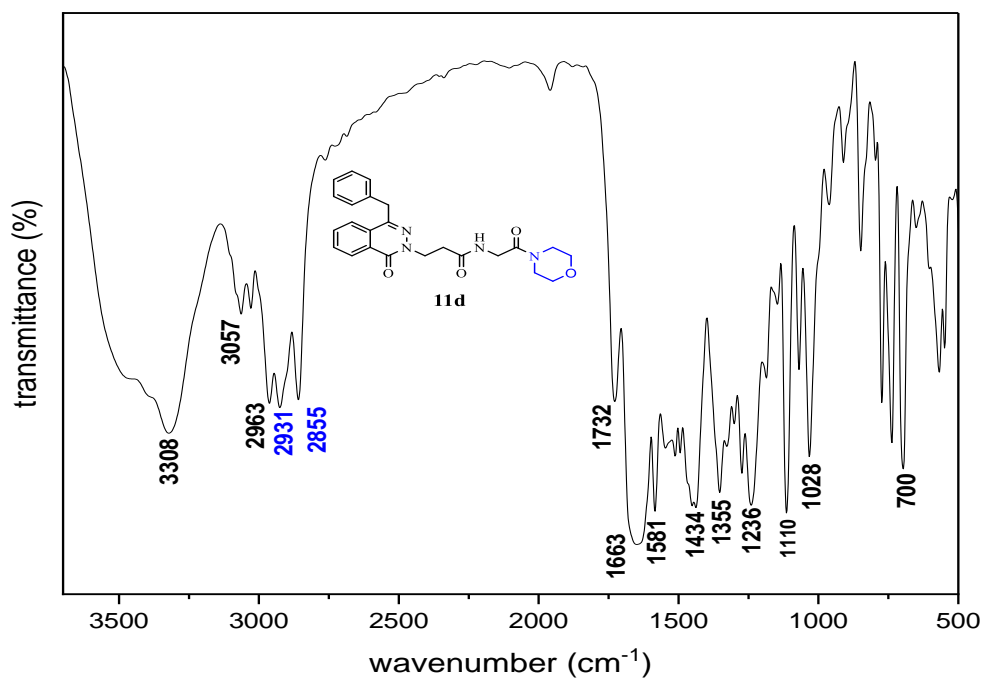

Figure S73: The IR spectrum of compound **11d**



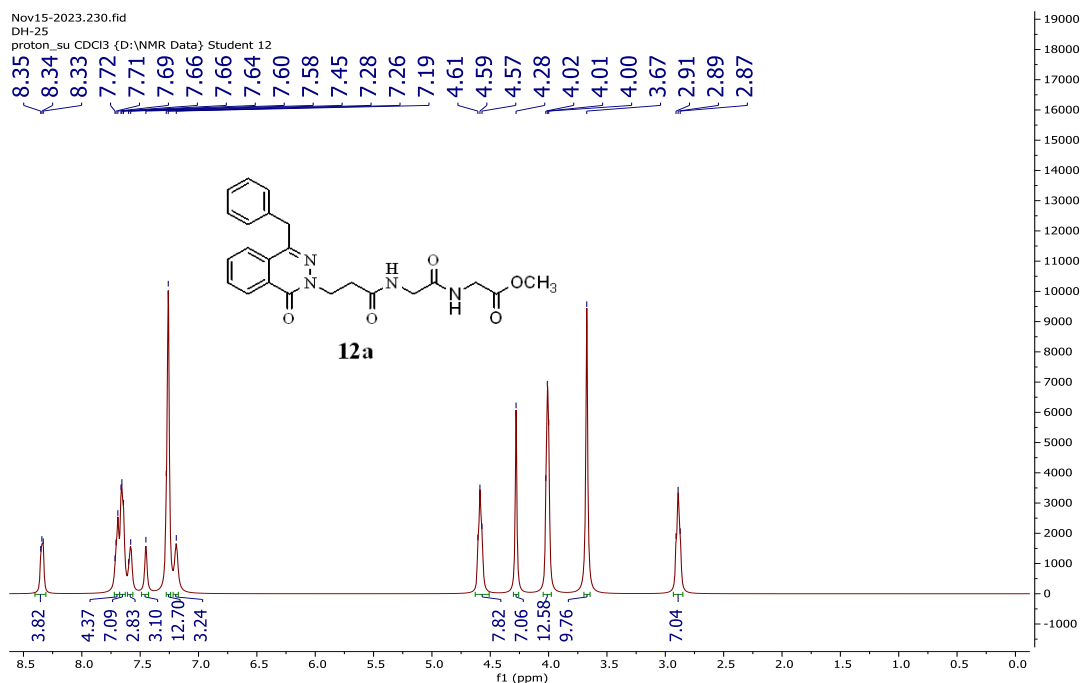

Figure S74: The  $^1\text{H}$ -NMR spectrum of compound **12a**

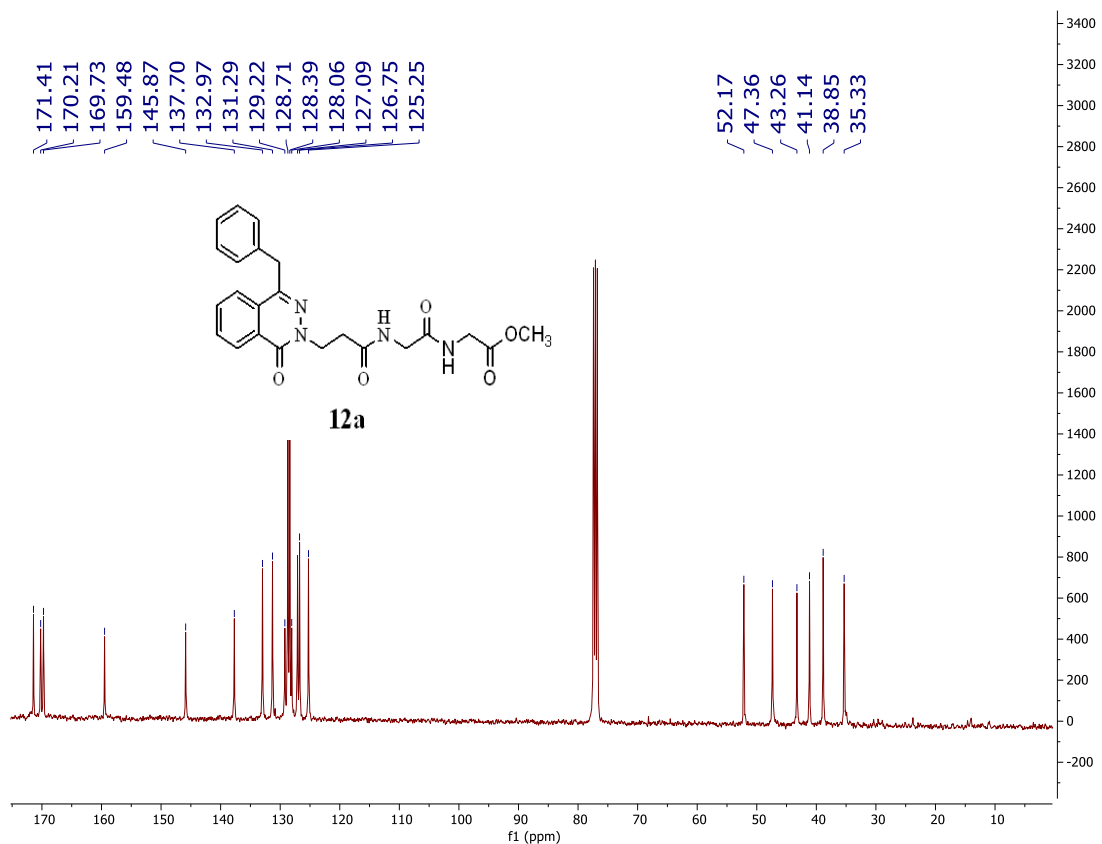

Figure S75: The  $^{13}\text{C}$ -NMR spectrum of compound **12a**

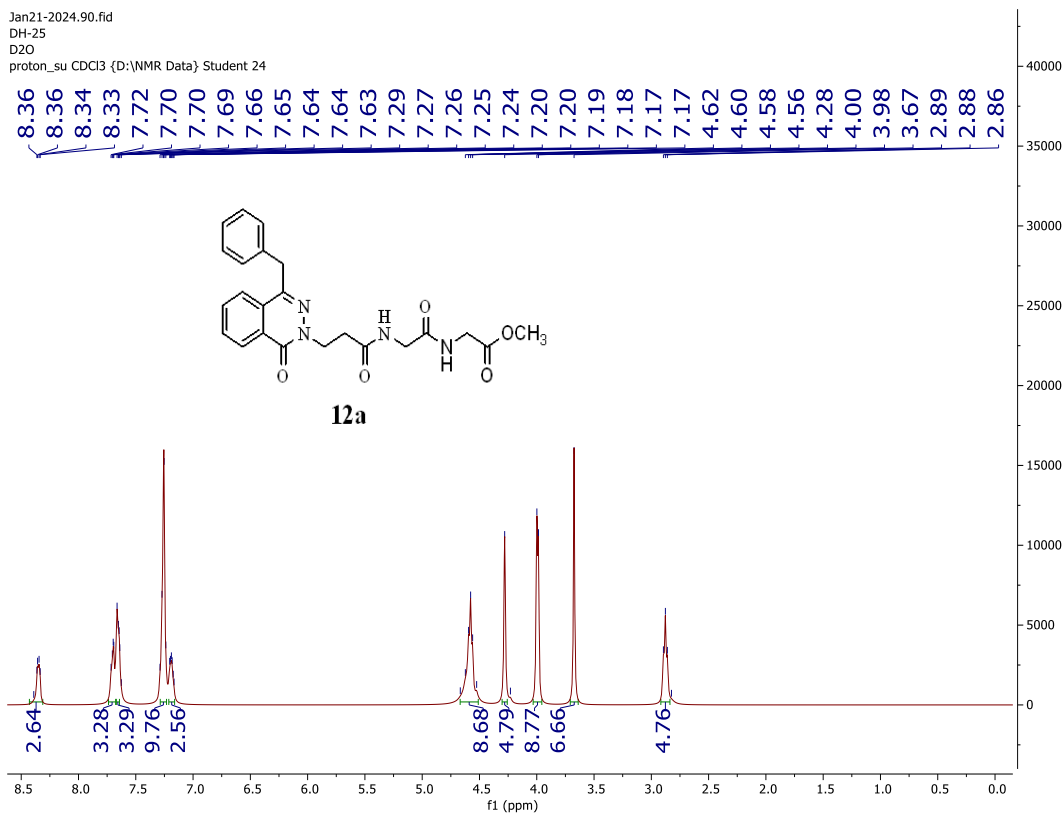

**Figure S76:** The D2O spectrum of compound **12a**

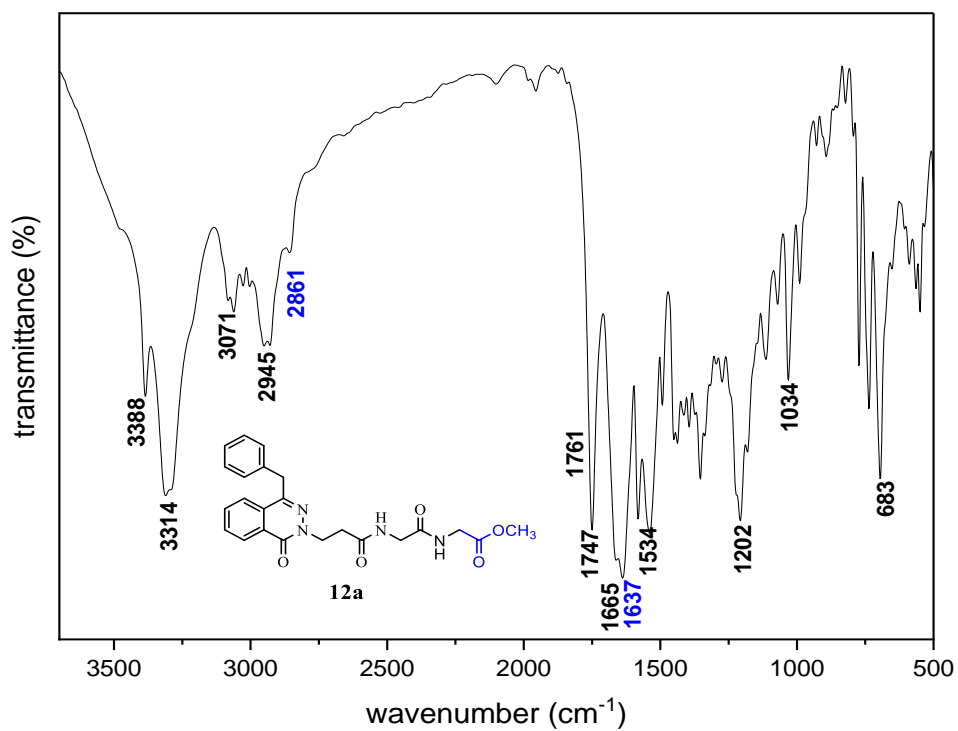

**Figure S77:** The IR spectrum of compound **12a**

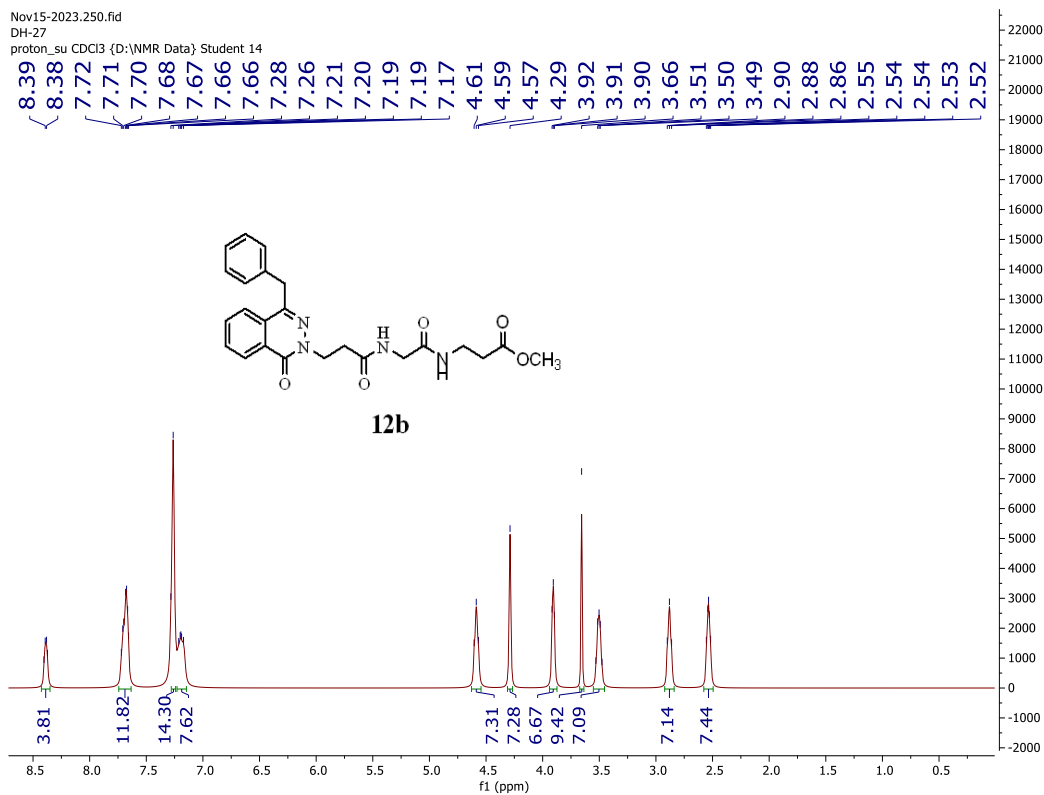

**Figure S78:** The  $^1\text{H}$ -NMR spectrum of compound **12b**

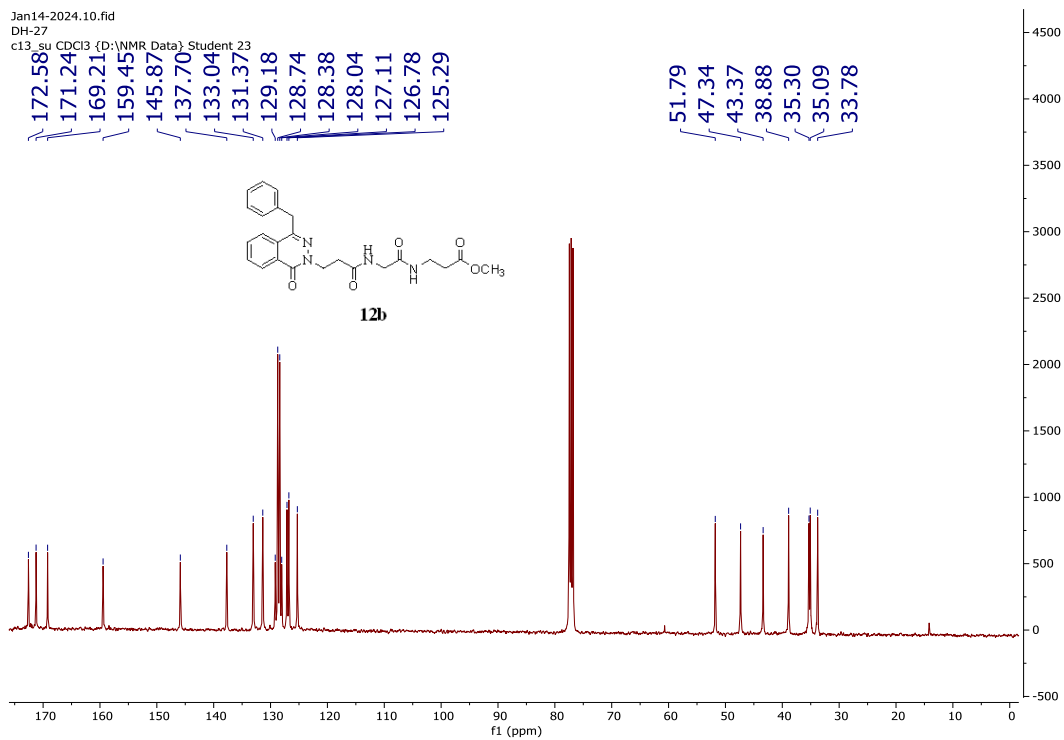

**Figure S79:** The  $^{13}\text{C}$ -NMR spectrum of compound **12b**

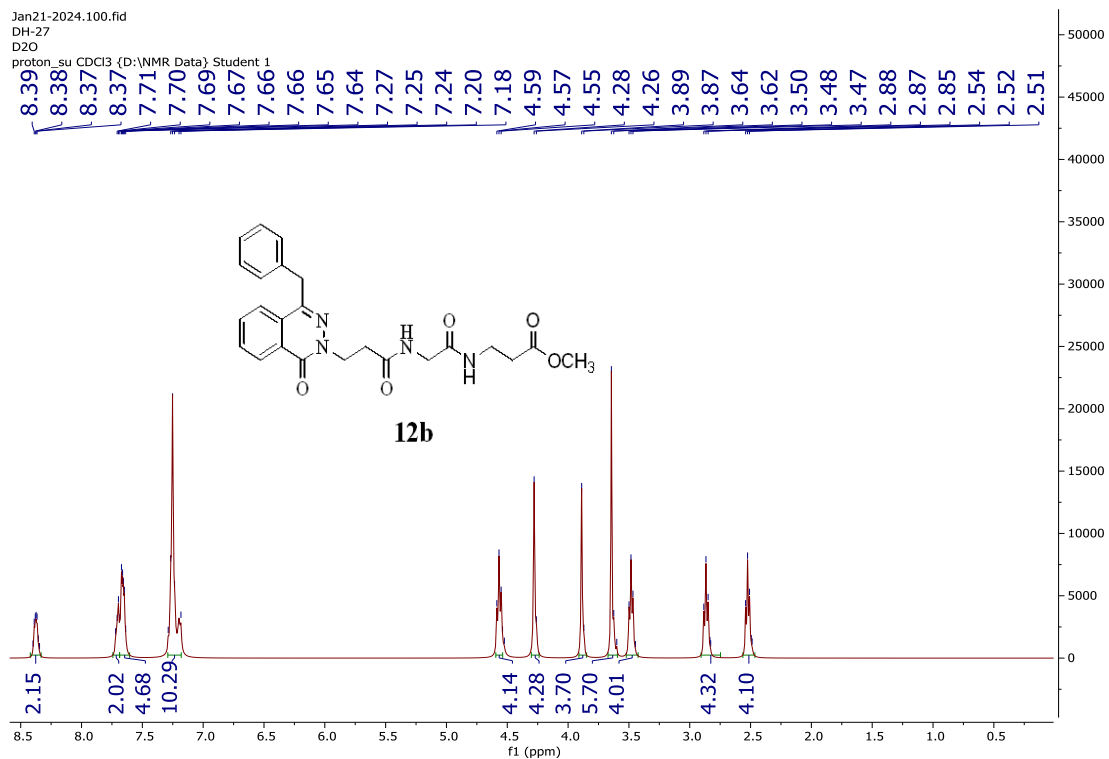

Figure S80: The D2O spectrum of compound **12b**

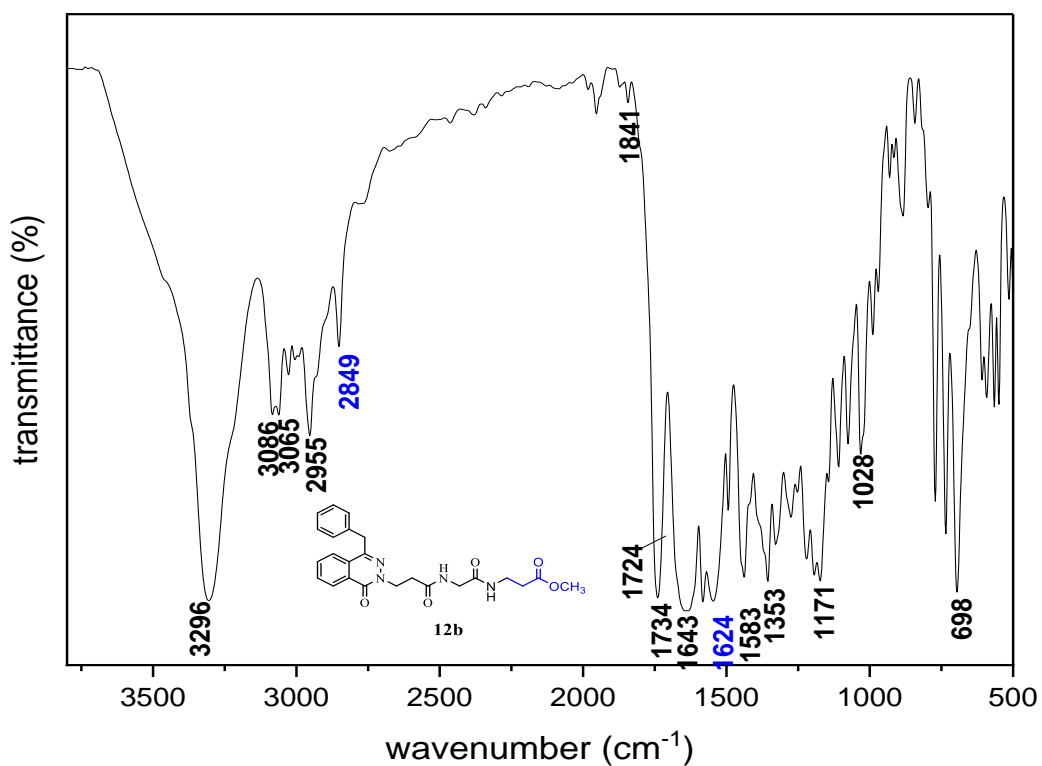

Figure S81: The IR spectrum of compound **12b**

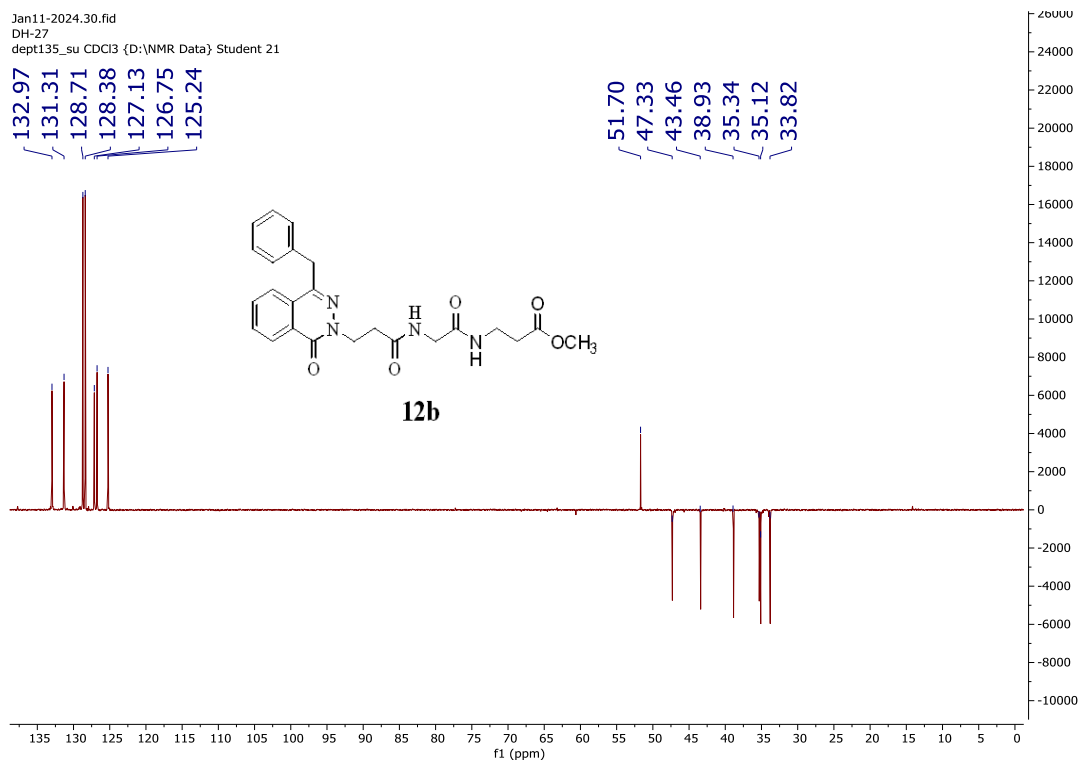

Figure S82: The dept135 spectrum of compound **12b**

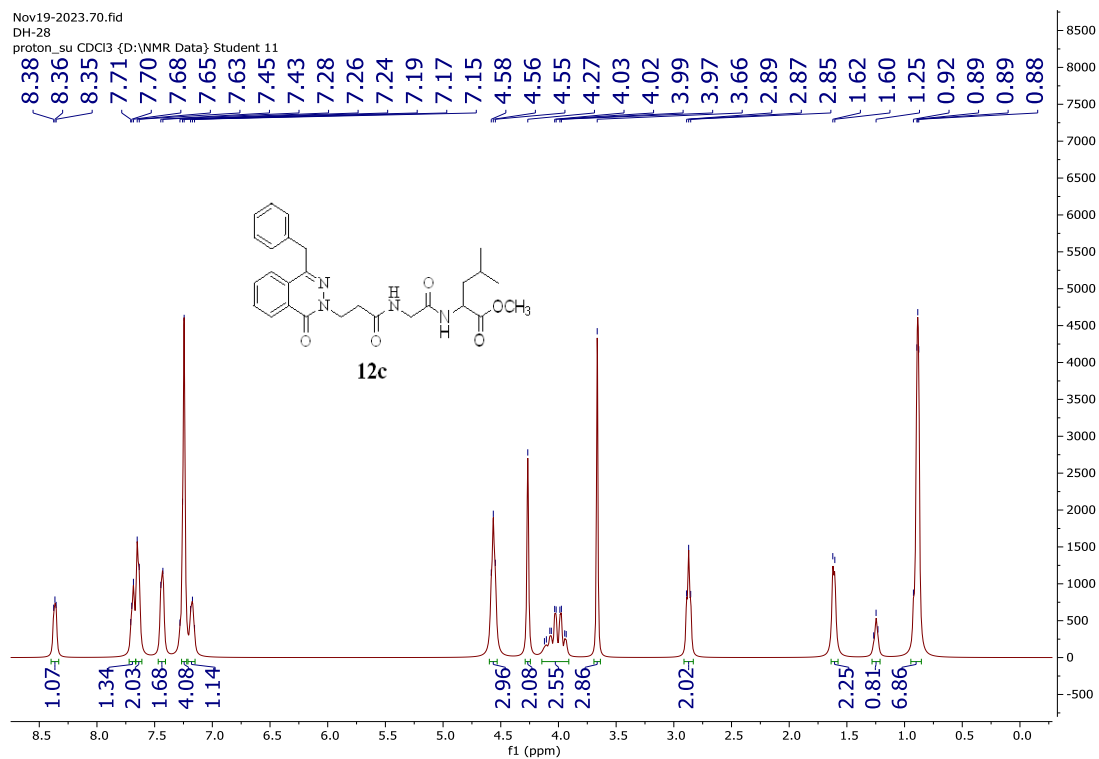

Figure S83: The  $^1\text{H}$ -NMR spectrum of compound **12c**

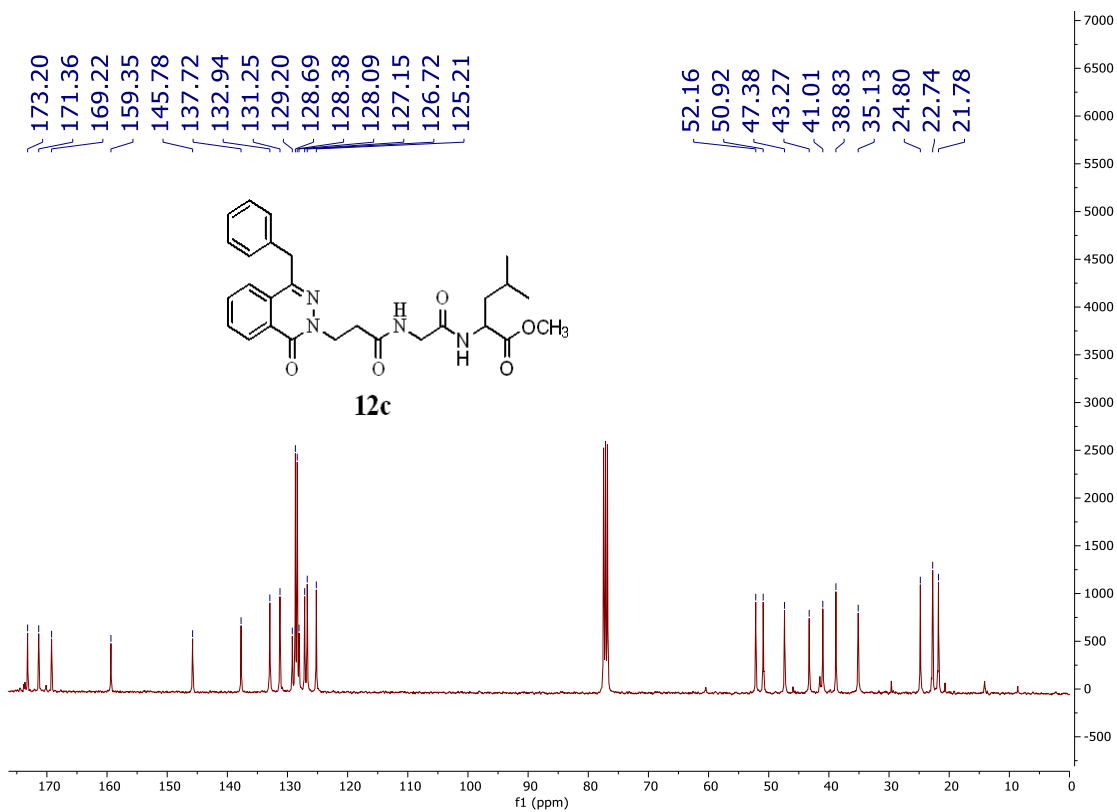

**Figure S84:** The  $^{13}\text{C}$ -NMR spectrum of compound **12c**

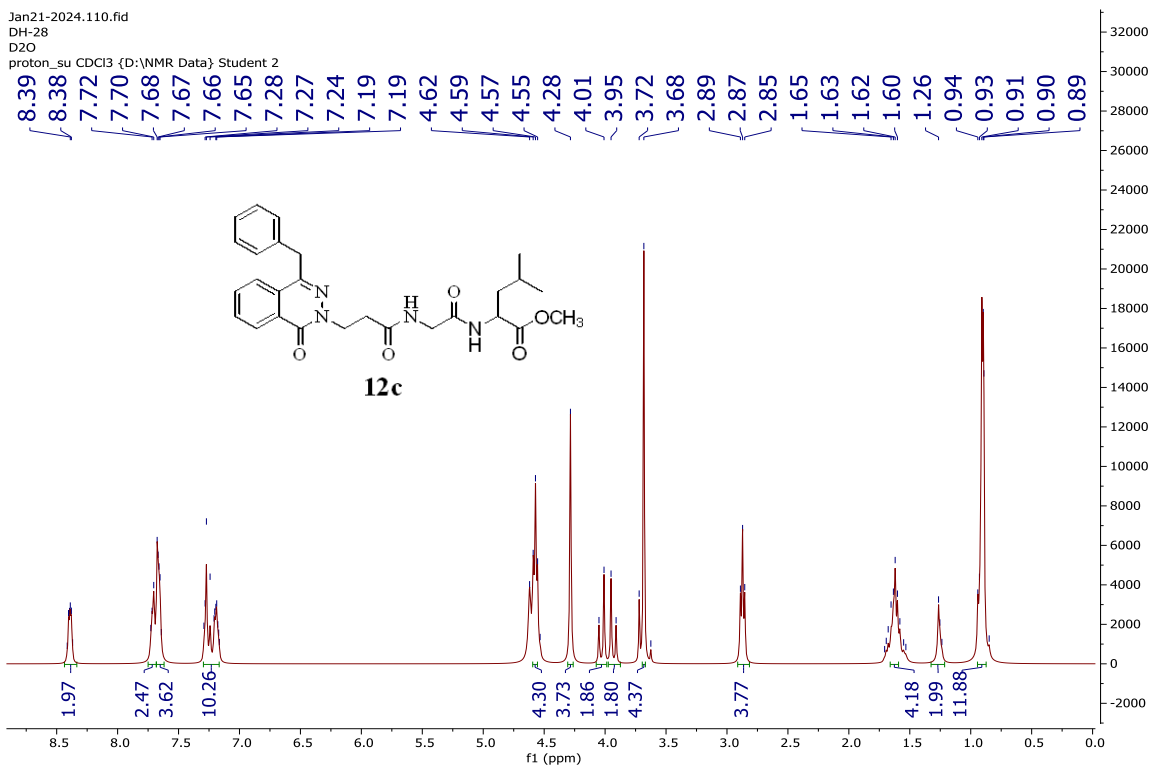

**Figure S85:** The D<sub>2</sub>O spectrum of compound **12c**

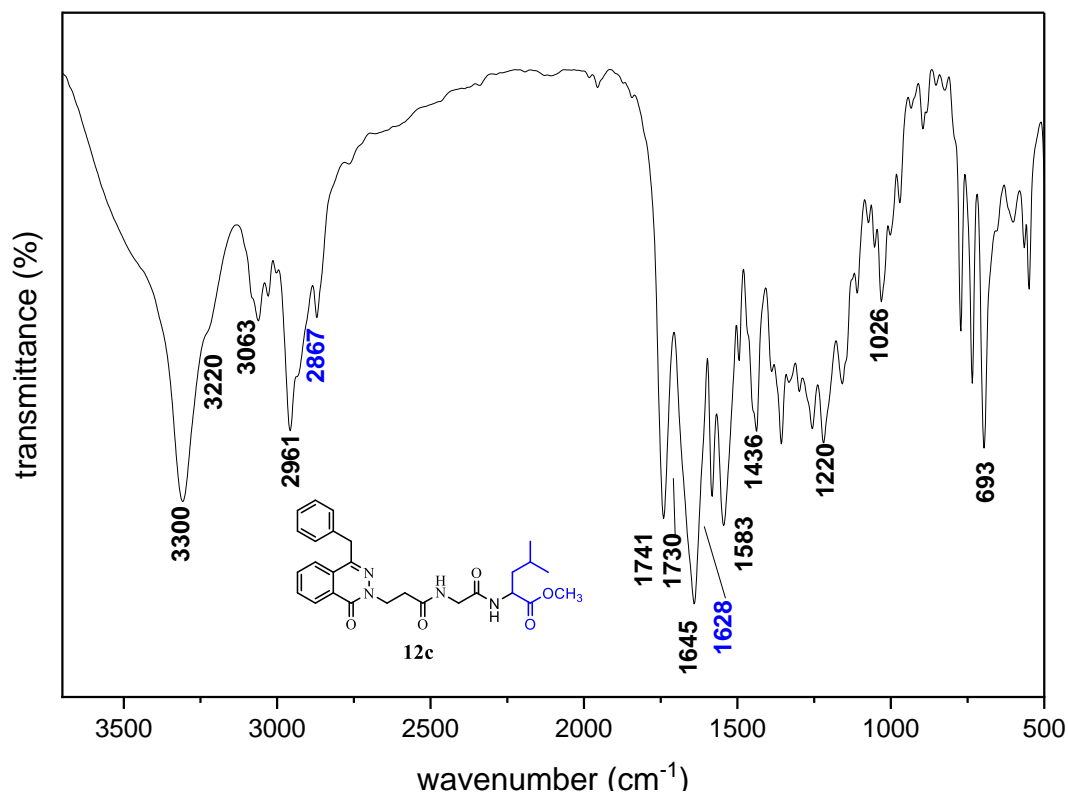

Figure S86: The IR spectrum of compound 12c

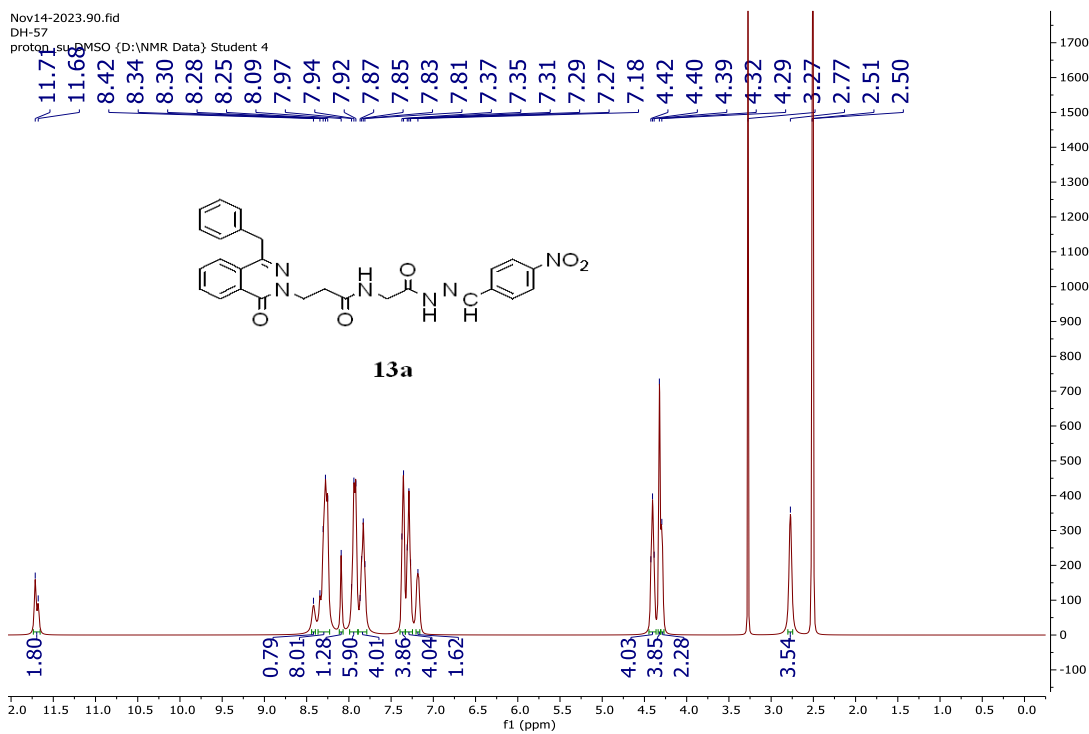

Figure S87: The <sup>1</sup>H-NMR spectrum of compound 13a

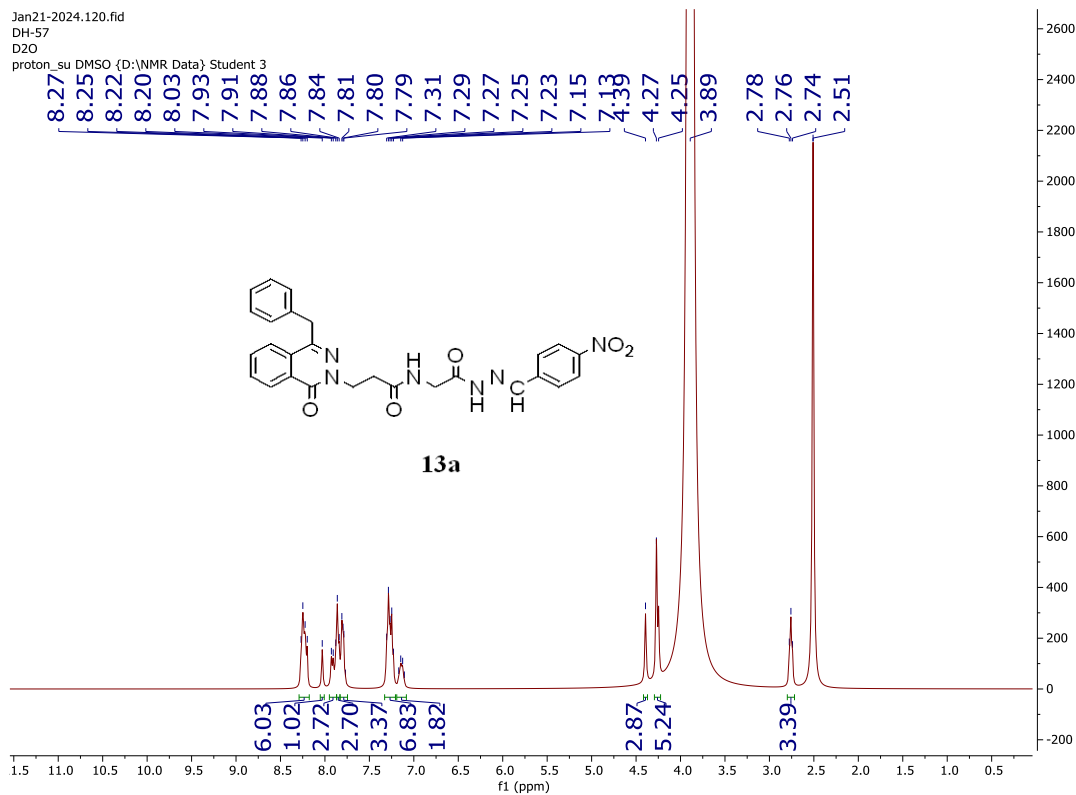

**Figure S88:** The D2O spectrum of compound **13a**

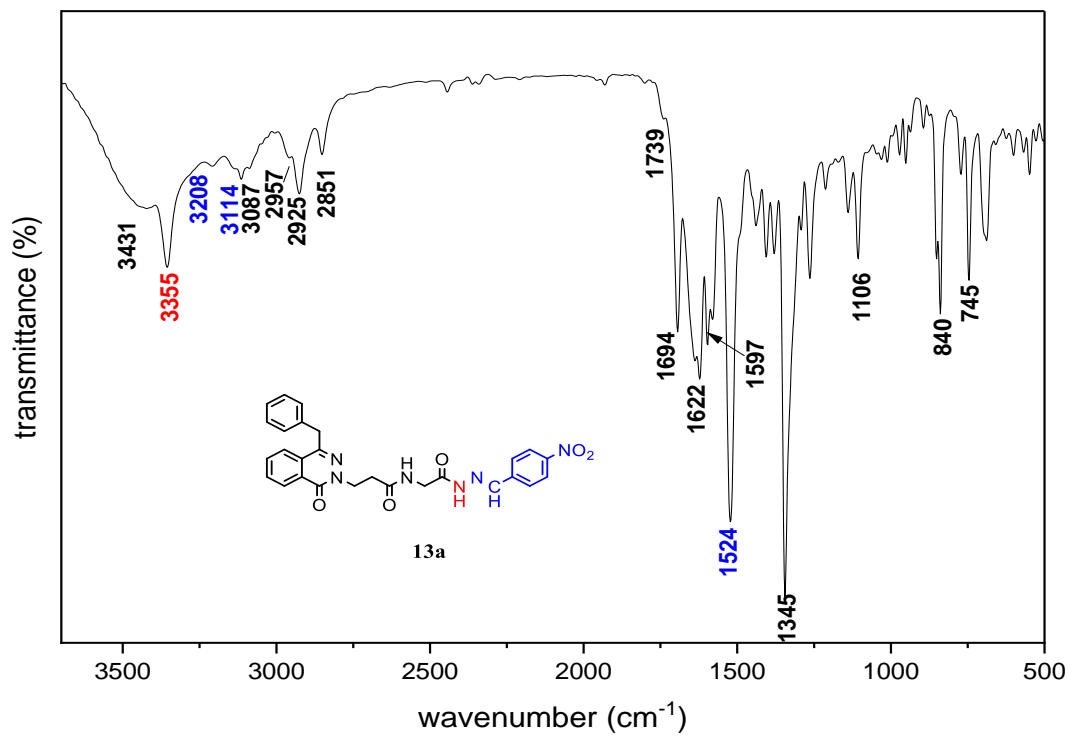

**Figure S89:** The IR spectrum of compound **13a**



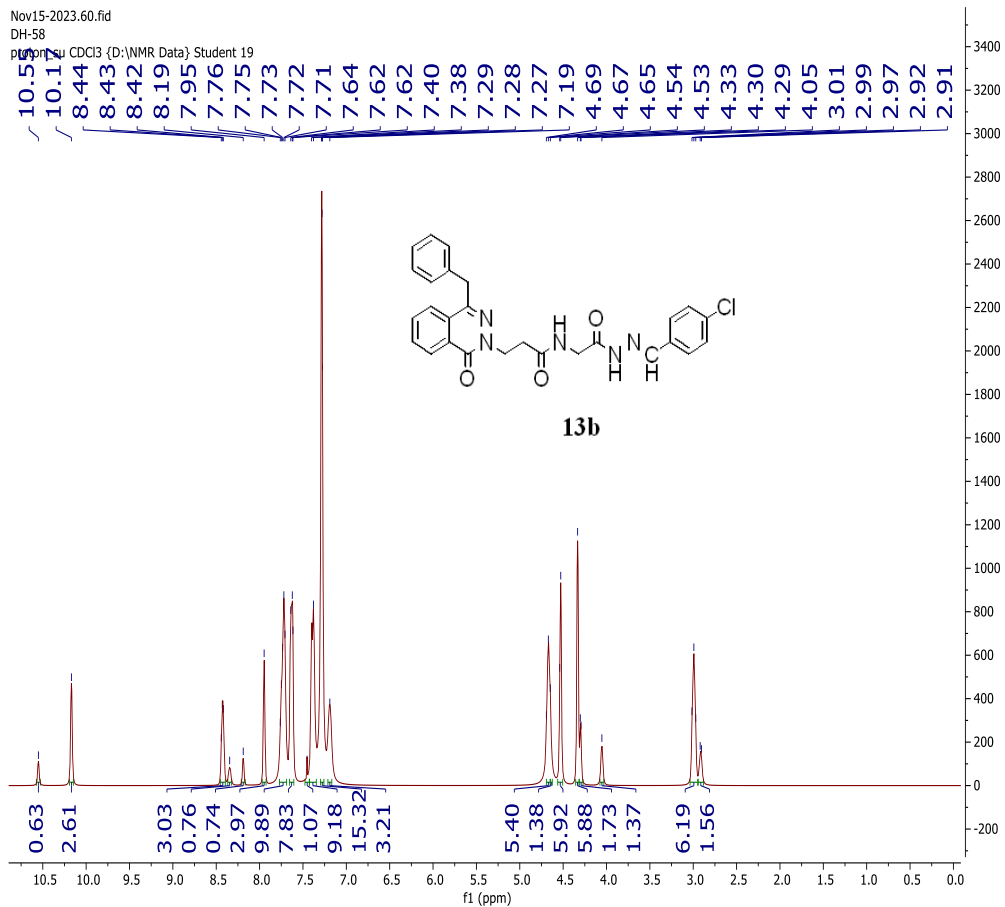

**Figure S90: The  $^1\text{H-NMR}$  spectrum of compound **13b****

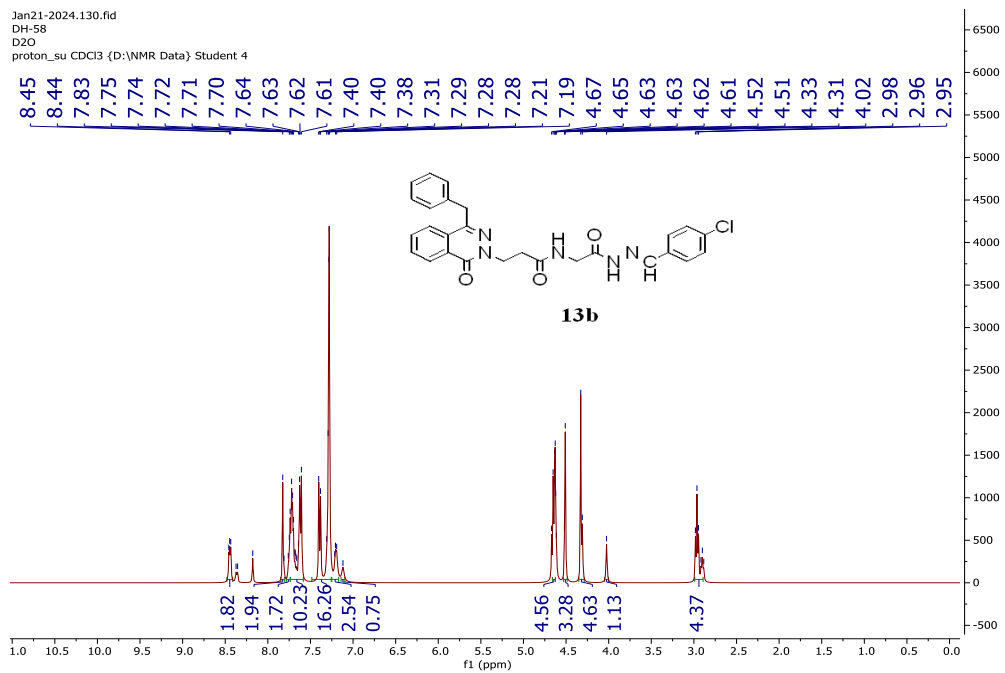

**Figure S91: The  $\text{D}_2\text{O}$  spectrum of compound **13b****

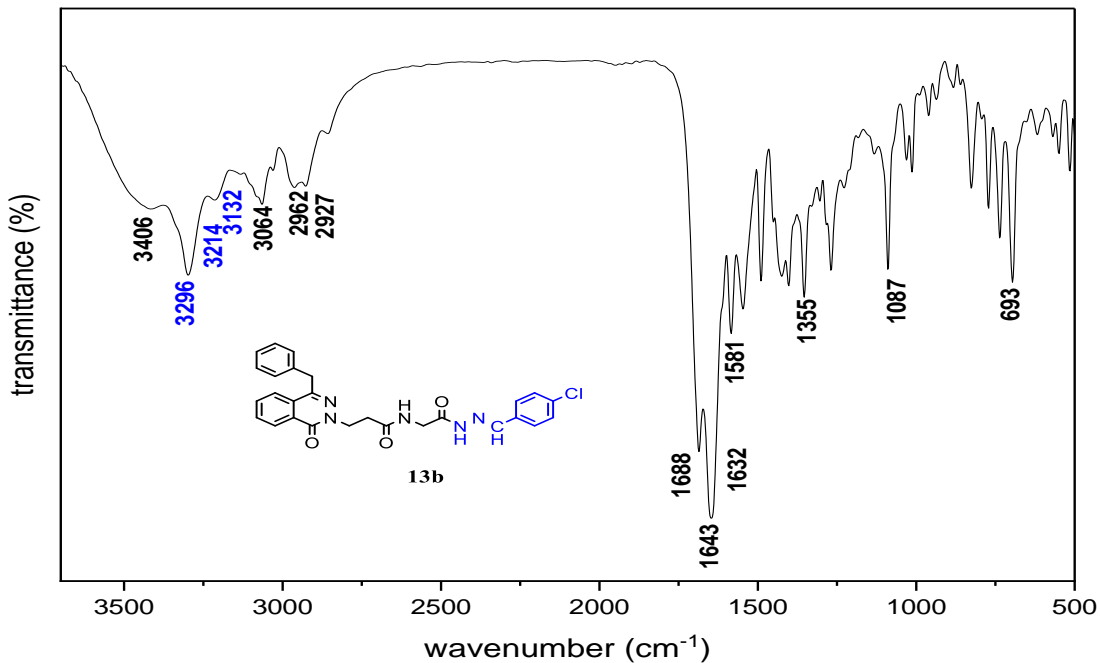

**Figure S92:**The IR spectrum of compound **13b**

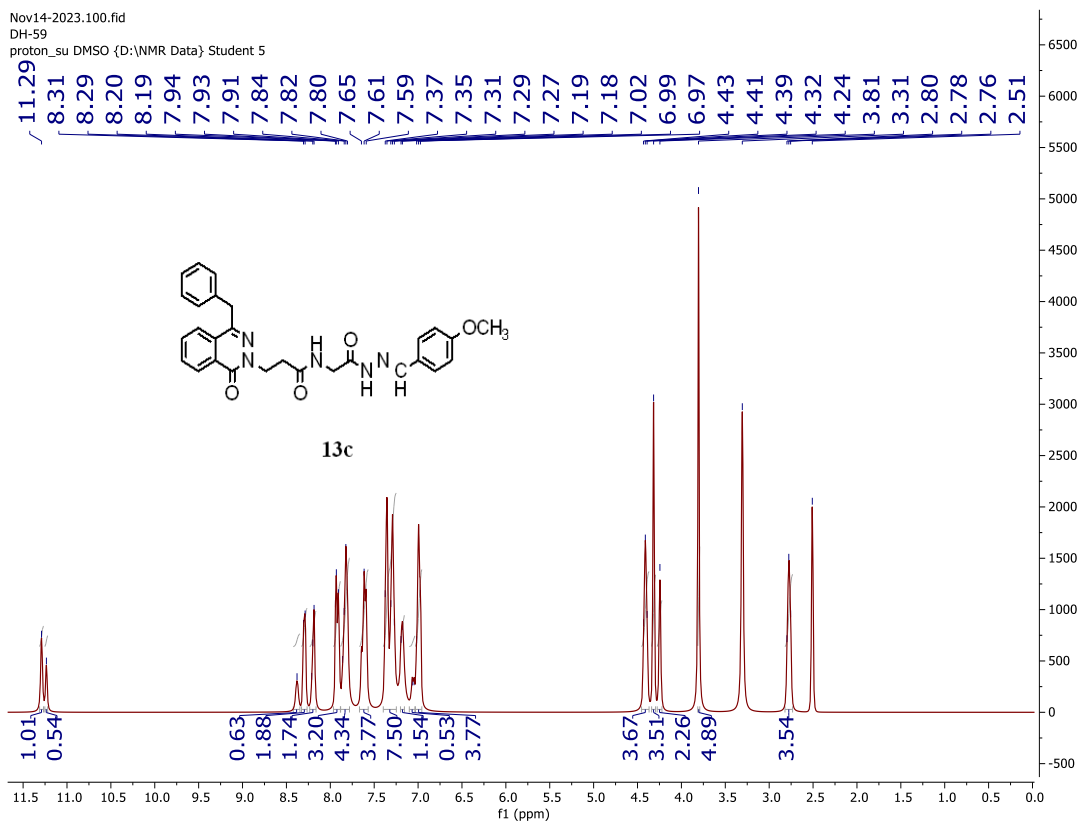

**Figure S93:**The <sup>1</sup>H-NMR spectrum of compound **13c**

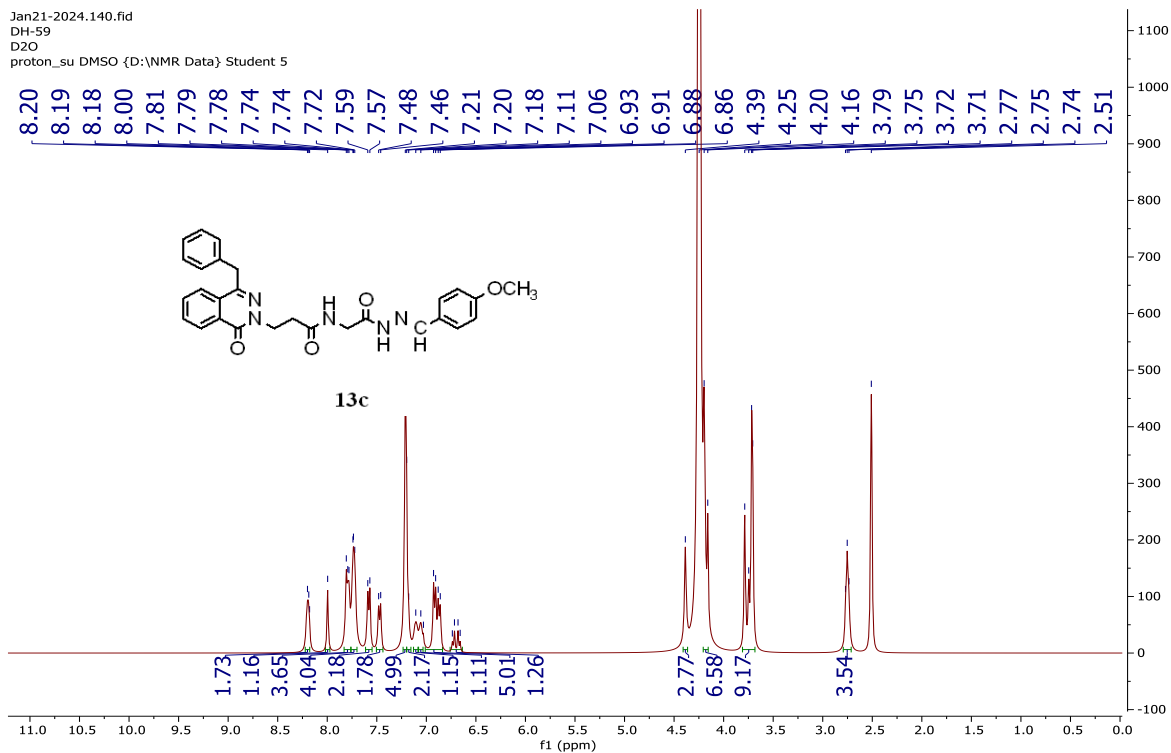

Figure S94: The D2O spectrum of compound 13c

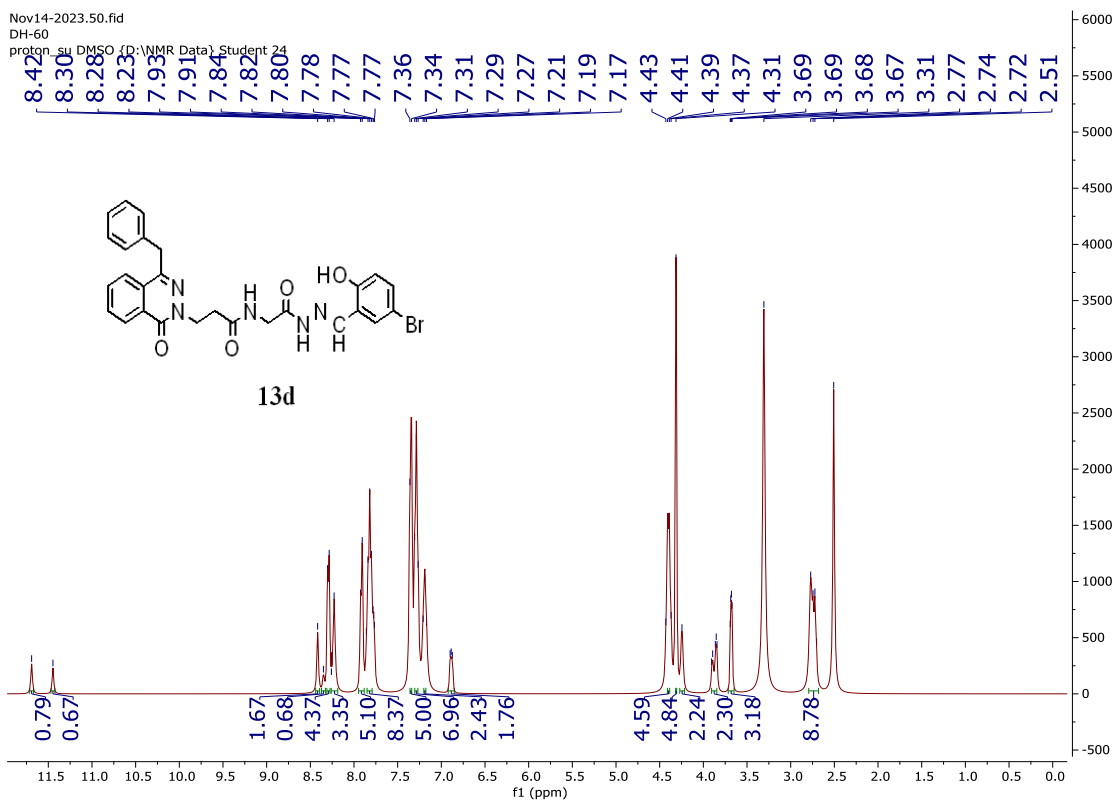

Figure S95: The <sup>1</sup>H-NMR spectrum of compound 13d

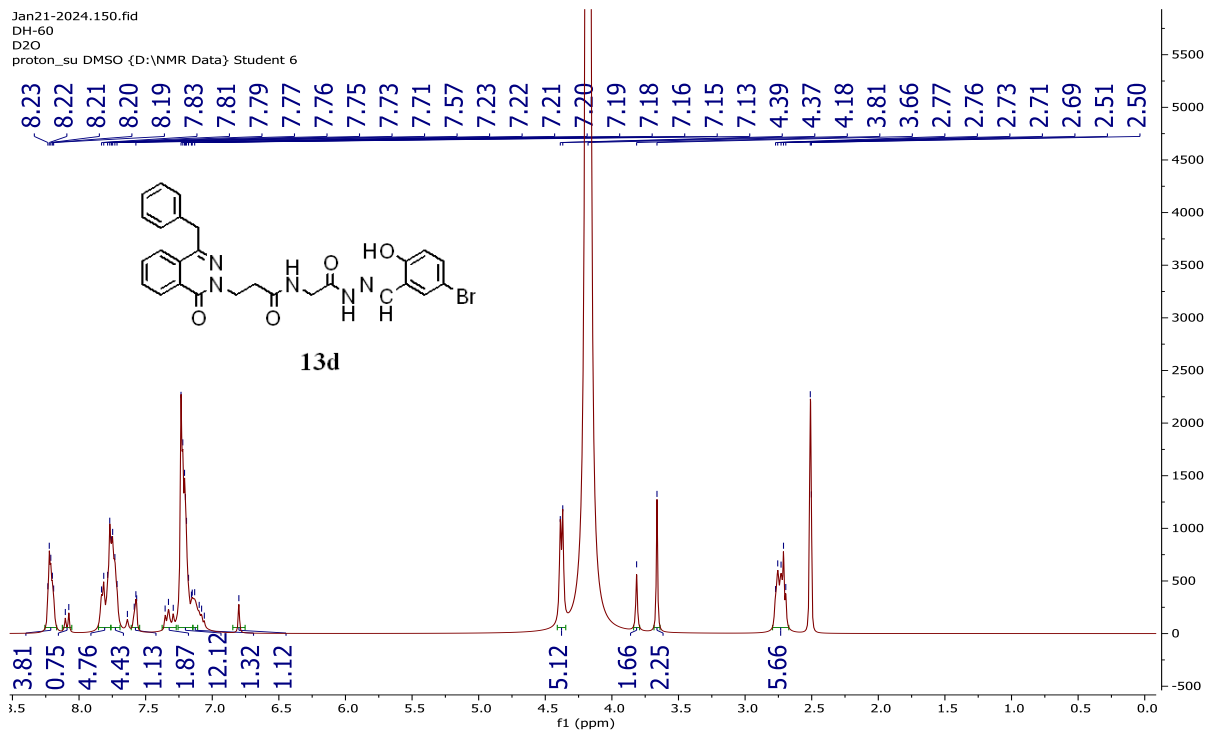

**Figure S96:**The D2O spectrum of compound **13d**

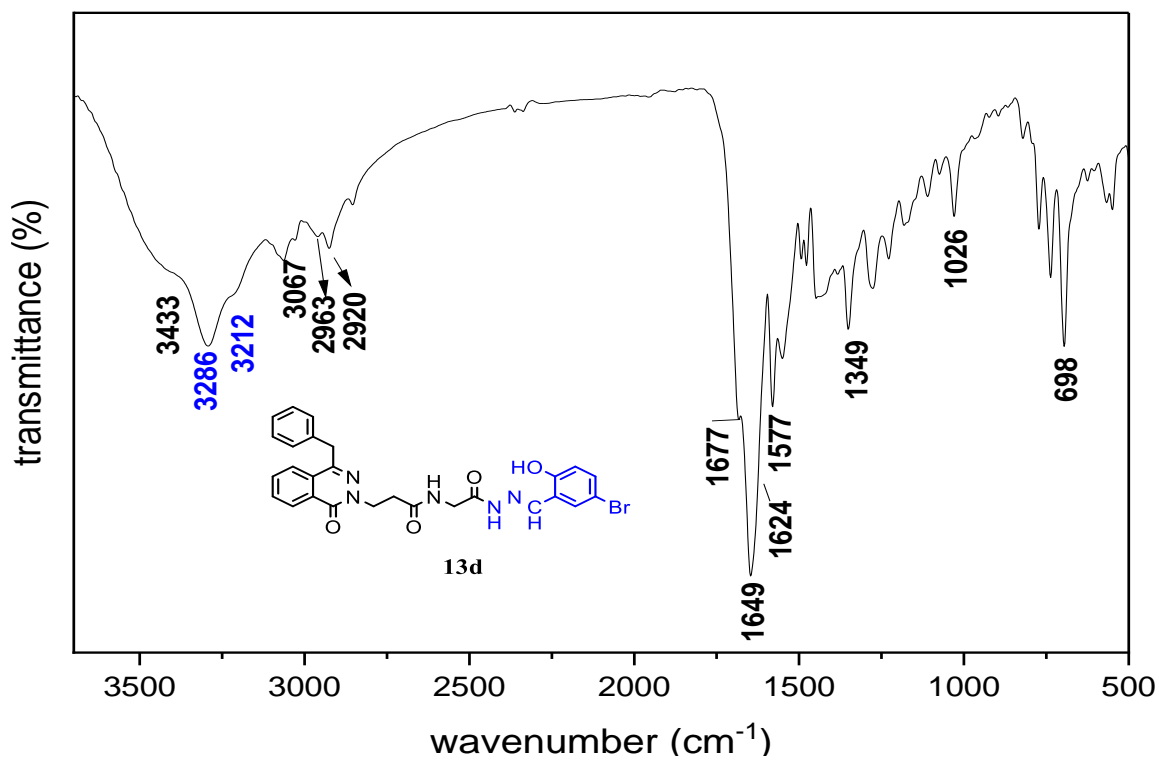

**Figure S97:**The IR spectrum of compound **13d**
